# Supplementary material for: Photochemical α-selective radical ring-opening reactions of 1,3-disubstituted acyl bicyclobutanes with alkyl halides: modular access to functionalized cyclobutenes
Source: Royal Society of Chemistry journal article supplement (doi:10.1039/d3sc04457b), 2023-01-01

# Photochemical $\alpha$ -selective radical ring-opening reactions of 1,3-disubstituted acyl bicyclobutanes with alkyl halides: modular access to the functionalized cyclobutenes

Yuanjiu Xiao,<sup>‡</sup> Tong-Tong Xu,<sup>‡</sup> Jin-Lan Zhou, Feng Wu, Lei Tang, Ruo-Yi Liu, Wen-Biao Wu\* and Jian-Jun Feng\*

## Supporting Information

### Table of Contents

|    |                                                                                                                    |     |
|----|--------------------------------------------------------------------------------------------------------------------|-----|
| 1  | General Information .....                                                                                          | S2  |
| 2  | Optimization of Reaction Conditions (Table S1-S3) .....                                                            | S3  |
| 3  | Unsuccessful Substrates .....                                                                                      | S3  |
| 4  | General Procedure for the Radical Ring-Opening Reactions of BCBs with Alkyl Halides (Condition A).....             | S5  |
| 5  | Procedure for the Radical Ring-Opening Reactions of BCB <b>1a</b> with Benzyl Bromide <b>2w</b> (Condition B)..... | S6  |
| 6  | Procedure for the Radical Ring-Opening Reactions of BCB <b>1a</b> with $\alpha$ -Chloroacetophenone .....          | S7  |
| 7  | Scale-Up Experiment.....                                                                                           | S8  |
| 8  | Synthetic Transformations .....                                                                                    | S8  |
| 9  | Mechanism Studies .....                                                                                            | S11 |
|    | 9.1 Radical Trapping Experiments.....                                                                              | S11 |
|    | 9.2 Control Experiments.....                                                                                       | S12 |
|    | 9.3 Light On/Off Experiment.....                                                                                   | S13 |
|    | 9.4 Stern-Volmer Fluorescence Quenching Experiments .....                                                          | S14 |
| 10 | Characterization Data of the Products .....                                                                        | S16 |
| 11 | Crystal Structure of <b>3am</b> .....                                                                              | S48 |
| 12 | References .....                                                                                                   | S50 |
| 13 | NMR Spectra.....                                                                                                   | S51 |

## 1 General Information

All reactions were performed in flame-dried glassware using conventional Schlenk techniques under a static pressure of nitrogen unless otherwise stated. Liquids and solutions were transferred with syringes. Bicyclo[1.1.0]butanes (BCBs)<sup>[1]</sup> were prepared according to reported procedures. Other commercially available reagents were purchased from *Sigma-Adrich*, *Leyan* and *Bide* Chemical Company. *N,N*-Dimethylacetamide (DMA), *N,N*-Dimethylformamide (DMF), Chlorobenzene (PhCl) and Acetonitrile (MeCN) were purchased from *Energy Chemical* (99%, Extra Dry) and used as received. All other solvents (THF, dioxane and 1,2-dichloroethane *etc.*) were dried and purified following standard procedures. Technical grade solvents for extraction or chromatography (Petroleum ether, CH<sub>2</sub>Cl<sub>2</sub>, and ethyl acetate) were distilled prior to use. Analytical thin layer chromatography (TLC) was performed on silica gel 60 F254 glass plates by *Merck*. Flash column chromatography was performed on silica gel 60 (40–63 µm, 230–400 mesh, ASTM) by *Grace* using the indicated solvents. <sup>1</sup>H, <sup>13</sup>C NMR spectra were recorded in CDCl<sub>3</sub> on Bruker AV400 instruments. Chemical shifts are reported in parts per million (ppm) and are referenced to the residual solvent resonance as the internal standard (CHCl<sub>3</sub>: δ = 7.26 ppm for <sup>1</sup>H NMR and CDCl<sub>3</sub>: δ = 77.0 ppm for <sup>13</sup>C NMR). Data are reported as follows: chemical shift, multiplicity (s = singlet, d = doublet, t = triplet, q = quartet, m = multiplet), coupling constants (Hz), and integration. The full-scan mass spectra were taken on a hybrid quadrupole-orbitrap mass spectrometer equipped with a heated electrospray ionization source (ThermoFischer Scientific, Bremen, Germany). X-ray data were taken on a Bruker SMART APEX II X-Ray diffractometer equipped with a large area CCD detector. Acknowledgement: the <sup>1</sup>H, <sup>13</sup>C NMR spectra and HRMS (ESI) were performed at Analytical Instrumentation Center of Hunan University.

## 2 Optimization of Reaction Conditions (Table S1-S3)

**Table S1. Catalyst Optimization<sup>a,b</sup>**

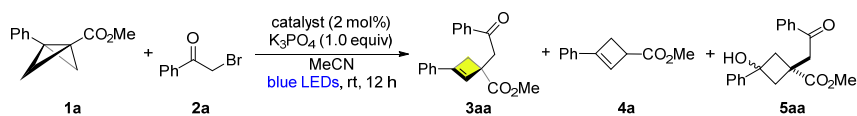

| entry | catalyst                                                           | conv. (%) <sup>b</sup> | yield of <b>3aa</b> (%) <sup>b</sup> | yield of <b>4a</b> (%) <sup>b</sup> | yield of <b>5aa</b> (%) <sup>b</sup> |
|-------|--------------------------------------------------------------------|------------------------|--------------------------------------|-------------------------------------|--------------------------------------|
| 1     | <i>fac</i> -Ir(ppy) <sub>3</sub>                                   | 83                     | 30                                   | 5                                   | 12                                   |
| 2     | [Ir{dF(CF <sub>3</sub> )ppy} <sub>2</sub> (dtbbpy)]PF <sub>6</sub> | 25                     | 0                                    | 5                                   | 0                                    |
| 3     | Ru(bpy) <sub>3</sub> Cl <sub>2</sub> ·6H <sub>2</sub> O            | 20                     | 6                                    | <5                                  | <5                                   |
| 4     | Ru(bpy) <sub>3</sub> (PF <sub>6</sub> ) <sub>2</sub>               | 43                     | 7                                    | <5                                  | <5                                   |
| 5     | Eosin Y                                                            | 10                     | <5                                   | <5                                  | 0                                    |
| 6     | 4-CzIPN                                                            | 50                     | 7                                    | <5                                  | 0                                    |
| 7     | [Acr <sup>+</sup> -Mes]ClO <sub>4</sub>                            | 0                      | 0                                    | 0                                   | 0                                    |
| 8     | 10H-phenothiazine                                                  | 8                      | 0                                    | 0                                   | 0                                    |

<sup>a</sup>Reaction conditions: **1a** (0.2 mmol), **2a** (0.3 mmol), catalyst (2.0 mol%) and  $K_3PO_4$  (1.0 equiv) in MeCN (2.0 mL) stirred at rt in blue LEDs for 12 h. <sup>b</sup>The yields were determined by <sup>1</sup>H NMR spectroscopy using CH<sub>2</sub>Br<sub>2</sub> as the internal standard.

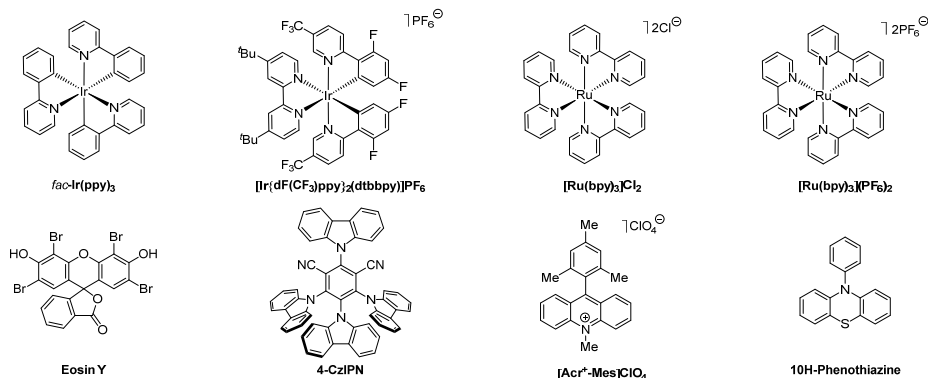

**Table S2. Solvent and Base Optimization<sup>a,b</sup>**

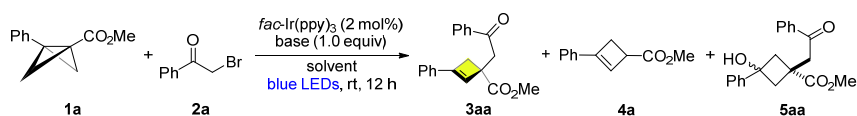

| entry | solvent | base                            | conv. (%) <sup>b</sup> | yield of <b>3aa</b> (%) <sup>b</sup> | yield of <b>4a</b> (%) <sup>b</sup> | yield of <b>5aa</b> (%) <sup>b</sup> |
|-------|---------|---------------------------------|------------------------|--------------------------------------|-------------------------------------|--------------------------------------|
| 1     | MeCN    | K <sub>3</sub> PO <sub>4</sub>  | 83                     | 30                                   | 5                                   | 12                                   |
| 2     | THF     | K <sub>3</sub> PO <sub>4</sub>  | 100                    | 43                                   | 9                                   | 6                                    |
| 3     | dioxane | K <sub>3</sub> PO <sub>4</sub>  | 12                     | <5                                   | <5                                  | 0                                    |
| 4     | DCE     | K <sub>3</sub> PO <sub>4</sub>  | 100                    | 0                                    | 36                                  | <5                                   |
| 5     | acetone | K <sub>3</sub> PO <sub>4</sub>  | 100                    | 23                                   | 10                                  | 8                                    |
| 6     | PhCl    | K <sub>3</sub> PO <sub>4</sub>  | 100                    | 0                                    | 64                                  | 0                                    |
| 7     | DMF     | K <sub>3</sub> PO <sub>4</sub>  | 100                    | 58                                   | <5                                  | 6                                    |
| 8     | DMF     | K <sub>2</sub> HPO <sub>4</sub> | 100                    | 62                                   | <5                                  | 11                                   |
| 9     | DMF     | KH <sub>2</sub> PO <sub>4</sub> | 96                     | 30                                   | 0                                   | 5                                    |

|    |      |                                 |     |    |    |    |
|----|------|---------------------------------|-----|----|----|----|
| 10 | DMF  | K <sub>2</sub> CO <sub>3</sub>  | 100 | 38 | <5 | <5 |
| 11 | DMF  | Na <sub>2</sub> CO <sub>3</sub> | 100 | 35 | <5 | <5 |
| 12 | DMF  | NaOAc                           | 100 | 25 | <5 | <5 |
| 13 | DMF  | Et <sub>3</sub> N               | 100 | 11 | 5  | 0  |
| 14 | DMF  | DBU                             | 100 | 20 | 25 | 0  |
| 15 | DMA  | K <sub>2</sub> HPO <sub>4</sub> | 100 | 71 | <5 | 5  |
| 16 | NMP  | K <sub>2</sub> HPO <sub>4</sub> | 100 | 70 | 0  | 0  |
| 17 | DMSO | K <sub>2</sub> HPO <sub>4</sub> | 100 | 35 | 0  | 6  |

<sup>a</sup>Reaction conditions: **1a** (0.2 mmol), **2a** (0.3 mmol), *fac*-Ir(ppy)<sub>3</sub> (2.0 mol%) and base (1.0 equiv) in solvent (2.0 mL) stirred at rt in blue LEDs for 12 h. <sup>b</sup>The yields were determined by <sup>1</sup>H NMR spectroscopy using CH<sub>2</sub>Br<sub>2</sub> as the internal standard.

**Table S3. Other Optimizations<sup>a,b</sup>**

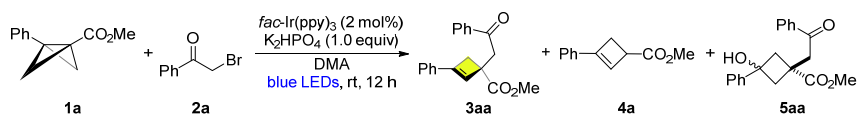

| entry | Variation from standard conditions                   | conv. (%) <sup>b</sup> | yield of <b>3aa</b> (%) <sup>b</sup> | yield of <b>4a</b> (%) <sup>b</sup> | yield of <b>5aa</b> (%) <sup>b</sup> |
|-------|------------------------------------------------------|------------------------|--------------------------------------|-------------------------------------|--------------------------------------|
| 1     | K <sub>2</sub> HPO <sub>4</sub> (1.5 equiv) was used | 100                    | 68                                   | <5                                  | <5                                   |
| 2     | K <sub>2</sub> HPO <sub>4</sub> (2.0 equiv) was used | 100                    | 67                                   | <5                                  | <5                                   |
| 3     | H <sub>2</sub> O (0.5 equiv) as additive             | 100                    | 71                                   | <5                                  | 7                                    |
| 4     | H <sub>2</sub> O (2.0 equiv) as additive             | 100                    | 64                                   | <5                                  | 11                                   |
| 5     | Without <i>fac</i> -Ir(ppy) <sub>3</sub>             | 5                      | 0                                    | 5                                   | 0                                    |
| 6     | In dark                                              | 36                     | 0                                    | <5                                  | 0                                    |
| 7     | Reaction time: 6 h                                   | 100                    | 70                                   | <5                                  | 9                                    |
| 8     | Reaction time: 3 h                                   | 100                    | 71                                   | <5                                  | 6                                    |

<sup>a</sup>Reaction conditions: **1a** (0.2 mmol), **2a** (0.3 mmol), *fac*-Ir(ppy)<sub>3</sub> (2.0 mol%) and K<sub>2</sub>HPO<sub>4</sub> (1.0 equiv) in DMA (2.0 mL) stirred at rt in blue LEDs for 12 h. <sup>b</sup>The yields were determined by <sup>1</sup>H NMR spectroscopy using CH<sub>2</sub>Br<sub>2</sub> as the internal standard.

### 3 Unsuccessful Substrates

The following Scheme S1 list the BCB substrates that were unsuccessfully tested. The reactions were carried out according to conditions A and were analyzed by crude <sup>1</sup>H NMR with CH<sub>2</sub>Br<sub>2</sub> as an internal standard. The reaction is not limited to aryl-substituted BCBs. Alkyl-substituted BCB **1p** was also found to be compatible, albeit with a low yield under conditions A. However, the reaction with 1,3-disubstituted BCB sulfone **1q** did not afford the desired product. Additionally, we investigated the influence of the substituent at the β-position of BCB in this site-selective reaction. The reaction between monosubstituted BCB ketone **1r** and monosubstituted BCB amide **1s** resulted in a complex mixture. However, the ring-opening reaction of

monosubstituted BCB sulfone **1t** with **2a** produced the desired cyclobutane product **6** through regular addition reaction, with a 52% NMR yield and a 1.3:1 diastereomeric ratio.

### Scheme S1 Unsuccessful BCBs

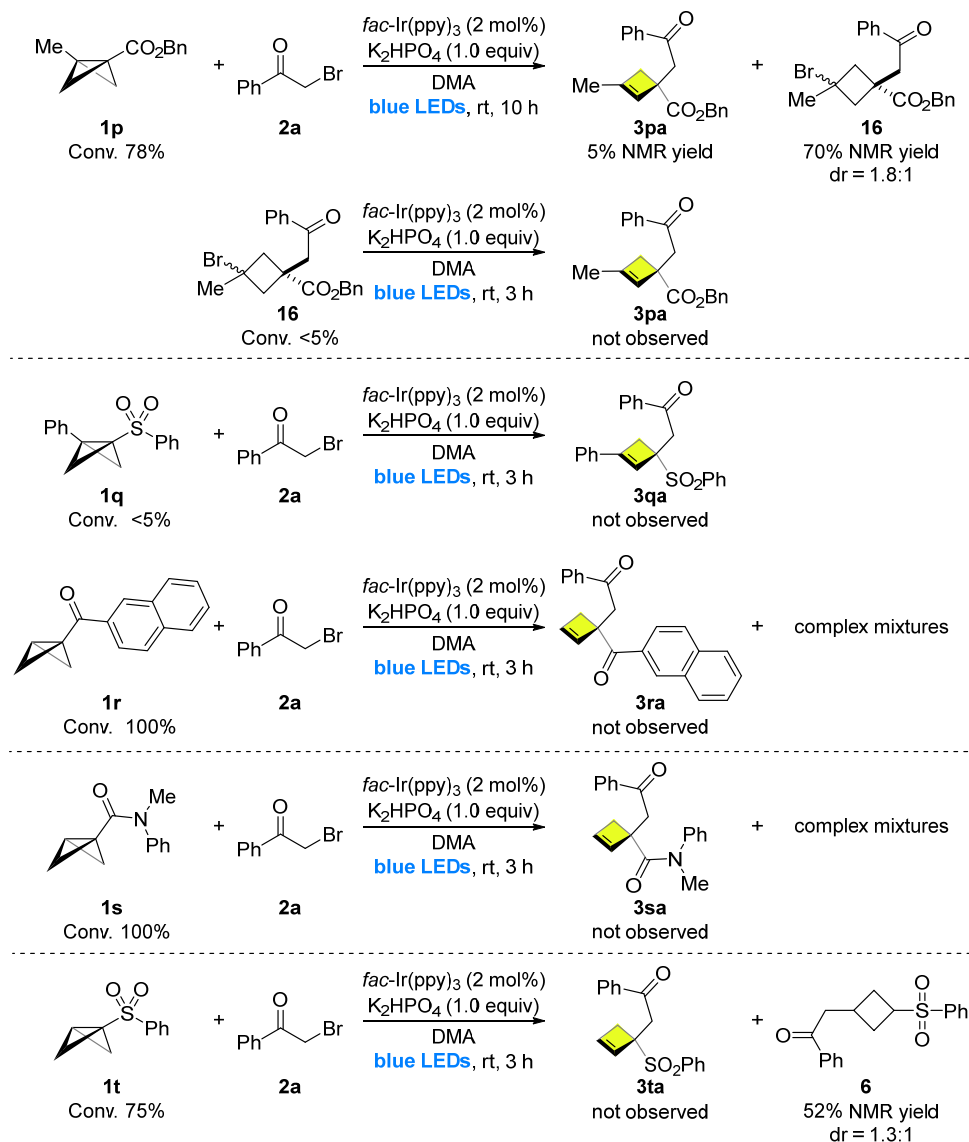

## 4 General Procedure for the Radical Ring-Opening Reactions of BCBs with Alkyl Halides (Condition A)

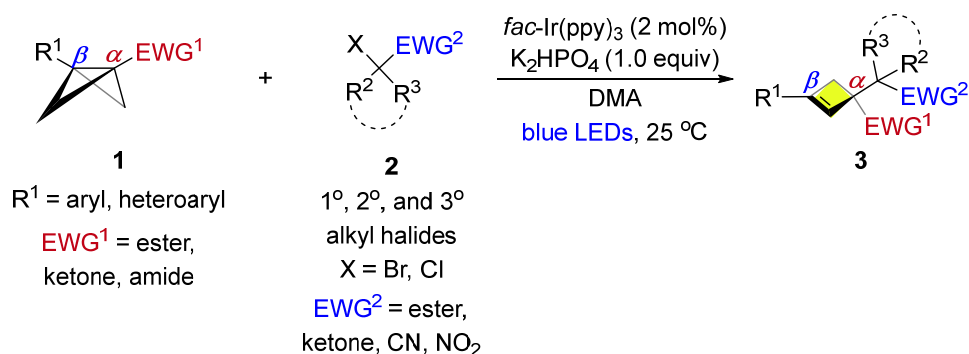

In glove box, to a flame-dried Schlenk tube was charged with the BCB **1** (0.20 mmol), alkyl halide **2** (0.30 mmol, 1.5 equiv), *fac*-Ir(ppy)<sub>3</sub> (4 μmol, 2 mol%), and K<sub>2</sub>HPO<sub>4</sub> (0.20 mmol, 1.0 equiv). The tube was evacuated and backfilled with N<sub>2</sub> (3 times) followed by the addition of the dimethylacetamide (DMA) (2 mL). The reaction mixture was irradiating with 12 W blue LEDs at room temperature for 3 h. Then the reaction mixture was poured into water and then extracted with ethyl acetate (3 × 10 mL). The combined organic layers were washed with brine (2 × 10 mL), dried over anhydrous MgSO<sub>4</sub>, filtered and concentrated under reduced pressure. Purification by flash chromatography on silica gel using petroleum ether/EtOAc (20/1) afforded **3**.

## 5 Procedure for the Radical Ring-Opening Reactions of BCB **1a** with Benzyl Bromide **2w** (Condition B)

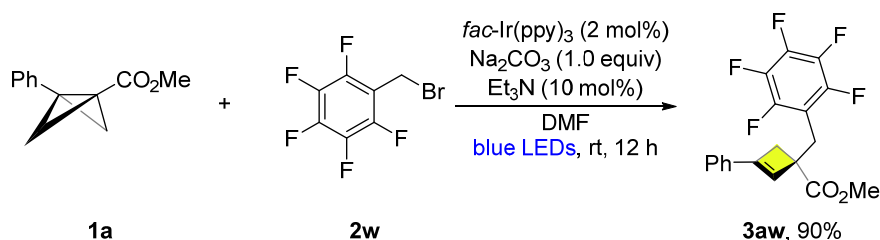

In glove box, to a flame-dried Schlenk tube was charged with the methyl-3-phenylbicyclo[1.1.0]butane-1-carboxylate **1a** (37.6 mg, 0.20 mmol), *fac*-Ir(ppy)<sub>3</sub> (2.6 mg, 4 μmol, 2 mol%) and Na<sub>2</sub>CO<sub>3</sub> (21.2 mg, 0.20 mmol, 1.0 equiv). The tube was evacuated and backfilled with N<sub>2</sub> (3 times). Then, 1-(bromomethyl)-2,3,4,5,6-pentafluorobenzene **2w** (78.3 mg, 0.30 mmol, 1.5 equiv) and Et<sub>3</sub>N (2.0 mg, 0.02 mmol, 10 mol%) were added, followed by the addition of the DMF (2 mL). The reaction mixture was irradiating with 12 W blue LEDs at room temperature for 12 h.

Then the reaction mixture was poured into water and then extracted with ethyl acetate (3 × 10 mL). The combined organic layers were washed with brine (2 × 10 mL), dried over anhydrous MgSO<sub>4</sub>, filtered and concentrated under reduced pressure. Purification by flash chromatography on silica gel using petroleum ether/EtOAc (50/1) afforded **3aw** as a colorless oil (66.3 mg, 90% yield).

## 6 Procedure for the Radical Ring-Opening Reactions of BCB **1a** with $\alpha$ -Chloroacetophenone

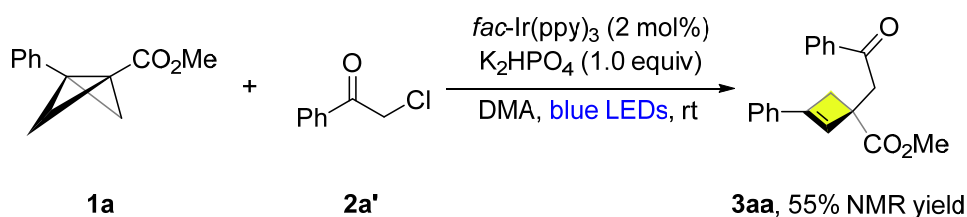

In glove box, to a flame-dried Schlenk tube was charged with the methyl-3-phenylbicyclo[1.1.0]butane-1-carboxylate **1a** (37.6 mg, 0.2 mmol), 2-chloro-1-phenylethan-1-one **2a'** (46.4 mg, 0.3 mmol, 1.5 equiv), *fac*-Ir(ppy)<sub>3</sub> (2.6 mg, 4  $\mu$ mol, 2 mol%), and K<sub>2</sub>HPO<sub>4</sub> (34.8 mg, 0.2 mmol, 1.0 equiv). The tube was evacuated and backfilled with N<sub>2</sub> (3 times) followed by the addition of the DMA (2 mL). The reaction mixture was irradiating with 12 W blue LEDs at room temperature for 3 h. Then the reaction mixture was poured into water and then extracted with ethyl acetate (3 × 10 mL). The combined organic layers was washed with brine (2 × 10 mL) and dried over anhydrous MgSO<sub>4</sub>. The filtrate was concentrated in *vacuo* and analyzed by <sup>1</sup>H NMR spectroscopy to obtain the NMR yield of **3aa** (55% NMR yield) with CH<sub>2</sub>Br<sub>2</sub> as an internal standard. **Note:** Further improvement of the yield was achieved when NaBr was used as additive.

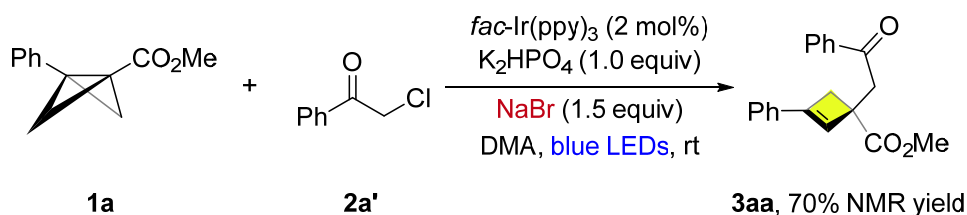

In glove box, to a flame-dried Schlenk tube was charged with the methyl-3-phenylbicyclo[1.1.0]butane-1-carboxylate **1a** (37.6 mg, 0.2 mmol), 2-chloro-1-phenylethan-1-one **2a'** (46.4 mg, 0.3 mmol, 1.5 equiv), *fac*-Ir(ppy)<sub>3</sub> (2.6 mg, 4 μmol, 2 mol%), K<sub>2</sub>HPO<sub>4</sub> (34.8 mg, 0.2 mmol, 1.0 equiv), and NaBr (30.9 mg, 0.3 mmol, 1.5 equiv). The tube was evacuated and backfilled with N<sub>2</sub> (3 times) followed by the addition of the DMA (2 mL). The reaction mixture was irradiating with 12 W blue LEDs at room temperature for 3 h. Then the reaction mixture was poured into water and then extracted with ethyl acetate (3 × 10 mL). The combined organic layers was washed with brine (2 × 10 mL) and dried over anhydrous MgSO<sub>4</sub>. The filtrate was concentrated in *vacuo* and analyzed by <sup>1</sup>H NMR spectroscopy to obtain the NMR yield of **3aa** (70% NMR yield) with CH<sub>2</sub>Br<sub>2</sub> as an internal standard.

## 7 Scale-Up Experiment

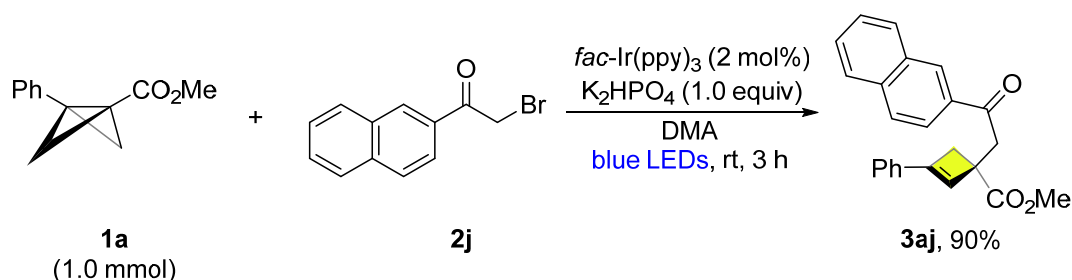

In glove box, to a flame-dried Schlenk tube is charged with the methyl-3-phenylbicyclo[1.1.0]butane-1-carboxylate **1a** (188.2 mg, 1.0 mmol), 2-bromo-1-(naphthalen-2-yl)ethan-1-one **2j** (373.7 mg, 1.5 mmol, 1.5 equiv), *fac*-Ir(ppy)<sub>3</sub> (13.1 mg, 20 μmol, 2 mol%), and K<sub>2</sub>HPO<sub>4</sub> (174.2 mg, 1.0 mmol, 1.0 equiv). The tube is evacuated and backfilled with N<sub>2</sub> (3 times) followed by the addition of the DMA (10 mL). The reaction mixture was irradiating with 12 W blue LEDs at room temperature for 3 h. Then the reaction mixture was poured into water and then extracted with ethyl acetate (3 × 20 mL). The combined organic phase was washed with brine (2 × 20 mL), dried over anhydrous MgSO<sub>4</sub>, filtered and concentrated under reduced pressure. Purification by flash chromatography on silica gel using petroleum ether/EtOAc(20/1) afforded **3aj** as a white solid (320.8 mg, 90% yield).



## 8 Synthetic Transformations

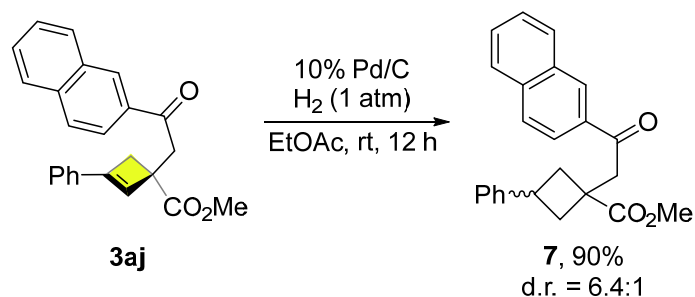

**Synthesis of (7):** To a solution of cyclobutene **3aj** (35.6 mg, 0.1 mmol) in EtOAc (5 mL) was added 10% Pd/C (10 mg). A balloon filled with hydrogen gas was attached to the flask containing the suspension, which was then briefly evacuated and backfilled with hydrogen gas three times. The mixture was stirred overnight at room temperature and filtered through Celite. After the solvent was evaporated in vacuo, the crude material was purified by flash chromatography on silica gel using petroleum ether/EtOAc(20/1) afforded **7** as a colorless oil (32.2 mg, 90% yield, d.r. = 6.4:1).

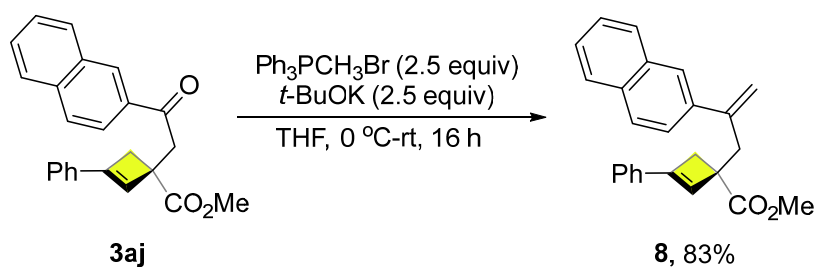

**Synthesis of (8):** To methyl triphenylphosphonium bromide (89.3 mg, 0.25 mmol, 2.5 equiv) charged in a 25 mL oven dried flask was added anhydrous *t*-BuOK/THF (1 M, 2.5 eq). The resulting yellow suspension was stirred at 0 °C for 45 min and a solution of **3aj** (35.6 mg, 0.1 mmol) in THF (1 mL) added dropwise. The resulting mixture was warmed gradually to room temperature and stirred until **3aj** disappeared (monitored by TLC). The reaction mixture was quenched with water, extracted with EtOAc, dried over Na<sub>2</sub>SO<sub>4</sub>, filtered and concentrated in vacuo. The residue was purification by flash chromatography on silica gel using petroleum ether/ EtOAc (10/1) afforded **8** as a colorless oil (30.5 mg, 83% yield).

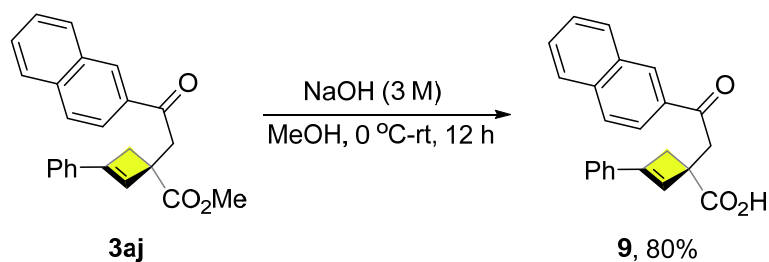

**Synthesis of (9):** A reaction tube was charged with **3aj** (35.6 mg, 0.1 mmol) and MeOH (1 mL) under N<sub>2</sub> atmosphere. 3 M NaOH (0.1 mL, 0.3 mmol, 3.0 equiv) was added to the reaction mixture at 0 °C. The reaction mixture was stirred at room temperature until complete conversion of the starting material as observed from TLC analysis. 3 M HCl was added to acidify the reaction mixture and the resulting solution was extracted with ethyl acetate. The combined organic layers were washed with brine and dried over Na<sub>2</sub>SO<sub>4</sub>. Then, filtered and concentrated under reduced pressure the crude material was purified by flash chromatography on silica gel using petroleum ether/EtOAc (1/2) afforded **9** as a white solid (27.4 mg, 80% yield).

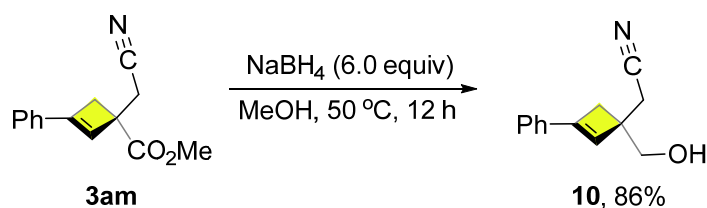

**Synthesis of (10):** **3am** (22.7 mg, 0.1 mmol) was dissolved in MeOH (1.0 mL) at room temperature, and then NaBH<sub>4</sub> (22.7 mg, 0.6 mmol, 6 equiv) was added at the same temperature. The resulting mixture was allowed to warm to 50 °C. After completion, H<sub>2</sub>O was added, and the mixture was extracted with diethyl ether. The combined organic phases were washed with saturated brine and dried over Na<sub>2</sub>SO<sub>4</sub>. Then, filtered and concentrated under reduced pressure, the residue was purification by flash chromatography on silica gel using petroleum ether/ EtOAc (2/1) afforded **10** as a colorless oil (17.3 mg, 86% yield).

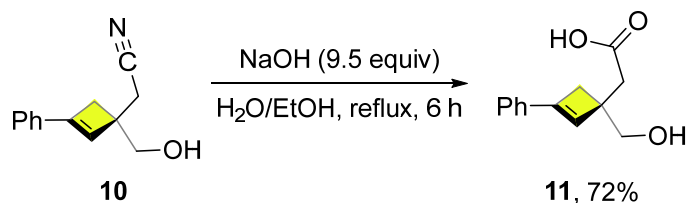

**Synthesis of (11):** **10** (19.9 mg, 0.1 mmol) was dissolved in H<sub>2</sub>O/EtOH (1:1, 2.0 mL) at room temperature, and then NaOH (38.0 mg, 0.95 mmol, 9.5 equiv) was added at the same temperature. The resulting mixture was allowed to warm to reflux. After completion, the reaction was cooled to room temperature. 3 M HCl was added to acidify the reaction mixture and the resulting solution was extracted with ethyl acetate. The combined organic phases were dried over Na<sub>2</sub>SO<sub>4</sub>. Then, filtered and concentrated under reduced pressure, the residue was purification by flash chromatography on silica gel using petroleum ether/ EtOAc (1/3) afforded **11** as a white solid (15.7 mg, 72% yield).

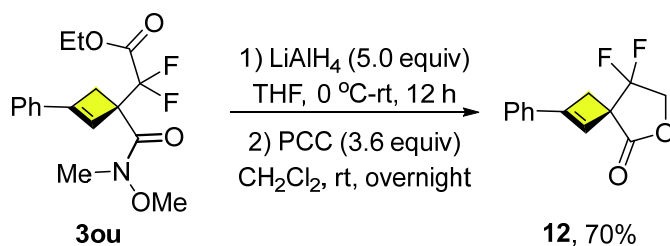

**Synthesis of (12):** A solution of **3ou** (33.9 mg, 0.10 mmol, 1.0 equiv) in THF (1.0 mL) was added dropwise to a suspension of LiAlH<sub>4</sub> (19.0 mg, 0.5 mmol, 5.0 equiv) in THF (1.0 mL) at 0 °C. The mixture was stirred at 0 °C for 12 h (monitored by TLC). The reaction was quenched by addition of aq. NaOH (1 M, 0.3 mL) and water (1.5 mL). The mixture was stirred at room temperature for 30 min and extracted with EtOAc (3 x 10 mL). The organic layers were dried over Na<sub>2</sub>SO<sub>4</sub> and concentrated in *vacuo*. Then, the crude product mixture in CH<sub>2</sub>Cl<sub>2</sub> (1 mL) was added to a mixture of PCC (77.6 mg, 0.36 mmol, 3.6 equiv) and SiO<sub>2</sub> (77.6 mg) in CH<sub>2</sub>Cl<sub>2</sub> (2 mL). The orange mixture was stirred overnight then diluted with Et<sub>2</sub>O (6 mL) and filtered through a celite pad and concentrated in *vacuo*. The residue was purified by flash chromatography on silica gel using petroleum ether/ EtOAc (20/1) afforded **12** as a colorless oil (16.5 mg, 70% yield).

## 9 Mechanism Studies

### 9.1 Radical Trapping Experiments

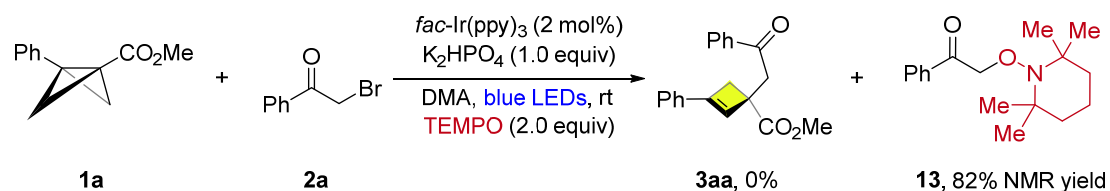

In glove box, to a flame-dried Schlenk tube was charged with the methyl-3-phenylbicyclo[1.1.0]butane-1-carboxylate **1a** (37.6 mg, 0.20 mmol), 2-bromo-1-phenylethan-1-one **2a** (59.7 mg, 0.30 mmol, 1.5 equiv), *fac*-Ir(ppy)<sub>3</sub> (2.6 mg, 4 μmol, 2 mol%), K<sub>2</sub>HPO<sub>4</sub> (34.8 mg, 0.20 mmol, 1.0 equiv), and TEMPO (62.5 mg, 0.4 mmol, 2.0 equiv). The tube was evacuated and backfilled with N<sub>2</sub> (3 times) followed by the addition of the DMA (2 mL). The reaction mixture was irradiating with 12 W blue LEDs at room temperature for 3 h. The reaction was inhibited and the radical trapping product **13** was obtained in 82% NMR yield, which revealed that the transformation was likely to proceed through a radical pathway.

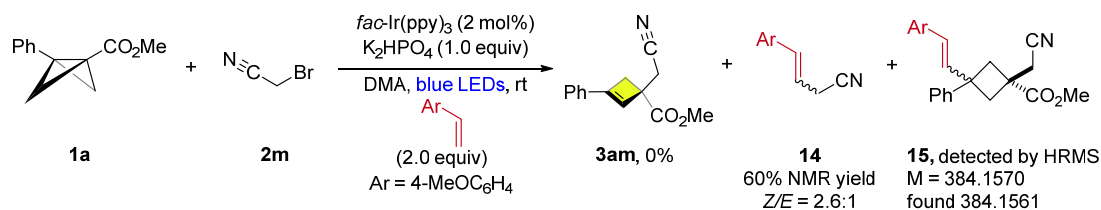

In glove box, to a flame-dried Schlenk tube was charged with the methyl-3-phenylbicyclo[1.1.0]butane-1-carboxylate **1a** (37.6 mg, 0.20 mmol), *fac*-Ir(ppy)<sub>3</sub> (2.6 mg, 4 μmol, 2 mol%), K<sub>2</sub>HPO<sub>4</sub> (34.8 mg, 0.20 mmol, 1.0 equiv). The tube was evacuated and backfilled with N<sub>2</sub> (3 times) followed by the addition of a solution of 2-bromoacetonitrile **2m** (36.0 mg, 0.30 mmol, 1.5 equiv) and 4-methoxystyrene (53 μL, 53.7 mg, 0.40 mmol, 2.0 equiv) in DMA (2 mL). The reaction mixture was irradiating with 12 W blue LEDs at room temperature for 3 h. The aimed cyclobutene **3am** together with **14** and **15** was detected by <sup>1</sup>H NMR and HRMS, indicating that the reaction proceeds via a radical pathway with α-selectivity.

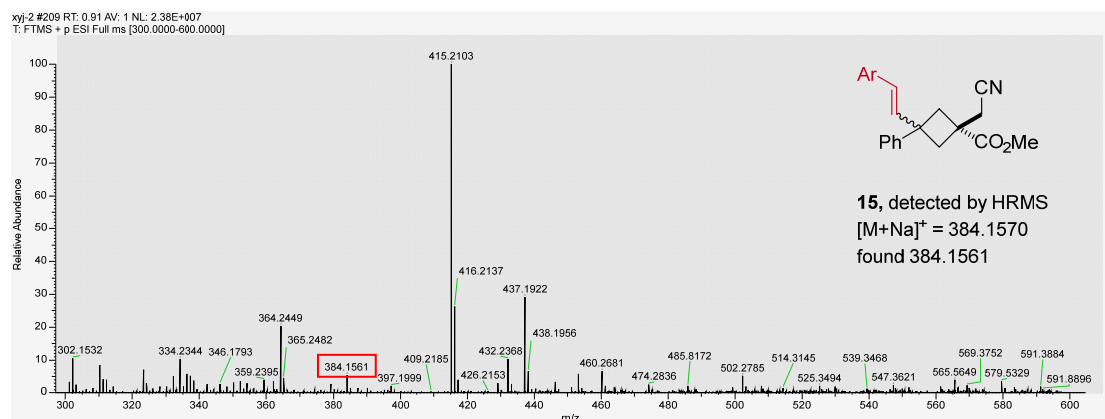

## 9.2 Control Experiments

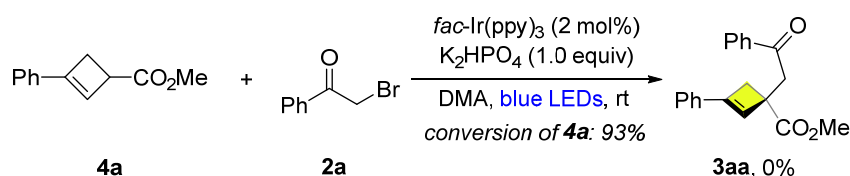

In glove box, to a flame-dried Schlenk tube was charged with the cyclobutene **4a** (18.8 mg, 0.10 mmol), 2-bromo-1-phenylethan-1-one **2a** (29.9 mg, 0.15 mmol, 1.5 equiv), *fac*-Ir(ppy)<sub>3</sub> (1.3 mg, 2 μmol, 2 mol%), and K<sub>2</sub>HPO<sub>4</sub> (17.4 mg, 0.20 mmol, 1.0 equiv). The tube was evacuated and backfilled with N<sub>2</sub> (3 times) followed by the addition of the DMA (2 mL). The reaction mixture was irradiating with 12 W blue LEDs at room temperature for 3 h. The aimed product **3aa** was not detected, which demonstrated that the reaction was not proceeding via the cyclobutene intermediate **4a**.

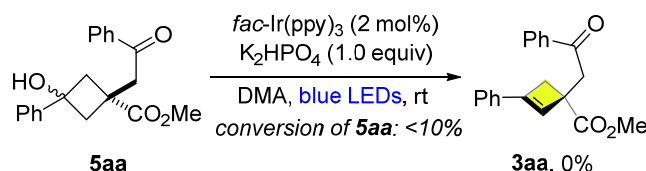

In glove box, to a flame-dried Schlenk tube was charged with the cyclobutane **5aa** (38.7 mg, 0.10 mmol), *fac*-Ir(ppy)<sub>3</sub> (1.3 mg, 2 μmol, 2 mol%), and K<sub>2</sub>HPO<sub>4</sub> (17.4 mg, 0.20 mmol, 1.0 equiv). The tube was evacuated and backfilled with N<sub>2</sub> (3 times)

followed by the addition of the DMA (2 mL). The reaction mixture was irradiating with 12 W blue LEDs at room temperature for 3 h. No desired product was observed.

### 9.3 Light On/Off Experiment

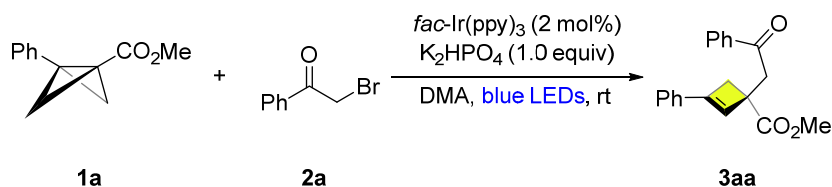

In glove box, to a flame-dried Schlenk tube was charged with the methyl-3-phenylbicyclo[1.1.0]butane-1-carboxylate **1a** (37.6 mg, 0.20 mmol), 2-bromo-1-phenylethan-1-one **2a** (59.7 mg, 0.30 mmol, 1.5 equiv), *fac*-Ir(ppy)<sub>3</sub> (2.6 mg, 4 μmol, 2 mol%), and K<sub>2</sub>HPO<sub>4</sub> (34.8 mg, 0.20 mmol, 1.0 equiv). The tube was evacuated and backfilled with N<sub>2</sub> (3 times) followed by the addition of the DMA (2 mL). The reaction mixture was irradiating with 12 W blue LEDs at room temperature. The light was turned off at intervals of 20 minutes, and the reaction was allowed to stir in the dark for 30 minutes before the LED was turned back on. Five parallel experiments were carried out to fit each point. After the reaction was completed, the reaction mixture was poured into water and then extracted with ethyl acetate (3 × 10 mL). The combined organic phase was washed with brine (2 × 10 mL), dried over anhydrous MgSO<sub>4</sub>, filtered and concentrated under reduced pressure. The yield was calculated by NMR with CH<sub>2</sub>Br<sub>2</sub> as an internal standard.

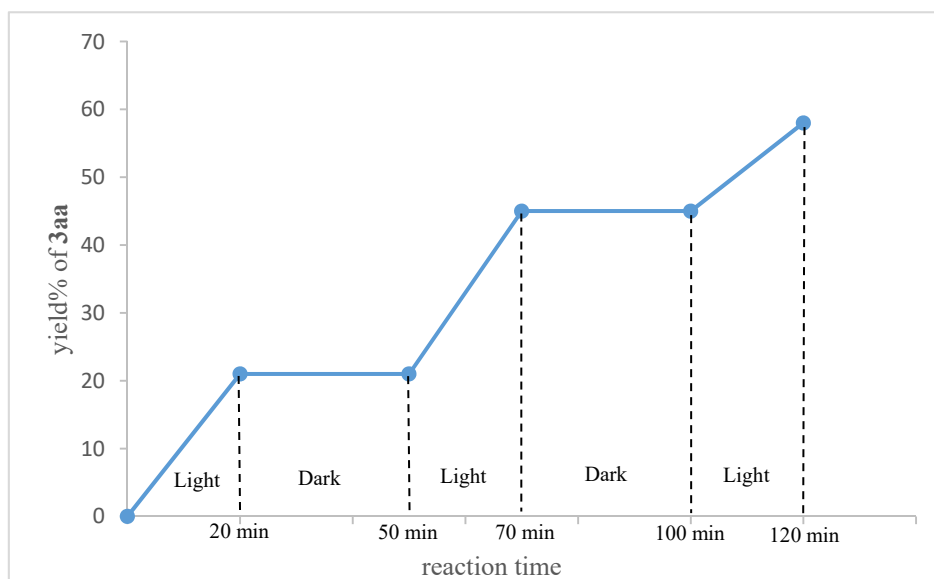

**Figure S1.** Light on/off experiment

#### 9.4 Stern-Volmer Fluorescence Quenching Experiments

Stern-Volmer fluorescence quenching experiments were run with freshly prepared solutions of 0.1 mM *fac*-Ir(ppy)<sub>3</sub> in degassed dry CH<sub>3</sub>CN added the appropriate amount of a quencher in a screw-top quartz cuvette at room temperature. The solutions were irradiated at 395 nm and fluorescence was measured from 450 nm to 650 nm. Control experiments showed that the excited state *fac*-Ir(ppy)<sub>3</sub> was mainly quenched by 2-bromo-1-phenylethan-1-one **2a**

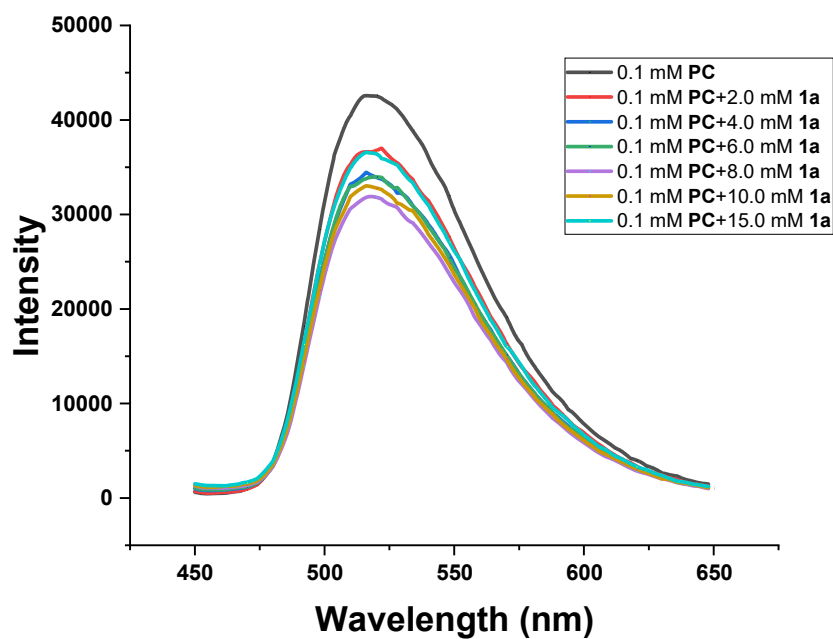

**Figure S2.** Fluorescence quenching experiments date with Ir(ppy)<sub>3</sub> and variable **1a**

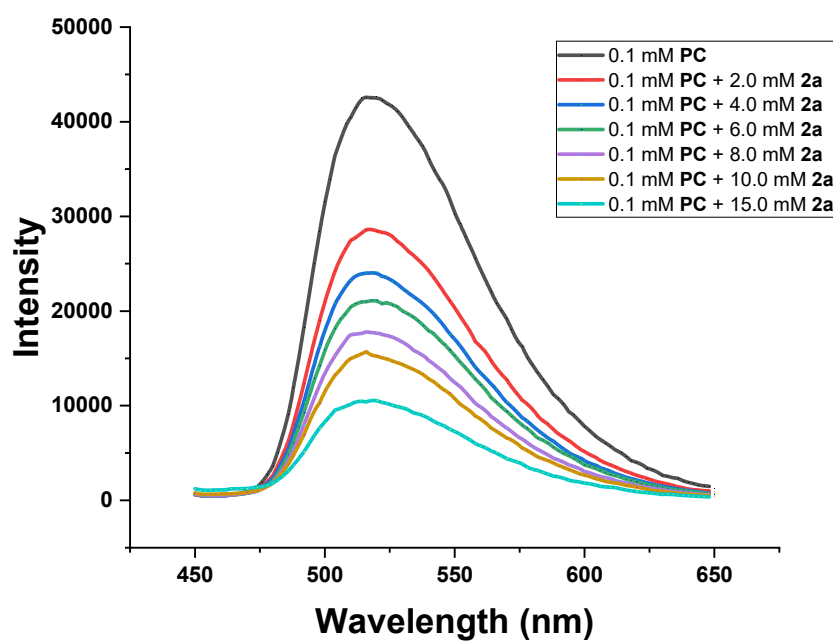

**Figure S3.** Fluorescence quenching experiments date with Ir(ppy)<sub>3</sub> and variable **2a**



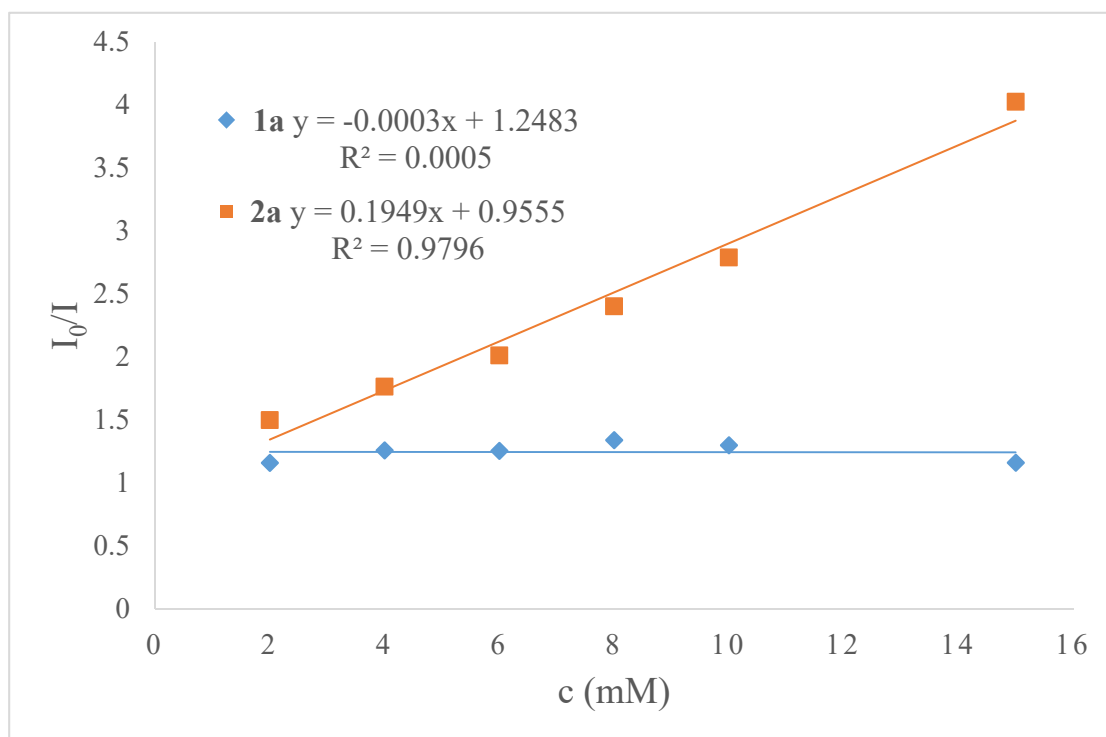

**Figure S4.** Stern-Volmer plots of Ir(ppy)<sub>3</sub> with different quenchers

## 10 Characterization Data of the Products

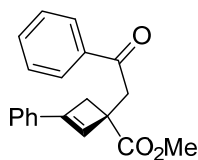

**3aa**

C<sub>20</sub>H<sub>18</sub>O<sub>3</sub>  
M = 306.36 g/mol

### **Methyl-1-(2-oxo-2-phenylethyl)-3-phenylcyclobut-2-ene-1-carboxylate (3aa):**

Prepared from methyl 3-phenylbicyclo[1.1.0]butane-1-carboxylate (**1a**, 37.6 mg, 0.2 mmol) and 2-bromo-1-phenylethan-1-one (**2a**, 59.7 mg, 0.3 mmol) at rt for 3 h according to the **Condition A**. Purification by flash chromatography on silica gel using petroleum ether/EtOAc (20/1) afforded **3aa** as a colorless oil (41.1 mg, 67% yield).

**3aa:** R<sub>f</sub> = 0.45 (petroleum ether/EtOAc = 10/1). **<sup>1</sup>H NMR** (400 MHz, CDCl<sub>3</sub>): δ 7.97 (d, *J* = 7.2 Hz, 2H), 7.56 (t, *J* = 7.2 Hz, 1H), 7.47-7.44 (m, 2H), 7.38-7.26 (m, 5H), 6.51 (s, 1H), 3.73 (d, *J* = 17.2 Hz, 1H), 3.71 (s, 3H), 3.58 (d, *J* = 17.6 Hz, 1H), 3.38 (d, *J* =

13.2 Hz, 1H), 2.74 (d,  $J = 13.2$  Hz, 1H) ppm.  **$^{13}\text{C}$  NMR** (100 MHz,  $\text{CDCl}_3$ ):  $\delta$  198.1, 175.0, 146.8, 136.5, 133.5, 133.2, 128.8, 128.5, 128.4, 128.3, 128.0, 124.8, 52.2, 47.4, 45.1, 38.6 ppm. **HRMS** (ESI)  $m/z$ :  $[\text{M}+\text{Na}]^+$  calcd. for  $\text{C}_{20}\text{H}_{18}\text{O}_3\text{Na}$ : 329.1148; Found: 329.1145.

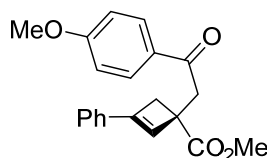**3ab**

$\text{C}_{21}\text{H}_{20}\text{O}_4$   
 $M = 336.39$  g/mol

**Methyl-1-(2-(4-methoxyphenyl)-2-oxoethyl)-3-phenylcyclobut-2-ene-1-carboxylate**

**(3ab)**: Prepared from methyl 3-phenylbicyclo[1.1.0]butane-1-carboxylate (**1a**, 37.6 mg, 0.2 mmol) and 2-bromo-1-(4-methoxyphenyl)ethan-1-one (**2b**, 68.7 mg, 0.3 mmol) at rt for 3 h according to the **Condition A**. Purification by flash chromatography on silica gel using petroleum ether/EtOAc (20/1) afforded **3ab** as a colorless oil (40.4 mg, 60% yield).

**3ab**:  $R_f = 0.4$  (petroleum ether/EtOAc = 10/1).  **$^1\text{H}$  NMR** (400 MHz,  $\text{CDCl}_3$ ):  $\delta$  7.95 (d,  $J = 8.4$  Hz, 2H), 7.38-7.26 (m, 5H), 6.93 (d,  $J = 8.8$  Hz, 2H), 6.50 (s, 1H), 3.86 (s, 3H), 3.71 (s, 3H), 3.68 (d,  $J = 17.6$  Hz, 1H), 3.53 (d,  $J = 17.6$  Hz, 1H), 3.37 (d,  $J = 13.2$  Hz, 1H), 2.73 (d,  $J = 13.2$  Hz, 1H) ppm.  **$^{13}\text{C}$  NMR** (100 MHz,  $\text{CDCl}_3$ ):  $\delta$  196.6, 175.1, 163.6, 146.7, 133.6, 130.3, 129.7, 129.0, 128.42, 128.36, 124.8, 113.7, 55.4, 52.2, 47.5, 44.8, 38.6 ppm. **HRMS** (ESI)  $m/z$ :  $[\text{M}+\text{Na}]^+$  calcd. for  $\text{C}_{21}\text{H}_{20}\text{O}_4\text{Na}$ : 359.1254; Found: 359.1258.

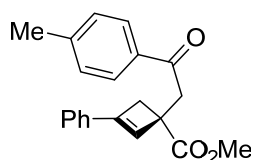**3ac**

$\text{C}_{21}\text{H}_{20}\text{O}_3$   
 $M = 320.39$  g/mol

**Methyl-1-(2-oxo-2-(p-tolyl)ethyl)-3-phenylcyclobut-2-ene-1-carboxylate (3ac):**

Prepared from methyl 3-phenylbicyclo[1.1.0]butane-1-carboxylate (**1a**, 37.6 mg, 0.2 mmol) and 2-bromo-1-(p-tolyl)ethan-1-one (**2c**, 63.9 mg, 0.3 mmol) at rt for 3 h according to the **Condition A**. Purification by flash chromatography on silica gel using petroleum ether/EtOAc (20/1) afforded **3ac** as a white solid (48.7 mg, 76% yield).

**3ac:**  $R_f$  = 0.40 (petroleum ether/EtOAc = 10/1).  $^1\text{H NMR}$  (400 MHz,  $\text{CDCl}_3$ ):  $\delta$  7.87 (d,  $J$  = 8.0 Hz, 2H), 7.38-7.24 (m, 7H), 6.50 (s, 1H), 3.71 (s, 3H), 3.70 (d,  $J$  = 17.6 Hz, 1H), 3.56 (d,  $J$  = 17.6 Hz, 1H), 3.37 (d,  $J$  = 13.2 Hz, 1H), 2.73 (d,  $J$  = 13.2 Hz, 1H), 2.40 (s, 3H) ppm.  $^{13}\text{C NMR}$  (100 MHz,  $\text{CDCl}_3$ ):  $\delta$  197.7, 175.0, 146.7, 144.0, 134.1, 133.6, 129.2, 128.9, 128.4, 128.3, 128.1, 124.8, 52.2, 47.4, 45.0, 38.6, 21.6 ppm.

**HRMS** (ESI)  $m/z$ :  $[\text{M}+\text{Na}]^+$  calcd. for  $\text{C}_{21}\text{H}_{20}\text{O}_3\text{Na}$ : 343.1305; Found: 343.1306.

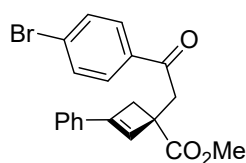**3ad**

$\text{C}_{20}\text{H}_{17}\text{BrO}_3$   
M = 385.26 g/mol

**Methyl-1-(2-(4-bromophenyl)-2-oxoethyl)-3-phenylcyclobut-2-ene-1-carboxylate**

(**3ad**): Prepared from methyl 3-phenylbicyclo[1.1.0]butane-1-carboxylate (**1a**, 37.6 mg, 0.2 mmol) and 2-bromo-1-(4-bromophenyl)ethan-1-one (**2d**, 83.4 mg, 0.3 mmol) at rt for 3 h according to the **Condition A**. Purification by flash chromatography on silica gel using petroleum ether/EtOAc (20/1) afforded **3ad** as a colorless oil (43.9 mg, 57% yield).

**3ad:**  $R_f$  = 0.50 (petroleum ether/EtOAc = 10/1).  $^1\text{H NMR}$  (400 MHz,  $\text{CDCl}_3$ ):  $\delta$  7.83 (d,  $J$  = 8.8 Hz, 2H), 7.60 (d,  $J$  = 8.8 Hz, 2H), 7.38-7.28 (m, 5H), 6.49 (s, 1H), 3.71 (s, 3H), 3.69 (d,  $J$  = 18.8 Hz, 1H), 3.53 (d,  $J$  = 17.6 Hz, 1H), 3.37 (d,  $J$  = 13.2 Hz, 1H), 2.74 (d,  $J$  = 13.2 Hz, 1H) ppm.  $^{13}\text{C NMR}$  (100 MHz,  $\text{CDCl}_3$ ):  $\delta$  197.1, 174.9, 146.9, 135.2,

133.5, 131.9, 129.5, 128.7, 128.5, 128.41, 128.39, 124.8, 52.3, 47.3, 45.0, 38.6 ppm.

**HRMS** (ESI)  $m/z$ :  $[M+Na]^+$  calcd. for  $C_{20}H_{17}BrO_3Na$ : 407.0253; Found: 407.0252.

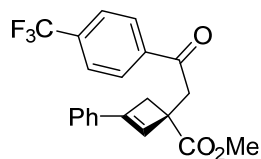

**3ae**

$C_{21}H_{17}F_3O_3$   
M = 374.36 g/mol

**Methyl-1-(2-oxo-2-(4-(trifluoromethyl)phenyl)ethyl)-3-phenylcyclobut-2-ene-1-carboxylate (3ae)**: Prepared from methyl 3-phenylbicyclo[1.1.0]butane-1-carboxylate (**1a**, 37.6 mg, 0.2 mmol) and 2-bromo-1-(4-(trifluoromethyl)phenyl)ethan-1-one (**2e**, 80.1 mg, 0.3 mmol) at rt for 3 h according to the **Condition A**. Purification by flash chromatography on silica gel using petroleum ether/EtOAc (20/1) afforded **3ae** as a colorless oil (41.2 mg, 55% yield).

**3ae**:  $R_f$  = 0.35 (petroleum ether/EtOAc = 10/1).  **$^1H$  NMR** (400 MHz,  $CDCl_3$ ):  $\delta$  8.08 (d,  $J$  = 8.0 Hz, 2H), 7.74 (d,  $J$  = 8.0 Hz, 2H), 7.39-7.29 (m, 5H), 6.51 (s, 1H), 3.74 (d,  $J$  = 18.4 Hz, 1H), 3.72 (s, 3H), 3.58 (d,  $J$  = 18.0 Hz, 1H), 3.39 (d,  $J$  = 13.2 Hz, 1H), 2.76 (d,  $J$  = 13.2 Hz, 1H) ppm.  **$^{13}C$  NMR** (100 MHz,  $CDCl_3$ ):  $\delta$  197.3, 174.8, 147.1, 139.2, 134.5 (q,  $J$  = 32.5 Hz), 133.4, 128.6, 128.5, 128.42, 128.37, 125.7 (q,  $J$  = 3.6 Hz), 124.8, 123.5 (q,  $J$  = 271.0 Hz), 52.3, 47.4, 45.3, 38.7 ppm.  **$^{19}F$  NMR** (376 MHz,  $CDCl_3$ )  $\delta$  -63.12 ppm. **HRMS** (ESI)  $m/z$ :  $[M+Na]^+$  calcd. for  $C_{21}H_{17}F_3O_3Na$ : 309.1022; Found: 309.1021.

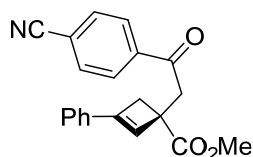

**3af**

$C_{21}H_{17}NO_3$   
M = 331.37 g/mol

**Methyl-1-(2-(4-cyanophenyl)-2-oxoethyl)-3-phenylcyclobut-2-ene-1-carboxylate**

(**3af**): Prepared from methyl 3-phenylbicyclo[1.1.0]butane-1-carboxylate (**1a**, 37.6 mg,

0.2 mmol) and 4-(2-bromoacetyl)benzonitrile (**2f**, 67.2 mg, 0.3 mmol) at rt for 3 h according to the **Condition A**. Purification by flash chromatography on silica gel using petroleum ether/EtOAc (20/1) afforded **3af** as a colorless oil (36.5 mg, 55% yield).

**3af**:  $R_f$  = 0.35 (petroleum ether/EtOAc = 10/1).  $^1\text{H NMR}$  (400 MHz,  $\text{CDCl}_3$ ):  $\delta$  8.06 (d,  $J$  = 8.0 Hz, 2H), 7.78 (d,  $J$  = 8.0 Hz, 2H), 7.39-7.31 (m, 5H), 6.50 (s, 1H), 3.73 (d,  $J$  = 15.2 Hz, 1H), 3.71 (s, 3H), 3.56 (d,  $J$  = 18.0 Hz, 1H), 3.38 (d,  $J$  = 13.2 Hz, 1H), 2.76 (d,  $J$  = 13.2 Hz, 1H) ppm.  $^{13}\text{C NMR}$  (100 MHz,  $\text{CDCl}_3$ ):  $\delta$  196.9, 174.8, 147.1, 139.4, 133.3, 132.5, 128.6, 128.42, 128.41, 128.3, 124.8, 117.9, 116.4, 52.3, 47.3, 45.2, 38.6 ppm. **HRMS** (ESI)  $m/z$ :  $[\text{M}+\text{Na}]^+$  calcd. for  $\text{C}_{21}\text{H}_{17}\text{NO}_3\text{Na}$ : 354.1101; Found: 354.1103.

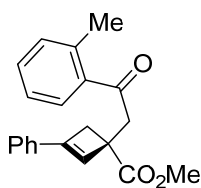

**3ag**  
 $\text{C}_{21}\text{H}_{20}\text{O}_3$   
 $M = 320.39 \text{ g/mol}$

**Methyl-1-(2-oxo-2-(o-tolyl)ethyl)-3-phenylcyclobut-2-ene-1-carboxylate (3ag)**: Prepared from methyl 3-phenylbicyclo[1.1.0]butane-1-carboxylate (**1a**, 37.6 mg, 0.2 mmol) and 2-bromo-1-(o-tolyl)ethan-1-one (**2g**, 63.9 mg, 0.3 mmol) at rt for 3 h according to the **Condition A**. Purification by flash chromatography on silica gel using petroleum ether/EtOAc (20/1) afforded **3ag** as a colorless oil (40.4 mg, 63% yield).

**3ag**:  $R_f$  = 0.40 (petroleum ether/EtOAc = 10/1).  $^1\text{H NMR}$  (400 MHz,  $\text{CDCl}_3$ ):  $\delta$  7.70 (d,  $J$  = 7.6 Hz, 1H), 7.39-7.23 (m, 8H), 6.50 (s, 1H), 3.71 (s, 3H), 3.64 (d,  $J$  = 17.6 Hz, 1H), 3.50 (d,  $J$  = 17.6 Hz, 1H), 3.37 (d,  $J$  = 13.2 Hz, 1H), 2.74 (d,  $J$  = 13.2 Hz, 1H), 2.51 (s, 3H) ppm.  $^{13}\text{C NMR}$  (100 MHz,  $\text{CDCl}_3$ ):  $\delta$  202.1, 175.0, 146.8, 138.3, 137.3, 133.6, 131.9, 131.4, 128.9, 128.6, 128.5, 128.4, 125.6, 124.8, 52.2, 47.8, 47.7, 38.7,

21.3 ppm. **HRMS** (ESI)  $m/z$ :  $[M+Na]^+$  calcd. for  $C_{21}H_{20}O_3Na$ : 343.1305; Found: 343.1303.

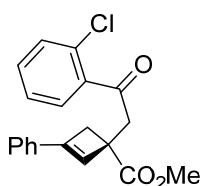

**3ah**  
 $C_{20}H_{17}ClO_3$   
 M = 340.80 g/mol

**Methyl-1-(2-(2-chlorophenyl)-2-oxoethyl)-3-phenylcyclobut-2-ene-1-carboxylate**

(**3ah**): Prepared from methyl 3-phenylbicyclo[1.1.0]butane-1-carboxylate (**1a**, 37.6 mg, 0.2 mmol) and 2-bromo-1-(2-chlorophenyl)ethan-1-one (**2h**, 70.0 mg, 0.3 mmol) at rt for 3 h according to the **Condition A**. Purification by flash chromatography on silica gel using petroleum ether/EtOAc (20/1) afforded **3ah** as a colorless oil (42.3 mg, 62% yield).

**3ah**:  $R_f$  = 0.35 (petroleum ether/EtOAc = 10/1).  **$^1H$  NMR** (400 MHz,  $CDCl_3$ ):  $\delta$  7.59-7.57 (m, 1H), 7.41-7.31 (m, 8H), 6.50 (s, 1H), 3.72 (s, 3H), 3.68 (d,  $J$  = 18.0 Hz, 1H), 3.55 (d,  $J$  = 18.0 Hz, 1H), 3.36 (d,  $J$  = 13.2 Hz, 1H), 2.77 (d,  $J$  = 13.2 Hz, 1H) ppm.  **$^{13}C$  NMR** (100 MHz,  $CDCl_3$ ):  $\delta$  201.0, 174.8, 147.0, 138.7, 133.5, 131.9, 131.1, 130.6, 129.3, 128.6, 128.5, 128.4, 126.9, 124.9, 52.3, 49.1, 47.8, 38.7 ppm. **HRMS** (ESI)  $m/z$ :  $[M+Na]^+$  calcd. for  $C_{20}H_{17}ClO_3Na$ : 363.0758; Found: 363.0760.

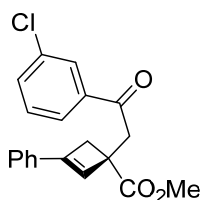

**3ai**  
 $C_{20}H_{17}ClO_3$   
 M = 340.80 g/mol

**Methyl-1-(2-(2-chlorophenyl)-2-oxoethyl)-3-phenylcyclobut-2-ene-1-carboxylate**

(**3ai**): Prepared from methyl 3-phenylbicyclo[1.1.0]butane-1-carboxylate (**1a**, 37.6 mg, 0.2 mmol) and 2-bromo-1-(2-chlorophenyl)ethan-1-one (**2i**, 70.0 mg, 0.3 mmol) at rt

for 3 h according to the **Condition A**. Purification by flash chromatography on silica gel using petroleum ether/EtOAc (20/1 to 10/1) afforded **3ai** as a colorless oil (47.8 mg, 70% yield).

**3ai**:  $R_f$  = 0.35 (petroleum ether/EtOAc = 10/1).  $^1\text{H NMR}$  (400 MHz,  $\text{CDCl}_3$ ):  $\delta$  7.94 (s, 1H), 7.84 (d,  $J$  = 8.0 Hz, 1H), 7.53 (d,  $J$  = 8.0 Hz, 1H), 7.42-7.29 (m, 6H), 6.49 (s, 1H), 3.71 (s, 3H), 3.68 (d,  $J$  = 16.8 Hz, 1H), 3.53 (d,  $J$  = 18.0 Hz, 1H), 3.37 (d,  $J$  = 13.2 Hz, 1H), 2.74 (d,  $J$  = 13.2 Hz, 1H) ppm.  $^{13}\text{C NMR}$  (100 MHz,  $\text{CDCl}_3$ ):  $\delta$  196.9, 174.8, 147.0, 138.1, 134.9, 133.5, 133.1, 129.9, 128.6, 128.5, 128.4, 128.2, 126.1, 124.8, 52.2, 47.4, 45.1, 38.7 ppm. **HRMS** (ESI)  $m/z$ :  $[\text{M}+\text{Na}]^+$  calcd. for  $\text{C}_{20}\text{H}_{17}\text{ClO}_3\text{Na}$ : 363.0758; Found: 363.0753.

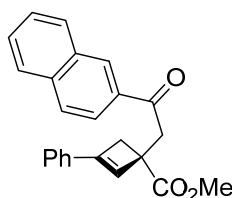

**3aj**  
 $\text{C}_{24}\text{H}_{20}\text{O}_3$   
 $M = 356.42 \text{ g/mol}$

#### Methyl-1-(2-(naphthalen-2-yl)-2-oxoethyl)-3-phenylcyclobut-2-ene-1-carboxylate

**3aj**: Prepared from methyl 3-phenylbicyclo[1.1.0]butane-1-carboxylate (**1a**, 37.6 mg, 0.2 mmol) and 2-bromo-1-(naphthalen-2-yl)ethan-1-one (**2j**, 74.7 mg, 0.3 mmol) at rt for 3 h according to the **Condition A**. Purification by flash chromatography on silica gel using petroleum ether/EtOAc (20/1) afforded **3aj** as a white solid (64.9 mg, 91% yield).

**3aj**:  $R_f$  = 0.40 (petroleum ether/EtOAc = 10/1).  $^1\text{H NMR}$  (400 MHz,  $\text{CDCl}_3$ ):  $\delta$  8.49 (s, 1H), 8.03 (d,  $J$  = 8.8 Hz, 1H), 7.94 (d,  $J$  = 8.0 Hz, 1H), 7.87 (t,  $J$  = 8.4 Hz, 2H), 7.60-7.52 (m, 2H), 7.39-7.24 (m, 5H), 6.55 (s, 1H), 3.86 (d,  $J$  = 17.6 Hz, 1H), 3.72 (s, 3H), 3.71 (d,  $J$  = 17.6 Hz, 1H), 3.41 (d,  $J$  = 13.2 Hz, 1H), 2.79 (d,  $J$  = 13.2 Hz, 1H) ppm.  $^{13}\text{C NMR}$  (100 MHz,  $\text{CDCl}_3$ ):  $\delta$  198.0, 175.1, 146.8, 135.6, 133.9, 133.6, 132.4, 129.8, 129.5, 128.9, 128.5, 128.43, 128.38, 127.8, 126.8, 124.8, 123.7, 52.2, 47.6, 45.2,

38.7 ppm. **HRMS** (ESI)  $m/z$ :  $[M+Na]^+$  calcd. for  $C_{24}H_{20}O_3Na$ : 379.1305; Found: 379.1305.

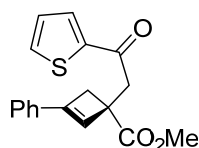

**3ak**  
 $C_{18}H_{16}O_3S$   
 $M = 312.38$  g/mol

**Methyl-1-(2-oxo-2-(thiophen-2-yl)ethyl)-3-phenylcyclobut-2-ene-1-carboxylate**

(**3ak**): Prepared from methyl 3-phenylbicyclo[1.1.0]butane-1-carboxylate (**1a**, 37.6 mg, 0.2 mmol) and 2-bromo-1-(thiophen-2-yl)ethan-1-one (**2k**, 61.5 mg, 0.3 mmol) at rt for 3 h according to the **Condition A**. Purification by flash chromatography on silica gel using petroleum ether/EtOAc (20/1) afforded **3ak** as a colorless oil (35.6 mg, 57% yield).

**3ak**:  $R_f = 0.45$  (petroleum ether/EtOAc = 10/1).  $^1H$  NMR (400 MHz,  $CDCl_3$ ):  $\delta$  7.73 (d,  $J = 3.6$  Hz, 1H), 7.63 (d,  $J = 4.8$  Hz, 1H), 7.38-7.26 (m, 5H), 7.13 (t,  $J = 4.4$  Hz, 1H), 6.50 (s, 1H), 3.70 (s, 3H), 3.66 (d,  $J = 17.2$  Hz, 1H), 3.50 (d,  $J = 17.2$  Hz, 1H), 3.35 (d,  $J = 13.2$  Hz, 1H), 2.77 (d,  $J = 13.2$  Hz, 1H) ppm.  $^{13}C$  NMR (100 MHz,  $CDCl_3$ ):  $\delta$  190.9, 174.8, 146.8, 143.8, 133.63, 133.55, 132.0, 128.8, 128.5, 128.4, 128.1, 124.8, 52.2, 47.5, 45.6, 38.7 ppm. **HRMS** (ESI)  $m/z$ :  $[M+Na]^+$  calcd. for  $C_{18}H_{16}O_3SNa$ : 355.0712; Found: 355.0712.

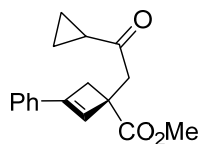

**3al**  
 $C_{17}H_{18}O_3$   
 $M = 270.33$  g/mol

**Methyl-1-(2-cyclopropyl-2-oxoethyl)-3-phenylcyclobut-2-ene-1-carboxylate**

(**3al**): Prepared from methyl 3-phenylbicyclo[1.1.0]butane-1-carboxylate (**1a**, 37.6 mg, 0.2 mmol) and 2-bromo-1-cyclopropylethan-1-one (**2l**, 48.9 mg, 0.3 mmol) at rt for 3 h



according to the **Condition A**. Purification by flash chromatography on silica gel using petroleum ether/EtOAc (20/1) afforded **3a** as a colorless oil (23.8 mg, 44% yield).

**3a**:  $R_f$  = 0.5 (petroleum ether/EtOAc = 10/1).  $^1\text{H NMR}$  (400 MHz,  $\text{CDCl}_3$ ):  $\delta$  7.36-7.32 (m, 4H), 7.30-7.26 (m, 1H), 6.42 (s, 1H), 3.69 (s, 3H), 3.31 (d,  $J$  = 18.0 Hz, 1H), 3.27 (d,  $J$  = 13.2 Hz, 1H), 3.14 (d,  $J$  = 17.2 Hz, 1H), 2.65 (d,  $J$  = 13.2 Hz, 1H), 1.97-1.91 (m, 1H), 1.07-1.03 (m, 2H), 0.91- 0.86 (m, 2H) ppm.  $^{13}\text{C NMR}$  (100 MHz,  $\text{CDCl}_3$ ):  $\delta$  208.7, 174.9, 146.6, 133.6, 128.8, 128.4, 128.3, 124.8, 52.1, 49.3, 47.3, 38.6, 20.6, 10.7 ppm. **HRMS** (ESI)  $m/z$ :  $[\text{M}+\text{Na}]^+$  calcd. for  $\text{C}_{17}\text{H}_{18}\text{O}_3\text{Na}$ : 293.1148; Found: 293.1148.

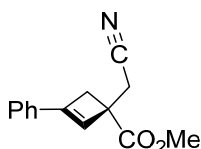

**3am**  
 $\text{C}_{14}\text{H}_{13}\text{NO}_2$   
 $M = 227.26 \text{ g/mol}$

**Methyl-1-(cyanomethyl)-3-phenylcyclobut-2-ene-1-carboxylate (3am)**: Prepared from methyl 3-phenylbicyclo[1.1.0]butane-1-carboxylate (**1a**, 37.6 mg, 0.2 mmol) and 2-bromoacetonitrile (**2m**, 36.0 mg, 0.3 mmol) at rt for 3 h according to the **Condition A**. Purification by flash chromatography on silica gel using petroleum ether/EtOAc (20/1) afforded **3am** as a white solid (27.7 mg, 61% yield).

**3am**:  $R_f$  = 0.40 (petroleum ether/EtOAc = 10/1).  $^1\text{H NMR}$  (400 MHz,  $\text{CDCl}_3$ ):  $\delta$  7.40-7.32 (m, 5H), 6.34 (s, 1H), 3.76 (s, 3H), 3.31 (d,  $J$  = 13.2 Hz, 1H), 2.99 (d,  $J$  = 16.4 Hz, 1H), 2.93 (d,  $J$  = 16.8 Hz, 1H), 2.84 (d,  $J$  = 13.2 Hz, 1H) ppm.  $^{13}\text{C NMR}$  (100 MHz,  $\text{CDCl}_3$ ):  $\delta$  172.8, 148.7, 132.6, 129.1, 128.5, 126.0, 125.0, 117.3, 52.7, 47.1, 38.1, 24.2 ppm. **HRMS** (ESI)  $m/z$ :  $[\text{M}+\text{Na}]^+$  calcd. for  $\text{C}_{14}\text{H}_{13}\text{O}_2\text{Na}$ : 250.0838; Found: 250.0838.

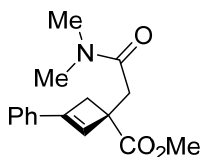**3an**

$C_{16}H_{19}NO_3$   
 $M = 273.33 \text{ g/mol}$

**Methyl-1-(2-(dimethylamino)-2-oxoethyl)-3-phenylcyclobut-2-ene-1-carboxylate**

**(3an)**: Prepared from methyl 3-phenylbicyclo[1.1.0]butane-1-carboxylate (**1a**, 37.6 mg, 0.2 mmol) and 2-bromo-*N,N*-dimethylacetamide (**2n**, 49.8 mg, 0.3 mmol) at rt for 3 h according to the **Condition A**. Purification by flash chromatography on silica gel using petroleum ether/EtOAc (10/1) afforded **3an** as a colorless oil (24.6 mg, 45% yield).

**3an**:  $R_f = 0.25$  (petroleum ether/EtOAc = 10/1).  **$^1H$  NMR** (400 MHz,  $CDCl_3$ ):  $\delta$  7.38-7.32 (m, 4H), 7.30-7.26 (m, 1H), 6.50 (s, 1H), 3.72 (s, 3H), 3.29 (d,  $J = 13.2 \text{ Hz}$ , 1H), 3.07 (d,  $J = 16.4 \text{ Hz}$ , 1H), 3.00 (s, 3H), 2.95 (s, 3H), 2.88 (d,  $J = 16.0 \text{ Hz}$ , 1H), 2.69 (d,  $J = 13.2 \text{ Hz}$ , 1H) ppm.  **$^{13}C$  NMR** (100 MHz,  $CDCl_3$ ):  $\delta$  175.4, 170.7, 146.4, 133.7, 129.4, 128.3, 124.7, 52.2, 47.9, 40.2, 38.4, 37.0, 35.1 ppm. **HRMS** (ESI)  $m/z$ :  $[M+Na]^+$  calcd. for  $C_{16}H_{19}NO_3Na$ : 296.1257; Found: 296.1255.

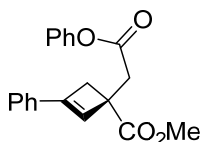**3ao**

$C_{20}H_{18}O_4$   
 $M = 322.36 \text{ g/mol}$

**Methyl-1-(2-oxo-2-phenoxyethyl)-3-phenylcyclobut-2-ene-1-carboxylate (3ao)**:

Prepared from methyl 3-phenylbicyclo[1.1.0]butane-1-carboxylate (**1a**, 37.6 mg, 0.2 mmol) and phenyl 2-bromoacetate (**2o**, 64.5 mg, 0.3 mmol) at rt for 3 h according to the **Condition A**. Purification by flash chromatography on silica gel using petroleum ether/EtOAc (20/1) afforded **3ao** as a colorless oil (40.0 mg, 62% yield).

**3ao**:  $R_f$  = 0.40 (petroleum ether/EtOAc = 10/1).  $^1\text{H NMR}$  (400 MHz,  $\text{CDCl}_3$ ):  $\delta$  7.40-7.30 (m, 7H), 7.24-7.19 (m, 1H), 7.11-7.08 (m, 2H), 6.50 (s, 1H), 3.73 (s, 3H), 3.34 (d,  $J$  = 13.2 Hz, 1H), 3.24 (d,  $J$  = 16.8 Hz, 1H), 3.10 (d,  $J$  = 16.4 Hz, 1H), 2.84 (d,  $J$  = 13.2 Hz, 1H) ppm.  $^{13}\text{C NMR}$  (100 MHz,  $\text{CDCl}_3$ ):  $\delta$  174.4, 170.1, 150.5, 147.3, 133.3, 129.3, 128.7, 128.4, 128.2, 125.8, 124.9, 121.5, 52.3, 47.5, 40.7, 38.5 ppm. **HRMS** (ESI)  $m/z$ :  $[\text{M}+\text{Na}]^+$  calcd. for  $\text{C}_{20}\text{H}_{18}\text{O}_4\text{Na}$ : 345.1097; Found: 345.1095.

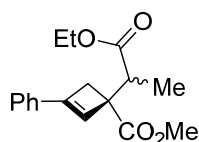

**3ap**  
 $\text{C}_{17}\text{H}_{20}\text{O}_4$   
 $M = 288.34 \text{ g/mol}$

#### Methyl-1-(1-ethoxy-1-oxopropan-2-yl)-3-phenylcyclobut-2-ene-1-carboxylate

**(3ap)**: Prepared from methyl 3-phenylbicyclo[1.1.0]butane-1-carboxylate (**1a**, 37.6 mg, 0.2 mmol) and ethyl 2-bromopropanoate (**2p**, 54.3 mg, 0.3 mmol) at rt for 3 h according to the **Condition A**. Purification by flash chromatography on silica gel using petroleum ether/EtOAc (20/1) afforded **3ap** as a colorless oil (31.1 mg, 54% yield, d.r. = 1.7:1). The diastereomer of **3ap** cannot be separated by chromatography. Additionally, the diastereomer of **3ap** exhibits slight chemical shifts, making it difficult to determine the major diastereomer. Treatment of **3ap** (dr = 1.7:1) with either conditions A or  $\text{K}_2\text{HPO}_4$  did not result in any changes to the diastereomeric ratio of **3ap**. The low diastereomeric ratio of **3ap** may be attributed to inadequate selectivity in the elimination reaction facilitated by the base.

**3ap**:  $R_f$  = 0.35 (petroleum ether/EtOAc = 10/1). For major diastereomer:  $^1\text{H NMR}$  (400 MHz,  $\text{CDCl}_3$ ):  $\delta$  7.39-7.29 (m, 5H), 6.38 (s, 1H), 4.20-4.09 (m, 2H), 3.70 (s, 3H), 3.14-3.07 (m, 2H), 2.94 (d,  $J$  = 13.2 Hz, 1H), 1.27-1.21 (m, 6H) ppm. For minor diastereomer:  $^1\text{H NMR}$  (400 MHz,  $\text{CDCl}_3$ ):  $\delta$  7.39-7.29 (m, 5H), 6.33 (s, 1H), 4.20-4.09 (m, 2H), 3.70 (s, 3H), 3.27 (d,  $J$  = 13.2 Hz, 1H), 3.14-3.07 (m, 1H), 2.82 (d,  $J$  = 13.2 Hz, 1H), 1.27-1.21 (m, 6H) ppm.  $^{13}\text{C NMR}$  (100 MHz,  $\text{CDCl}_3$ ):  $\delta$  174.5, 174.3, 174.21, 174.17, 147.8, 147.2, 133.3, 128.50, 128.45, 128.3, 127.8, 127.1, 124.83,

124.80, 60.5, 60.4, 52.8, 52.3, 52.0, 43.6, 43.3, 36.5, 34.9, 14.2, 12.6, 12.3 ppm.

**HRMS** (ESI)  $m/z$ :  $[M+Na]^+$  calcd. for  $C_{17}H_{20}O_4Na$ : 311.1254; Found: 311.1252.

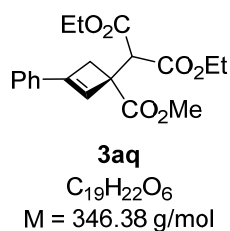

**Diethyl-2-(1-(methoxycarbonyl)-3-phenylcyclobut-2-en-1-yl)malonate (3aq):**

Prepared from methyl 3-phenylbicyclo[1.1.0]butane-1-carboxylate (**1a**, 37.6 mg, 0.2 mmol) and diethyl 2-bromomalonate (**2q**, 71.7 mg, 0.3 mmol) at rt for 3 h according to the **Condition A**. Purification by flash chromatography on silica gel using petroleum ether/EtOAc (20/1) afforded **3aq** as a colorless oil (43.6 mg, 63% yield).

**3aq**:  $R_f$  = 0.30 (petroleum ether/EtOAc = 10/1).  **$^1H$  NMR** (400 MHz,  $CDCl_3$ ):  $\delta$  7.37-7.34 (m, 4H), 7.32-7.29 (m, 1H), 6.37 (s, 1H), 4.21-4.18 (m, 4H), 4.10 (s, 1H), 3.72 (s, 3H), 3.30 (d,  $J$  = 13.6 Hz, 1H), 3.11 (d,  $J$  = 13.6 Hz, 1H), 1.25-1.20 (m, 6H) ppm.  **$^{13}C$  NMR** (100 MHz,  $CDCl_3$ ):  $\delta$  173.6, 167.9, 167.8, 148.1, 133.1, 128.7, 128.3, 126.7, 124.9, 61.43, 61.39, 55.9, 52.4, 49.8, 36.6, 14.00, 13.99 ppm. **HRMS** (ESI)  $m/z$ :  $[M+Na]^+$  calcd. for  $C_{19}H_{22}O_6Na$ : 369.1309; Found: 369.1302.

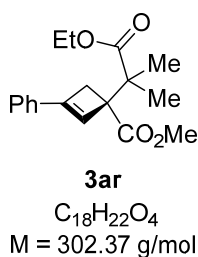

**Methyl-1-(1-ethoxy-2-methyl-1-oxopropan-2-yl)-3-phenylcyclobut-2-ene-1-**

**carboxylate (3ar)**: Prepared from methyl 3-phenylbicyclo[1.1.0]butane-1-carboxylate (**1a**, 37.6 mg, 0.2 mmol) and ethyl 2-bromo-2-methylpropanoate (**2r**, 58.5 mg, 0.3 mmol) at rt for 3 h according to the **Condition A**. Purification by flash chromatography on silica gel using petroleum ether/EtOAc (20/1) afforded **3ar** as a colorless oil (29.6 mg, 49% yield).

**3ar**:  $R_f$  = 0.35 (petroleum ether/EtOAc = 10/1).  $^1\text{H NMR}$  (400 MHz,  $\text{CDCl}_3$ ):  $\delta$  7.41-7.34 (m, 5H), 7.32-7.29 (m, 1H), 6.39 (s, 1H), 4.17 (q,  $J$  = 7.2 Hz, 2H), 3.66 (s, 3H), 3.05 (s, 2H), 1.28 (s, 3H), 1.27 (t,  $J$  = 7.2 Hz, 3H), 1.27 (s, 3H) ppm.  $^{13}\text{C NMR}$  (100 MHz,  $\text{CDCl}_3$ ):  $\delta$  176.7, 174.3, 147.6, 133.4, 128.42, 128.37, 127.7, 124.8, 60.5, 56.6, 51.9, 45.0, 34.9, 21.9, 21.5, 14.2 ppm. **HRMS** (ESI)  $m/z$ :  $[\text{M}+\text{Na}]^+$  calcd. for  $\text{C}_{18}\text{H}_{22}\text{O}_4\text{Na}$ : 325.1410; Found: 325.1406.

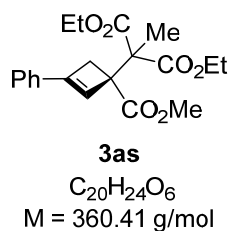

**Diethyl-2-(1-(methoxycarbonyl)-3-phenylcyclobut-2-en-1-yl)-2-methylmalonate**

**(3as)**: Prepared from methyl 3-phenylbicyclo[1.1.0]butane-1-carboxylate (**1a**, 37.6 mg, 0.2 mmol) and diethyl 2-bromo-2-methylmalonate (**2s**, 75.9 mg, 0.3 mmol) at rt for 3 h according to the **Condition A**. Purification by flash chromatography on silica gel using petroleum ether/EtOAc (20/1) afforded **3as** as a colorless oil (68.5 mg, 95% yield).

**3as**:  $R_f$  = 0.30 (petroleum ether/EtOAc = 10/1).  $^1\text{H NMR}$  (400 MHz,  $\text{CDCl}_3$ ):  $\delta$  7.39-7.30 (m, 5H), 6.38 (s, 1H), 4.25-4.16 (m, 4H), 3.69 (s, 3H), 3.14 (d,  $J$  = 13.6 Hz, 1H), 3.04 (d,  $J$  = 13.6 Hz, 1H), 1.64 (s, 3H), 1.28-1.22 (m, 6H) ppm.  $^{13}\text{C NMR}$  (100 MHz,  $\text{CDCl}_3$ ):  $\delta$  173.8, 171.2, 171.1, 147.9, 133.1, 128.5, 128.3, 127.5, 124.8, 61.35, 61.31, 57.4, 54.1, 52.1, 35.4, 17.8, 13.91, 13.88 ppm. **HRMS** (ESI)  $m/z$ :  $[\text{M}+\text{Na}]^+$  calcd. for  $\text{C}_{20}\text{H}_{24}\text{O}_6\text{Na}$ : 383.1465; Found: 383.1462.

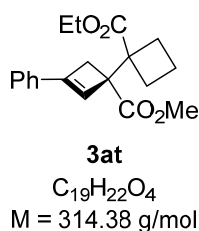

**1'-ethyl-1-methyl-3-phenyl-[1,1'-bi(cyclobutan)]-2-ene-1,1'-dicarboxylate (3at):**

Prepared from methyl 3-phenylbicyclo[1.1.0]butane-1-carboxylate (**1a**, 37.6 mg, 0.2 mmol) and ethyl-1-bromocyclobutane-1-carboxylate (**2t**, 62.1 mg, 0.3 mmol) at rt for 3 h according to the **Condition A**. Purification by flash chromatography on silica gel using petroleum ether/EtOAc (20/1) afforded **3at** as a colorless oil (56.6 mg, 90% yield).

**3at:**  $R_f$  = 0.35 (petroleum ether/EtOAc = 10/1). **<sup>1</sup>H NMR** (400 MHz, CDCl<sub>3</sub>): δ 7.42 (d,  $J$  = 7.2 Hz, 2H), 7.36 (t,  $J$  = 7.2 Hz, 2H), 7.32-7.29 (m, 1H), 6.42 (s, 1H), 4.19 (q,  $J$  = 4.8 Hz, 2H), 3.64 (s, 3H), 3.17 (d,  $J$  = 13.6 Hz, 1H), 2.82 (d,  $J$  = 13.2 Hz, 1H), 2.54-2.48 (m, 1H), 2.39-2.32 (m, 1H), 2.26-2.19 (m, 2H), 2.14-2.02 (m, 1H), 1.83-1.72 (m, 1H), 1.28 (t,  $J$  = 7.2 Hz, 3H) ppm. **<sup>13</sup>C NMR** (100 MHz, CDCl<sub>3</sub>): δ 176.3, 174.3, 149.2, 133.3, 128.5, 128.4, 126.0, 124.9, 60.5, 54.6, 51.8, 50.1, 35.1, 27.1, 26.6, 15.9, 14.1 ppm. **HRMS** (ESI)  $m/z$ : [M+Na]<sup>+</sup> calcd. for C<sub>19</sub>H<sub>22</sub>O<sub>4</sub>Na: 337.1410; Found: 337.1407.

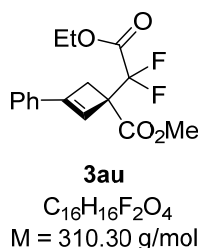**Methyl-1-(2-ethoxy-1,1-difluoro-2-oxoethyl)-3-phenylcyclobut-2-ene-1-**

**carboxylate (3au):** Prepared from methyl 3-phenylbicyclo[1.1.0]butane-1-carboxylate (**1a**, 37.6 mg, 0.2 mmol) and ethyl 2-bromo-2,2-difluoroacetate (**2u**, 60.9 mg, 0.3 mmol) at rt for 3 h according to the **Condition A**. Purification by flash chromatography on silica gel using petroleum ether/EtOAc (20/1) afforded **3au** as a colorless oil (38.5 mg, 62% yield).

**3au:**  $R_f$  = 0.40 (petroleum ether/EtOAc = 10/1). **<sup>1</sup>H NMR** (400 MHz, CDCl<sub>3</sub>): δ 7.43-7.34 (m, 5H), 6.31 (s, 1H), 4.38 (q,  $J$  = 7.2 Hz, 2H), 3.74 (s, 3H), 3.29 (d,  $J$  = 13.2 Hz, 1H), 3.20 (d,  $J$  = 13.6 Hz, 1H), 1.38 (t,  $J$  = 7.2 Hz, 3H) ppm. **<sup>13</sup>C NMR** (100 MHz, CDCl<sub>3</sub>): δ 170.3 (t,  $J$  = 4.5 Hz), 163.5 (t,  $J$  = 32.3 Hz), 150.9, 132.5, 129.2, 128.5,

125.1, 122.1 (t,  $J = 3.6$  Hz), 113.8 (t,  $J = 252.2$  Hz), 62.8, 54.4 (t,  $J = 26.2$  Hz), 52.6, 34.2 (t,  $J = 4.3$  Hz), 13.9 ppm.  **$^{19}\text{F}$  NMR** (376 MHz,  $\text{CDCl}_3$ )  $\delta$  -111.90 (d,  $J = 267.7$  Hz), -113.12 (d,  $J = 267.7$  Hz) ppm. **HRMS** (ESI)  $m/z$ :  $[\text{M}+\text{Na}]^+$  calcd. for  $\text{C}_{16}\text{H}_{16}\text{F}_2\text{O}_4\text{Na}$ : 333.0909; Found: 333,0908.

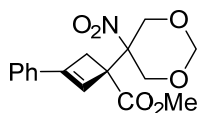

**3av**  
 $\text{C}_{16}\text{H}_{17}\text{NO}_6$   
 $M = 319.31$  g/mol

**Methyl-1-(5-nitro-1,3-dioxan-5-yl)-3-phenylcyclobut-2-ene-1-carboxylate (3av):**

Prepared from methyl 3-phenylbicyclo[1.1.0]butane-1-carboxylate (**1a**, 37.6 mg, 0.2 mmol) and 5-bromo-5-nitro-1,3-dioxane (**2v**, 63.6 mg, 0.3 mmol) at rt for 3 h according to the **Condition A**. Purification by flash chromatography on silica gel using petroleum ether/EtOAc (20/1) afforded **3av** as a colorless oil (43.4 mg, 68% yield).

**3av**:  $R_f = 0.30$  (petroleum ether/EtOAc = 10/1).  **$^1\text{H}$  NMR** (400 MHz,  $\text{CDCl}_3$ ):  $\delta$  7.38-7.36 (m, 5H), 6.25 (s, 1H), 5.02-4.96 (m, 2H), 4.89 (dd,  $J = 12.8$  and 2.0 Hz, 1H), 4.66 (d,  $J = 6.0$  Hz, 1H), 4.10 (d,  $J = 13.2$  Hz, 1H), 4.06 (d,  $J = 13.2$  Hz, 1H), 3.72 (s, 3H), 3.27 (d,  $J = 14.0$  Hz, 1H), 3.21 (d,  $J = 14.0$  Hz, 1H) ppm.  **$^{13}\text{C}$  NMR** (100 MHz,  $\text{CDCl}_3$ ):  $\delta$  170.3, 149.0, 131.9, 129.6, 128.6, 125.1, 123.5, 93.4, 87.9, 68.0, 67.9, 53.5, 52.9, 35.8 ppm. **HRMS** (ESI)  $m/z$ :  $[\text{M}+\text{Na}]^+$  calcd. for  $\text{C}_{16}\text{H}_{17}\text{NO}_6\text{Na}$ : 342.0948; Found: 342.0948.

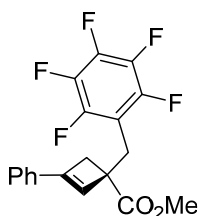

**3aw**  
 $\text{C}_{19}\text{H}_{13}\text{F}_5\text{O}_2$   
 $M = 368.30$  g/mol

**Methyl-1-((perfluorophenyl)methyl)-3-phenylcyclobut-2-ene-1-carboxylate**

**(3aw)**: Prepared from methyl 3-phenylbicyclo[1.1.0]butane-1-carboxylate (**1a**, 37.6 mg, 0.2 mmol) and 1-(bromomethyl)-2,3,4,5,6-pentafluorobenzene (**2w**, 78.3 mg, 0.3 mmol) at rt for 3 h according to the **Condition B**. Purification by flash chromatography on silica gel using petroleum ether/EtOAc (50/1) afforded **3aw** as a colorless oil (66.3 mg, 90% yield).

**3aw**:  $R_f$  = 0.60 (petroleum ether/EtOAc = 20/1).  $^1\text{H NMR}$  (400 MHz,  $\text{CDCl}_3$ ):  $\delta$  7.35-7.24 (m, 5H), 6.30 (s, 1H), 3.72 (s, 3H), 3.37-3.26 (m, 2H), 3.21 (d,  $J$  = 13.2 Hz, 1H), 2.73 (d,  $J$  = 13.2 Hz, 1H) ppm.  $^{13}\text{C NMR}$  (100 MHz,  $\text{CDCl}_3$ ):  $\delta$  174.1, 147.0, 146.7 (m), 144.3 (m), 138.7 (m), 133.1, 128.7, 128.4, 127.1, 124.9, 111.1(m), 52.3, 50.6, 37.5, 28.5 ppm.  $^{19}\text{F NMR}$  (376 MHz,  $\text{CDCl}_3$ ):  $\delta$  -142.07 (dd,  $J$  = 22.5, 7.8 Hz), -155.97 (t,  $J$  = 20.9 Hz), -162.46 (td,  $J$  = 22.6, 8.2 Hz). **HRMS** (ESI)  $m/z$ :  $[\text{M}+\text{Na}]^+$  calcd. for  $\text{C}_{19}\text{H}_{13}\text{F}_5\text{O}_2\text{Na}$ : 391.0728; Found: 391.0726.

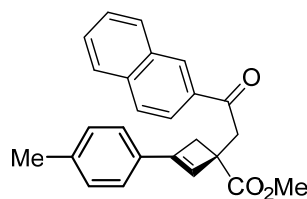

**3bj**  
 $\text{C}_{25}\text{H}_{22}\text{O}_3$   
 $M = 370.45 \text{ g/mol}$

**Methyl-1-(2-(naphthalen-2-yl)-2-oxoethyl)-3-(p-tolyl)cyclobut-2-ene-1-**

**carboxylate (3bj)**: Prepared from methyl methyl 3-(p-tolyl)bicyclo[1.1.0]butane-1-carboxylate (**1b**, 40.4 mg, 0.2 mmol) and 2-bromo-1-(naphthalen-2-yl)ethan-1-one (**2j**, 74.7 mg, 0.3 mmol) at rt for 3 h according to the **Condition A**. Purification by flash chromatography on silica gel using petroleum ether/EtOAc (20/1) afforded **3bj** as a white solid (54.1 mg, 73% yield).

**3bj**:  $R_f$  = 0.35 (petroleum ether/EtOAc = 10/1).  $^1\text{H NMR}$  (400 MHz,  $\text{CDCl}_3$ ):  $\delta$  8.49 (s, 1H), 8.04-8.02 (m, 1H), 7.95 (d,  $J$  = 8.0 Hz, 1H), 7.89-7.85 (m, 2H), 7.61-7.52 (m, 2H), 7.28 (d,  $J$  = 8.0 Hz, 2H), 7.15 (d,  $J$  = 8.0 Hz, 2H), 6.47 (s, 1H), 3.72 (d,  $J$  = 18.0 Hz, 1H), 3.72 (s, 3H), 3.40 (d,  $J$  = 13.2 Hz, 1H), 2.77 (d,  $J$  = 13.2 Hz, 1H), 2.34 (s, 3H)



ppm. **<sup>13</sup>C NMR** (100 MHz, CDCl<sub>3</sub>): δ 198.1, 175.2, 146.8, 138.4, 135.6, 133.9, 132.4, 130.9, 129.8, 129.5, 129.0, 128.44, 128.40, 127.7, 126.7, 124.8, 123.7, 52.2, 47.5, 45.3, 38.7, 21.4 ppm. **HRMS** (ESI) *m/z*: [M+Na]<sup>+</sup> calcd. for C<sub>25</sub>H<sub>23</sub>O<sub>3</sub>Na: 393.1461; Found: 393.1459.

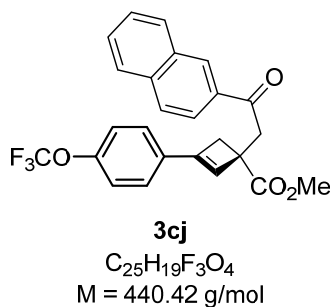

**Methyl-1-(2-(naphthalen-2-yl)-2-oxoethyl)-3-(4-(trifluoromethoxy)phenyl)cyclobut-2-ene-1-carboxylate (3cj):** Prepared from methyl 3-(4-(trifluoromethoxy)phenyl)bicyclo[1.1.0]butane-1-carboxylate (**1c**, 54.4 mg, 0.2 mmol) and 2-bromo-1-(naphthalen-2-yl)ethan-1-one (**2j**, 74.7 mg, 0.3 mmol) at rt for 3 h according to the **Condition A**. Purification by flash chromatography on silica gel using petroleum ether/EtOAc (20/1) afforded **3cj** as a white solid (49.3 mg, 56% yield).

**3cj:** *R<sub>f</sub>* = 0.35 (petroleum ether/EtOAc = 10/1). **<sup>1</sup>H NMR** (400 MHz, CDCl<sub>3</sub>): δ 8.49 (s, 1H), 8.03 (d, *J* = 8.4 Hz, 1H), 7.95 (d, *J* = 8.0 Hz, 1H), 7.88 (t, *J* = 8.8 Hz, 2H), 7.62-7.53 (m, 2H), 7.39 (d, *J* = 8.4 Hz, 2H), 7.19 (d, *J* = 8.4 Hz, 2H), 6.56 (s, 1H), 3.87 (d, *J* = 17.6 Hz, 1H), 3.73-3.69 (s, 4H), 3.40 (d, *J* = 13.2 Hz, 1H), 2.79 (d, *J* = 13.2 Hz, 1H) ppm. **<sup>13</sup>C NMR** (100 MHz, CDCl<sub>3</sub>): δ 197.9, 174.7, 149.1 (q, *J* = 1.7 Hz), 135.7, 133.9, 132.5, 132.4, 130.0, 129.8, 129.5, 128.53, 128.48, 127.8, 126.8, 126.4, 123.7, 120.9, 120.4 (q, *J* = 255.8 Hz), 52.3, 47.6, 45.0, 38.7 ppm. **<sup>19</sup>F NMR** (376 MHz, CDCl<sub>3</sub>) δ -57.82 (s) ppm. **HRMS** (ESI) *m/z*: [M+Na]<sup>+</sup> calcd. for C<sub>25</sub>H<sub>19</sub>F<sub>3</sub>O<sub>4</sub>Na: 463.1128; Found: 463.1119.

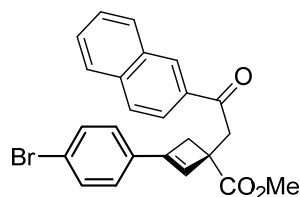**3dj**

$C_{24}H_{19}BrO_3$   
 $M = 435.32 \text{ g/mol}$

**Methyl-3-(4-bromophenyl)-1-(2-(naphthalen-2-yl)-2-oxoethyl)cyclobut-2-ene-1-carboxylate (3dj):** Prepared from methyl 3-(4-bromophenyl)bicyclo[1.1.0]butane-1-carboxylate (**1d**, 53.4 mg, 0.2 mmol) and 2-bromo-1-(naphthalen-2-yl)ethan-1-one (**2j**, 74.7 mg, 0.3 mmol) at rt for 3 h according to the **Condition A**. Purification by flash chromatography on silica gel using petroleum ether/EtOAc (20/1) afforded **3dj** as a white solid (69.7 mg, 80% yield).

**3dj:**  $R_f = 0.40$  (petroleum ether/EtOAc = 10/1).  $^1\text{H NMR}$  (400 MHz,  $\text{CDCl}_3$ ):  $\delta$  8.48 (s, 1H), 8.04-8.01 (m, 1H), 7.94 (d,  $J = 8.0 \text{ Hz}$ , 1H), 7.89-7.85 (m, 2H), 7.61-7.52 (m, 2H), 7.46 (d,  $J = 8.4 \text{ Hz}$ , 2H), 7.22 (d,  $J = 8.4 \text{ Hz}$ , 2H), 6.56 (s, 1H), 3.87 (d,  $J = 17.6 \text{ Hz}$ , 1H), 3.72 (s, 3H), 3.70 (d,  $J = 16.4 \text{ Hz}$ , 1H), 3.38 (d,  $J = 13.2 \text{ Hz}$ , 1H), 2.77 (d,  $J = 13.2 \text{ Hz}$ , 1H) ppm.  $^{13}\text{C NMR}$  (100 MHz,  $\text{CDCl}_3$ ):  $\delta$  197.9, 174.7, 145.7, 135.6, 133.7, 132.4, 132.4, 131.5, 129.8, 129.5, 128.5, 128.4, 127.7, 126.8, 126.4, 123.6, 122.4, 52.3, 47.6, 45.0, 38.6 ppm. **HRMS** (ESI)  $m/z$ :  $[M+\text{Na}]^+$  calcd. for  $C_{24}H_{19}BrO_3\text{Na}$ : 457.0410; Found: 457.0407.

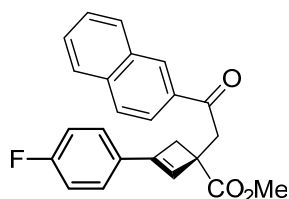**3ej**

$C_{24}H_{19}FO_3$   
 $M = 374.41 \text{ g/mol}$

**Methyl-3-(4-fluorophenyl)-1-(2-(naphthalen-2-yl)-2-oxoethyl)cyclobut-2-ene-1-carboxylate (3ej):** Prepared from methyl 3-(4-fluorophenyl)bicyclo[1.1.0]butane-1-carboxylate (**1e**, 41.2 mg, 0.2 mmol) and 2-bromo-1-(naphthalen-2-yl)ethan-1-one (**2j**,

74.7 mg, 0.3 mmol) at rt for 3 h according to the **Condition A**. Purification by flash chromatography on silica gel using petroleum ether/EtOAc (20/1) afforded **3ej** as a white solid (52.4 mg, 70% yield).

**3ej**:  $R_f$  = 0.35 (petroleum ether/EtOAc = 10/1).  $^1\text{H NMR}$  (400 MHz,  $\text{CDCl}_3$ ):  $\delta$  8.49 (s, 1H), 8.03 (dd,  $J$  = 8.8 and 1.6 Hz, 1H), 7.95 (d,  $J$  = 8.0 Hz, 1H), 7.88 (t,  $J$  = 8.8 Hz, 2H), 7.62-7.53 (m, 2H), 7.35 (dd,  $J$  = 8.8 and 5.2 Hz, 2H), 7.03 (t,  $J$  = 8.8 Hz, 2H), 6.49 (s, 1H), 3.87 (d,  $J$  = 17.6 Hz, 1H), 3.73 (s, 3H), 3.72 (d,  $J$  = 17.6 Hz, 1H), 3.39 (d,  $J$  = 13.2 Hz, 1H), 2.77 (d,  $J$  = 13.2 Hz, 1H) ppm.  $^{13}\text{C NMR}$  (100 MHz,  $\text{CDCl}_3$ ):  $\delta$  198.0, 175.0, 162.8 (d,  $J$  = 246.8 Hz), 145.8, 135.6, 133.8, 132.4, 130.0 (d,  $J$  = 3.3 Hz), 129.8, 129.5, 128.51, 128.45, 128.4 (d,  $J$  = 2.4 Hz), 127.8, 126.8 (d,  $J$  = 4.7 Hz), 126.7, 123.6, 115.4 (d,  $J$  = 21.7 Hz), 52.3, 47.4, 45.1, 38.7 ppm.  $^{19}\text{F NMR}$  (376 MHz,  $\text{CDCl}_3$ )  $\delta$  -112.27 (s) ppm. **HRMS** (ESI)  $m/z$ :  $[\text{M}+\text{Na}]^+$  calcd. for  $\text{C}_{24}\text{H}_{19}\text{FO}_3\text{Na}$ : 397.1210; Found: 397.1205.

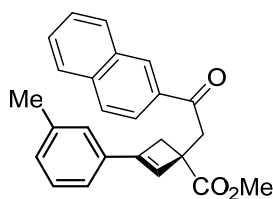

**3fj**  
 $\text{C}_{25}\text{H}_{22}\text{O}_3$   
 $M = 370.45 \text{ g/mol}$

**Methyl-1-(2-(naphthalen-2-yl)-2-oxoethyl)-3-(*m*-tolyl)cyclobut-2-ene-1-carboxylate (**3fj**):**

Prepared from methyl 3-(*m*-tolyl)bicyclo[1.1.0]butane-1-carboxylate (**1f**, 40.4 mg, 0.2 mmol) and 2-bromo-1-(naphthalen-2-yl)ethan-1-one (**2j**, 74.7 mg, 0.3 mmol) at rt for 3 h according to the **Condition A**. Purification by flash chromatography on silica gel using petroleum ether/EtOAc (20/1) afforded **3fj** as a white solid (51.9 mg, 70% yield).

**3fj**:  $R_f$  = 0.40 (petroleum ether/EtOAc = 10/1).  $^1\text{H NMR}$  (400 MHz,  $\text{CDCl}_3$ ):  $\delta$  8.48 (s, 1H), 8.03 (d,  $J$  = 8.8 Hz, 1H), 7.94 (d,  $J$  = 8.0 Hz, 1H), 7.87 (t,  $J$  = 8.4 Hz, 2H), 7.60-7.51 (m, 2H), 7.25-7.17 (m, 3H), 7.10 (d,  $J$  = 6.8 Hz, 1H), 6.52 (s, 1H), 3.85 (d,  $J$  = 17.6 Hz, 1H), 3.72 (s, 3H), 3.70 (d,  $J$  = 17.6 Hz, 1H), 3.40 (d,  $J$  = 13.2 Hz, 1H), 2.78 (d,  $J$  = 13.2 Hz, 1H), 2.34 (s, 3H) ppm.  $^{13}\text{C NMR}$  (100 MHz,  $\text{CDCl}_3$ ):  $\delta$  198.0, 175.1,

147.0, 138.0, 135.6, 133.9, 133.6, 132.5, 129.8, 129.5, 129.3, 128.7, 128.44, 128.41, 128.3, 127.7, 126.7, 125.5, 123.7, 122.0, 52.2, 47.6, 45.2, 38.7, 21.3 ppm. **HRMS** (ESI)  $m/z$ :  $[M+Na]^+$  calcd. for  $C_{25}H_{22}O_3Na$ : 393.1461; Found: 393.1458.

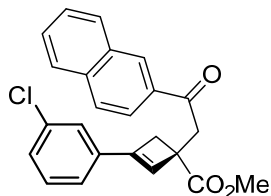**3gj**

$C_{24}H_{19}ClO_3$   
M = 390.86 g/mol

**Methyl-3-(3-chlorophenyl)-1-(2-(naphthalen-2-yl)-2-oxoethyl)cyclobut-2-ene-1-carboxylate (3gj)**: Prepared from methyl 3-(3-chlorophenyl)bicyclo[1.1.0]butane-1-carboxylate (**1g**, 44.6 mg, 0.2 mmol) and 2-bromo-1-(naphthalen-2-yl)ethan-1-one (**2j**, 74.7 mg, 0.3 mmol) at rt for 3 h according to the **Condition A**. Purification by flash chromatography on silica gel using petroleum ether/EtOAc (20/1) afforded **3gj** as a white solid (46.9 mg, 60% yield).

**3gj**:  $R_f$  = 0.40 (petroleum ether/EtOAc = 10/1).  **$^1H$  NMR** (400 MHz,  $CDCl_3$ ):  $\delta$  8.48 (s, 1H), 8.02 (dd,  $J$  = 8.4 and 1.6 Hz, 1H), 7.95 (d,  $J$  = 8.0 Hz, 1H), 7.87 (t,  $J$  = 8.4 Hz, 2H), 7.61-7.52 (m, 2H), 7.34 (s, 1H), 7.26-7.24 (m, 3H), 6.59 (s, 1H), 3.88 (d,  $J$  = 17.6 Hz, 1H), 3.73 (s, 3H), 3.70 (d,  $J$  = 17.6 Hz, 1H), 3.38 (d,  $J$  = 13.2 Hz, 1H), 2.77 (d,  $J$  = 13.2 Hz, 1H) ppm.  **$^{13}C$  NMR** (100 MHz,  $CDCl_3$ ):  $\delta$  197.8, 174.7, 145.5, 135.6, 135.4, 134.5, 133.8, 132.4, 130.7, 129.8, 129.7, 129.5, 128.5, 128.5, 128.4, 127.7, 126.8, 125.0, 123.6, 123.0, 52.3, 47.7, 45.0, 38.7 ppm. **HRMS** (ESI)  $m/z$ :  $[M+Na]^+$  calcd. for  $C_{24}H_{19}ClO_3Na$ : 413.0915; Found: 413.0909.

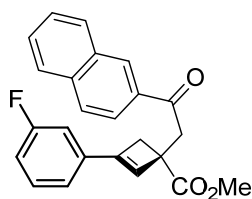**3hj**

$C_{24}H_{19}FO_3$   
M = 374.41 g/mol

**Methyl-3-(3-fluorophenyl)-1-(2-(naphthalen-2-yl)-2-oxoethyl)cyclobut-2-ene-1-**

**carboxylate (3hj):** Prepared from methyl 3-(3-fluorophenyl)bicyclo[1.1.0]butane-1-carboxylate (**1h**, 41.2 mg, 0.2 mmol) and 2-bromo-1-(naphthalen-2-yl)ethan-1-one (**2j**, 74.7 mg, 0.3 mmol) at rt for 3 h according to the **Condition A**. Purification by flash chromatography on silica gel using petroleum ether/EtOAc (20/1) afforded **3hj** as a white solid (52.4 mg, 70% yield).

**3hj:**  $R_f$  = 0.35 (petroleum ether/EtOAc = 10/1).  **$^1\text{H}$  NMR** (400 MHz,  $\text{CDCl}_3$ ):  $\delta$  8.49 (s, 1H), 8.03 (d,  $J$  = 8.4 Hz, 1H), 7.95 (d,  $J$  = 8.0 Hz, 1H), 7.87 (t,  $J$  = 8.8 Hz, 2H), 7.61-7.52 (m, 2H), 7.33-7.28 (m, 1H), 7.15 (d,  $J$  = 7.6 Hz, 1H), 7.05 (d,  $J$  = 9.6 Hz, 1H), 6.98 (t,  $J$  = 8.4 Hz, 1H), 6.58 (s, 1H), 3.88 (d,  $J$  = 17.6 Hz, 1H), 3.73 (s, 3H), 3.71 (d,  $J$  = 17.2 Hz, 1H), 3.38 (d,  $J$  = 13.2 Hz, 1H), 2.78 (d,  $J$  = 13.2 Hz, 1H) ppm.  **$^{13}\text{C}$  NMR** (100 MHz,  $\text{CDCl}_3$ ):  $\delta$  197.9, 174.7, 162.9 (d,  $J$  = 244.7 Hz), 145.7 (d,  $J$  = 2.5 Hz), 135.8 (d,  $J$  = 7.7 Hz), 135.6, 133.8, 132.4, 130.5, 130.0 (d,  $J$  = 8.2 Hz), 129.8, 129.5, 128.5, 128.4, 127.7, 123.6, 120.6 (d,  $J$  = 2.7 Hz), 120.6, 115.3 (d,  $J$  = 21.2 Hz), 111.6 (d,  $J$  = 21.5 Hz), 52.3, 47.6, 45.0, 38.7 ppm.  **$^{19}\text{F}$  NMR** (376 MHz,  $\text{CDCl}_3$ )  $\delta$  -113.12 (s) ppm. **HRMS** (ESI)  $m/z$ :  $[\text{M}+\text{Na}]^+$  calcd. for  $\text{C}_{24}\text{H}_{19}\text{FO}_3\text{Na}$ : 397.1210; Found: 397.1205.

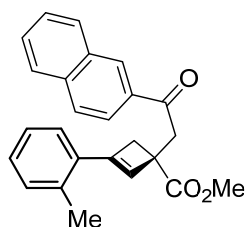

**3ij**  
 $\text{C}_{25}\text{H}_{22}\text{O}_3$   
 $M = 370.45 \text{ g/mol}$

**Methyl-1-(2-(naphthalen-2-yl)-2-oxoethyl)-3-(o-tolyl)cyclobut-2-ene-1-carboxylate (3ij):**

Prepared from methyl 3-(o-tolyl)bicyclo[1.1.0]butane-1-carboxylate (**1b**, 40.4 mg, 0.2 mmol) and 2-bromo-1-(naphthalen-2-yl)ethan-1-one (**2j**, 74.7 mg, 0.3 mmol) at rt for 3 h according to the **Condition A**. Purification by flash chromatography on silica gel using petroleum ether/EtOAc (20/1) afforded **3ij** as a colorless oil (37.0 mg, 50% yield).

**3ij**:  $R_f$  = 0.35 (petroleum ether/EtOAc = 10/1).  **$^1\text{H}$  NMR** (400 MHz,  $\text{CDCl}_3$ ):  $\delta$  8.50 (s, 1H), 8.04 (d,  $J$  = 8.4 Hz, 1H), 7.95 (d,  $J$  = 8.0 Hz, 1H), 7.88 (t,  $J$  = 9.2 Hz, 2H), 7.61-7.52 (m, 2H), 7.25-7.17 (m, 4H), 6.44 (s, 1H), 3.89 (d,  $J$  = 17.6 Hz, 1H), 3.74 (d,  $J$  = 17.6 Hz, 1H), 3.73 (s, 3H), 3.50 (d,  $J$  = 13.2 Hz, 1H), 2.87 (d,  $J$  = 13.2 Hz, 1H), 2.43 (s, 3H) ppm.  **$^{13}\text{C}$  NMR** (100 MHz,  $\text{CDCl}_3$ ):  $\delta$  198.1, 175.1, 146.7, 137.3, 135.6, 134.0, 132.5, 132.5, 132.3, 130.7, 129.8, 129.5, 128.5, 128.4, 128.3, 127.8, 126.8, 126.7, 125.8, 123.7, 52.2, 47.9, 45.4, 40.2, 21.7 ppm. **HRMS** (ESI)  $m/z$ :  $[\text{M}+\text{Na}]^+$  calcd. for  $\text{C}_{25}\text{H}_{22}\text{O}_3\text{Na}$ : 393.1461; Found: 393.1459.

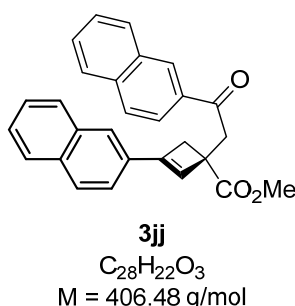

**Methyl-3-(naphthalen-2-yl)-1-(2-(naphthalen-2-yl)-2-oxoethyl)cyclobut-2-ene-1-carboxylate (3jj)**: Prepared from methyl 3-(naphthalen-2-yl)bicyclo[1.1.0]butane-1-carboxylate (**1j**, 47.6 mg, 0.2 mmol) and 2-bromo-1-(naphthalen-2-yl)ethan-1-one (**2j**, 74.7 mg, 0.3 mmol) at rt for 3 h according to the **Condition A**. Purification by flash chromatography on silica gel using petroleum ether/EtOAc (20/1) afforded **3jj** as a white solid (66.7 mg, 82% yield).

**3jj**:  $R_f$  = 0.40 (petroleum ether/EtOAc = 10/1).  **$^1\text{H}$  NMR** (400 MHz,  $\text{CDCl}_3$ ):  $\delta$  8.49 (s, 1H), 8.04 (d,  $J$  = 7.2 Hz, 1H), 7.94 (d,  $J$  = 7.6 Hz, 1H), 7.88-7.77 (m, 6H), 7.70 (s, 1H), 7.59-7.51 (m, 3H), 7.48-7.44 (m, 2H), 6.65 (s, 1H), 3.90 (d,  $J$  = 17.6 Hz, 1H), 3.74 (d,  $J$  = 17.2 Hz, 1H), 3.74 (s, 3H), 3.52 (d,  $J$  = 12.8 Hz, 1H), 2.89 (d,  $J$  = 12.8 Hz, 1H) ppm.  **$^{13}\text{C}$  NMR** (100 MHz,  $\text{CDCl}_3$ ):  $\delta$  198.0, 175.0, 146.9, 135.6, 133.9, 133.3, 133.2, 132.5, 131.1, 129.8, 129.6, 129.5, 128.44, 128.42, 128.2, 128.1, 127.7, 126.7, 126.4, 126.3, 124.1, 123.7, 122.6, 52.2, 47.7, 45.2, 38.8 ppm. **HRMS** (ESI)  $m/z$ :  $[\text{M}+\text{Na}]^+$  calcd. for  $\text{C}_{28}\text{H}_{22}\text{O}_3\text{Na}$ : 429.1461; Found: 429.1460.

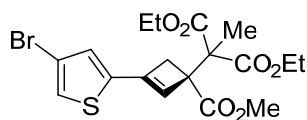**3ks**

$C_{18}H_{21}BrO_6S$   
 $M = 445.32 \text{ g/mol}$

**Diethyl 2-(3-(4-bromothiophen-2-yl)-1-(methoxycarbonyl)cyclobut-2-en-1-yl)-2-methylmalonate (3ks):** Prepared from methyl-3-(4-bromothiophen-2-yl)bicyclo[1.1.0]butane-1-carboxylate (**1k**, 54.6 mg, 0.2 mmol) and diethyl 2-bromo-2-methylmalonate (**2s**, 75.9 mg, 0.3 mmol) at rt for 3 h according to the **Condition A**. Purification by flash chromatography on silica gel using petroleum ether/EtOAc (20/1) afforded **3ks** as a yellow oil (63.3 mg, 71% yield).

**3ks:**  $R_f = 0.40$  (petroleum ether/EtOAc = 10/1).  $^1\text{H NMR}$  (400 MHz,  $\text{CDCl}_3$ ):  $\delta$  7.17 (s, 1H), 6.92 (s, 1H), 6.19 (s, 1H), 4.24-4.16 (m, 4H), 3.70 (s, 3H), 3.10 (d,  $J = 13.2 \text{ Hz}$ , 1H), 3.03 (d,  $J = 17.6 \text{ Hz}$ , 1H), 1.62 (s, 3H), 1.25 (q,  $J = 7.6 \text{ Hz}$ , 6H) ppm.  $^{13}\text{C NMR}$  (100 MHz,  $\text{CDCl}_3$ ):  $\delta$  173.2, 171.0, 170.9, 140.4, 138.1, 127.8, 127.5, 123.2, 110.2, 61.51, 61.46, 57.4, 55.2, 52.3, 36.6, 17.9, 14.0, 13.9 ppm. **HRMS** (ESI)  $m/z$ :  $[\text{M}+\text{Na}]^+$  calcd. for  $C_{18}H_{21}BrO_6\text{SNa}$ : 467.0134; Found: 467.0126.

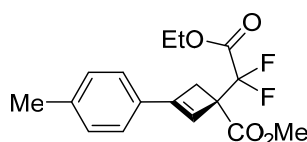**3bu**

$C_{17}H_{18}F_2O_4$   
 $M = 324.32 \text{ g/mol}$

**Methyl-1-(2-ethoxy-1,1-difluoro-2-oxoethyl)-3-(p-tolyl)cyclobut-2-ene-1-carboxylate**

**(3bu):** Prepared from methyl 3-(p-tolyl)bicyclo[1.1.0]butane-1-carboxylate (**1b**, 40.4 mg, 0.2 mmol) and ethyl 2-bromo-2,2-difluoroacetate (**2u**, 60.8 mg, 0.3 mmol) at rt for 3 h according to the **Condition A**. Purification by flash chromatography on silica gel using petroleum ether/EtOAc (20/1) afforded **3bu** as a yellow oil (33.7 mg, 52% yield).

**3bu:**  $R_f = 0.35$  (petroleum ether/EtOAc = 10/1).  $^1\text{H NMR}$  (400 MHz,  $\text{CDCl}_3$ ):  $\delta$  7.30 (d,  $J = 7.6 \text{ Hz}$ , 2H), 7.18 (d,  $J = 7.6 \text{ Hz}$ , 2H), 6.23 (s, 1H), 4.37 (q,  $J = 7.2 \text{ Hz}$ , 2H), 3.73

(s, 3H), 3.26 (d,  $J = 13.2$  Hz, 1H), 3.17 (d,  $J = 13.6$  Hz, 1H), 2.36 (s, 3H), 1.37 (t,  $J = 7.2$  Hz, 3H) ppm.  **$^{13}\text{C}$  NMR** (100 MHz,  $\text{CDCl}_3$ ):  $\delta$  170.4 (t,  $J = 4.5$  Hz), 163.5 (t,  $J = 32.4$  Hz), 150.9, 139.4, 129.9, 129.1, 125.1, 121.0 (t,  $J = 3.6$  Hz), 113.9 (t,  $J = 252.0$  Hz), 62.8, 54.4 (t,  $J = 26.1$  Hz), 52.6, 34.2 (t,  $J = 4.1$  Hz), 21.4, 13.9 ppm.  **$^{19}\text{F}$  NMR** (376 MHz,  $\text{CDCl}_3$ )  $\delta$  -111.95 (d,  $J = 267.7$  Hz), -113.15 (d,  $J = 267.7$  Hz) ppm. **HRMS** (ESI)  $m/z$ :  $[\text{M}+\text{Na}]^+$  calcd. for  $\text{C}_{17}\text{H}_{18}\text{F}_2\text{O}_4\text{Na}$ : 347.1065; Found: 347.1063.

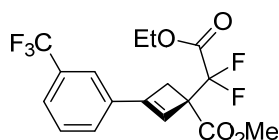

**3lu**  
 $\text{C}_{17}\text{H}_{15}\text{F}_5\text{O}_4$   
 $M = 378.30$  g/mol

**Methyl-1-(2-ethoxy-1,1-difluoro-2-oxoethyl)-3-(3-(trifluoromethyl)phenyl)cyclobut-2-ene-1-carboxylate (3lu)**: Prepared from methyl 3-(3-(trifluoromethyl)phenyl)bicyclo[1.1.0]butane-1-carboxylate (**1l**, 51.2 mg, 0.2 mmol) and ethyl 2-bromo-2,2-difluoroacetate (**2u**, 60.8 mg, 0.3 mmol) at rt for 3 h according to the **Condition A**. Purification by flash chromatography on silica gel using petroleum ether/EtOAc (20/1) afforded **3lu** as a yellow oil (41.6 mg, 55% yield).

**3lu**:  $R_f = 0.30$  (petroleum ether/EtOAc = 10/1).  **$^1\text{H}$  NMR** (400 MHz,  $\text{CDCl}_3$ ):  $\delta$  7.64 (s, 1H), 7.61-7.57 (m, 2H), 7.53-7.49 (m, 1H), 6.43 (s, 1H), 4.39 (q,  $J = 7.2$  Hz, 2H), 3.76 (s, 3H), 3.32 (d,  $J = 13.2$  Hz, 1H), 3.22 (d,  $J = 13.6$  Hz, 1H), 1.39 (t,  $J = 7.2$  Hz, 3H) ppm.  **$^{13}\text{C}$  NMR** (100 MHz,  $\text{CDCl}_3$ ):  $\delta$  169.9 (t,  $J = 4.4$  Hz), 163.3 (t,  $J = 32.1$  Hz), 149.5, 133.2, 131.1 (q,  $J = 32.3$  Hz), 129.1, 128.3, 125.7 (q,  $J = 3.7$  Hz), 124.4 (t,  $J = 3.4$  Hz), 123.9 (q,  $J = 271.0$  Hz), 122.0 (q,  $J = 3.6$  Hz), 113.7 (t,  $J = 252.8$  Hz), 63.0, 54.6 (t,  $J = 26.3$  Hz), 52.7, 34.2 (t,  $J = 4.2$  Hz), 13.9 ppm.  **$^{19}\text{F}$  NMR** (376 MHz,  $\text{CDCl}_3$ )  $\delta$  -62.90 (s), -111.90 (d,  $J = 268.8$  Hz), -113.17 (d,  $J = 268.8$  Hz) ppm. **HRMS** (ESI)  $m/z$ :  $[\text{M}+\text{Na}]^+$  calcd. for  $\text{C}_{17}\text{H}_{15}\text{F}_5\text{O}_4\text{Na}$ : 401.0783; Found: 401.0777.



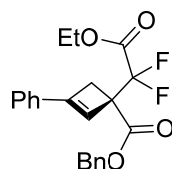**3mu**

$C_{22}H_{20}F_2O_4$   
 $M = 386.39 \text{ g/mol}$

**Benzyl-1-(2-ethoxy-1,1-difluoro-2-oxoethyl)-3-phenylcyclobut-2-ene-1-carboxylate**

**(3mu)**: Prepared from benzyl 3-phenylbicyclo[1.1.0]butane-1-carboxylate (**1m**, 52.9 mg, 0.2 mmol) and ethyl 2-bromo-2,2-difluoroacetate (**2u**, 60.8 mg, 0.3 mmol) at rt for 3 h according to the **Condition A**. Purification by flash chromatography on silica gel using petroleum ether/EtOAc (20/1) afforded **3mu** as a yellow oil (31.7 mg, 41% yield).

**3mu**:  $R_f = 0.30$  (petroleum ether/EtOAc = 10/1).  $^1\text{H NMR}$  (400 MHz,  $\text{CDCl}_3$ ):  $\delta$  7.41-7.32 (m, 10H), 6.32 (s, 1H), 5.18 (dd,  $J = 15.6$  and  $12.4 \text{ Hz}$ , 2H), 4.20 (q,  $J = 7.2 \text{ Hz}$ , 2H), 3.29 (d,  $J = 13.2 \text{ Hz}$ , 2H), 3.21 (d,  $J = 13.6 \text{ Hz}$ , 2H), 1.25 (t,  $J = 6.8 \text{ Hz}$ , 3H) ppm.  $^{13}\text{C NMR}$  (100 MHz,  $\text{CDCl}_3$ ):  $\delta$  169.5 (t,  $J = 4.5 \text{ Hz}$ ), 163.4 (t,  $J = 32.5 \text{ Hz}$ ), 151.0, 135.1, 132.6, 129.2, 128.6, 128.5, 128.4, 128.2, 125.2, 122.18 (t,  $J = 4.5 \text{ Hz}$ ), 113.8 (t,  $J = 269.0 \text{ Hz}$ ), 67.35, 62.80, 54.6 (t,  $J = 26.0 \text{ Hz}$ ), 34.2 (t,  $J = 4.1 \text{ Hz}$ ), 13.8 ppm.  $^{19}\text{F NMR}$  (376 MHz,  $\text{CDCl}_3$ )  $\delta$  -111.43 (d,  $J = 268.1 \text{ Hz}$ ), -112.68 (d,  $J = 268.1 \text{ Hz}$ ) ppm. **HRMS** (ESI)  $m/z$ :  $[\text{M}+\text{Na}]^+$  calcd. for  $\text{C}_{17}\text{H}_{20}\text{F}_2\text{O}_4\text{Na}$ : 409.1222; Found: 409.1220.

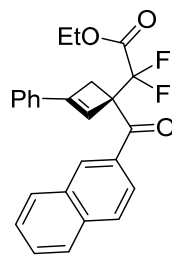**3nu**

$C_{25}H_{20}F_2O_3$   
 $M = 406.43 \text{ g/mol}$

**Ethyl-2-(1-(2-naphthoyl)-3-phenylcyclobut-2-en-1-yl)-2,2-difluoroacetate** (**3nu**):

Prepared from naphthalen-2-yl(3-phenylbicyclo[1.1.0]butan-1-yl)methanone (**1n**, 56.9

mg, 0.2 mmol) and ethyl 2-bromo-2,2-difluoroacetate (**2u**, 60.8 mg, 0.3 mmol) at rt for 3 h according to the **Condition A**. Purification by flash chromatography on silica gel using petroleum ether/EtOAc (20/1) afforded **3nu** as a yellow oil (28.4 mg, 51% yield).

**3nu**:  $R_f$  = 0.40 (petroleum ether/EtOAc = 10/1).  $^1\text{H NMR}$  (400 MHz,  $\text{CDCl}_3$ ):  $\delta$  8.54 (s, 1H), 7.99 (d,  $J$  = 8.8 Hz, 1H), 7.90-7.83 (m, 3H), 7.60-7.50 (m, 2H), 7.42-7.34 (m, 5H), 6.64 (s, 1H), 4.34 (q,  $J$  = 7.2 Hz, 2H), 3.62 (d,  $J$  = 13.6 Hz, 1H), 3.37 (d,  $J$  = 13.8 Hz, 1H), 1.32 (t,  $J$  = 7.2 Hz, 3H) ppm.  $^{13}\text{C NMR}$  (100 MHz,  $\text{CDCl}_3$ ):  $\delta$  197.6 (t,  $J$  = 1.8 Hz), 163.4 (t,  $J$  = 31.9 Hz), 150.7, 135.3, 133.7, 132.5, 132.2, 130.8, 129.7, 129.4, 128.7, 128.6, 128.2, 127.7, 126.8, 125.2, 124.6, 124.1 (t,  $J$  = 3.8 Hz), 114.8 (t,  $J$  = 253.6 Hz), 63.0, 60.2 (t,  $J$  = 24.5 Hz), 36.1 (t,  $J$  = 4.3 Hz), 13.9 ppm.  $^{19}\text{F NMR}$  (376 MHz,  $\text{CDCl}_3$ )  $\delta$  -109.34 (d,  $J$  = 256.4 Hz), -110.57 (d,  $J$  = 256.4 Hz) ppm. **HRMS** (ESI)  $m/z$ :  $[\text{M}+\text{Na}]^+$  calcd. for  $\text{C}_{25}\text{H}_{20}\text{F}_2\text{O}_3\text{Na}$ : 429.1273; Found: 429.1267.

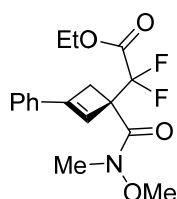

**3ou**  
 $\text{C}_{17}\text{H}_{19}\text{F}_2\text{NO}_4$   
 $M = 339.34$  g/mol

#### Ethyl-2,2-difluoro-2-(1-(methoxy(methyl)carbamoyl)-3-phenylcyclobut-2-en-1-yl)acetate

(**3ou**): Prepared from *N*-methoxy-*N*-methyl-3-phenylbicyclo[1.1.0]butane-1-carboxamide(**1o**, 43.4 mg, 0.2 mmol) and ethyl 2-bromo-2,2-difluoroacetate (**2u**, 60.8 mg, 0.3 mmol) at rt for 3 h according to the **Condition A**. Purification by flash chromatography on silica gel using petroleum ether/EtOAc (10/1) afforded **3ou** as a yellow oil (46.2 mg, 68% yield).

**3ou**:  $R_f$  = 0.30 (petroleum ether/EtOAc = 5/1).  $^1\text{H NMR}$  (400 MHz,  $\text{CDCl}_3$ ):  $\delta$  7.41-7.32 (m, 5H), 6.37 (s, 1H), 4.33 (q,  $J$  = 7.2 Hz, 2H), 3.68 (s, 3H), 3.42 (d,  $J$  = 13.6 Hz, 1H), 3.24 (d,  $J$  = 13.2 Hz, 1H), 3.22 (s, 3H), 1.34 (t,  $J$  = 7.2 Hz, 3H) ppm.  $^{13}\text{C NMR}$  (100 MHz,  $\text{CDCl}_3$ ):  $\delta$  168.8 (t,  $J$  = 2.5 Hz), 163.5 (t,  $J$  = 32.2 Hz), 149.4, 132.7, 129.0, 128.5, 125.0, 122.3 (t,  $J$  = 3.7 Hz), 114.6 (t,  $J$  = 253.6 Hz), 62.8, 61.6, 55.3 (t,  $J$  =

25.2 Hz), 35.6 (t,  $J = 5.0$  Hz), 33.2, 13.9 ppm.  **$^{19}\text{F}$  NMR** (376 MHz,  $\text{CDCl}_3$ )  $\delta$  -110.59 (d,  $J = 251.5$  Hz), -112.65 (d,  $J = 251.5$  Hz) ppm. **HRMS** (ESI)  $m/z$ :  $[\text{M}+\text{Na}]^+$  calcd. for  $\text{C}_{17}\text{H}_{19}\text{F}_2\text{NO}_4\text{Na}$ : 362.1174; Found: 362.1172.

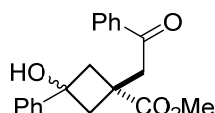**5aa** $\text{C}_{20}\text{H}_{20}\text{O}_4$  $M = 324.38$  g/mol

**Methyl 3-hydroxy-1-(2-oxo-2-phenylethyl)-3-phenylcyclobutane-1-carboxylate**

(**5aa**): yellow oil.  $R_f = 0.25$  (petroleum ether/EtOAc = 10/1).  **$^1\text{H}$  NMR** (400 MHz,  $\text{CDCl}_3$ ):  $\delta$  8.02 (d,  $J = 7.6$  Hz, 2H), 7.59 (t,  $J = 7.2$  Hz, 1H), 7.51-7.46 (m, 4H), 7.39 (t,  $J = 7.6$  Hz, 2H), 7.30 (d,  $J = 7.2$  Hz, 1H), 4.01 (s, 2H), 3.67 (s, 3H), 3.25 (d,  $J = 14.2$  Hz, 2H), 2.41 (d,  $J = 14.2$  Hz, 2H), 2.12 (broad s, 1H) ppm.  **$^{13}\text{C}$  NMR** (100 MHz,  $\text{CDCl}_3$ ):  $\delta$  198.1, 176.3, 146.2, 136.7, 133.2, 128.6, 128.5, 128.1, 127.4, 124.7, 73.9, 52.2, 46.6, 44.4, 37.9 ppm. **HRMS** (ESI)  $m/z$ :  $[\text{M}+\text{Na}]^+$  calcd. for  $\text{C}_{20}\text{H}_{20}\text{O}_4\text{Na}$ : 347.1249; Found: 347.1254.

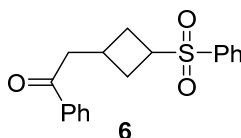**6** $\text{C}_{18}\text{H}_{18}\text{O}_3\text{S}$  $M = 314.40$  g/mol

**1-phenyl-2-(3-(phenylsulfonyl)cyclobutyl)ethan-1-one (6)**: Prepared from 1-(phenylsulfonyl)bicyclo[1.1.0]butane (**1t**, 38.9 mg, 0.2 mmol) and 2-bromo-1-phenylethan-1-one (**2a**, 59.7 mg, 0.3 mmol) at rt for 3 h according to the **Condition A**. Purification by flash chromatography on silica gel using petroleum ether/EtOAc (20/1) afforded **6** as a yellow oil (26.4 mg, 42% combined isolated yield).

For the major diastereomer:  $R_f = 0.45$  (petroleum ether/EtOAc = 10/1).  **$^1\text{H}$  NMR** (400 MHz,  $\text{CDCl}_3$ ):  $\delta$  7.93 (d,  $J = 7.6$  Hz, 2H), 7.86 (d,  $J = 7.6$  Hz, 2H), 7.64 (t,  $J = 7.2$  Hz, 1H), 7.59-7.53 (m, 3H), 7.47 (t,  $J = 7.2$  Hz, 2H), 3.80-3.72 (m, 1H), 3.22 (d,  $J = 6.8$  Hz, 2H), 2.88-2.80 (m, 1H), 2.52-2.45 (m, 2H), 2.34-2.27 (m, 2H) ppm.  **$^{13}\text{C}$  NMR** (150

MHz, CDCl<sub>3</sub>):  $\delta$  198.5, 138.0, 136.5, 133.6, 133.3, 129.2, 128.6, 128.1, 127.9, 54.1, 44.6, 28.8, 25.5 ppm. **HRMS** (ESI)  $m/z$ : [M+H]<sup>+</sup> calcd. for C<sub>18</sub>H<sub>19</sub>O<sub>3</sub>S: 315.1049; Found: 315.1035.

For the minor diastereomer: **R<sub>f</sub>** = 0.40 (petroleum ether/EtOAc = 10/1). **<sup>1</sup>H NMR** (400 MHz, CDCl<sub>3</sub>):  $\delta$  7.90 (d,  $J$  = 7.6 Hz, 4H), 7.64 (t,  $J$  = 7.2 Hz, 1H), 7.59-7.52 (m, 3H), 7.45 (t,  $J$  = 7.2 Hz, 2H), 3.88-3.80 (m, 1H), 3.15 (d,  $J$  = 7.2 Hz, 2H), 3.07-2.96 (m, 1H), 2.86-2.79 (m, 2H), 2.10-2.03 (m, 2H) ppm. **<sup>13</sup>C NMR** (150 MHz, CDCl<sub>3</sub>):  $\delta$  198.3, 137.8, 136.5, 133.6, 133.3, 129.2, 128.7, 128.3, 127.9, 54.8, 44.1, 28.0, 26.8 ppm. **HRMS** (ESI)  $m/z$ : [M+H]<sup>+</sup> calcd. for C<sub>18</sub>H<sub>19</sub>O<sub>3</sub>S: 315.1049; Found: 315.1032.

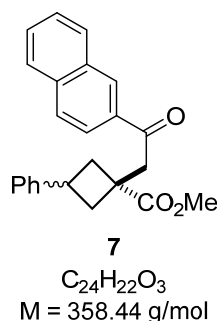

**Methyl 1-(2-(naphthalen-2-yl)-2-oxoethyl)-3-phenylcyclobutane-1-carboxylate (7)**: yellow oil. **R<sub>f</sub>** = 0.45 (petroleum ether/EtOAc = 10/1). **<sup>1</sup>H NMR** (400 MHz, CDCl<sub>3</sub>):  $\delta$  8.54 (s, 1H), 8.05 (d,  $J$  = 8.4 Hz, 1H), 7.99 (d,  $J$  = 7.6 Hz, 1H), 7.92-7.87 (m, 2H), 7.63-7.55 (m, 2H), 7.34-7.28 (m, 4H), 7.22-7.19 (m, 1H), 3.89 (s, 2H), 3.71 (s, 3H), 3.64-3.59 (m, 1H), 2.87 (dd,  $J$  = 11.6 and 10.4 Hz, 2H), 2.48 (dd,  $J$  = 10.8 and 10.0 Hz, 2H) ppm. **<sup>13</sup>C NMR** (100 MHz, CDCl<sub>3</sub>):  $\delta$  197.7, 176.0, 144.5, 135.7, 134.1, 132.5, 129.7, 129.5, 128.52, 128.48, 128.4, 127.8, 126.8, 126.6, 126.3, 123.7, 52.1, 44.9, 40.3, 37.3, 33.8 ppm. **HRMS** (ESI)  $m/z$ : [M+Na]<sup>+</sup> calcd. for C<sub>24</sub>H<sub>22</sub>O<sub>3</sub>Na: 381.1461; Found: 381.1463.

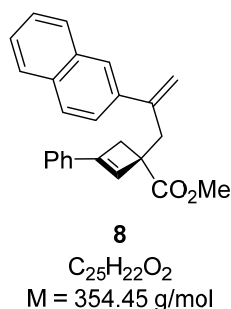

**Methyl-1-(2-(naphthalen-2-yl)allyl)-3-phenylcyclobut-2-ene-1-carboxylate (8):**

colorless oil.  $R_f$  = 0.45 (petroleum ether/EtOAc = 10/1).  $^1\text{H NMR}$  (400 MHz,  $\text{CDCl}_3$ ):  $\delta$  7.81-7.76 (m, 4H), 7.52 (d,  $J$  = 8.4 Hz, 1H), 7.46-7.44 (m, 2H), 7.31-7.24 (m, 5H), 6.16 (s, 1H), 5.42 (s, 1H), 5.21 (s, 1H), 3.47 (s, 3H), 3.30 (d,  $J$  = 14.4 Hz, 1H), 3.18 (d,  $J$  = 12.8 Hz, 1H), 3.16 (d,  $J$  = 14.4 Hz, 1H), 2.77 (d,  $J$  = 12.8 Hz, 1H) ppm.  $^{13}\text{C NMR}$  (100 MHz,  $\text{CDCl}_3$ ):  $\delta$  174.9, 145.80, 145.76, 139.0, 133.7, 133.2, 132.8, 129.1, 128.29, 128.26, 128.1, 127.7, 127.5, 126.1, 125.8, 125.1, 125.0, 124.8, 115.5, 51.7, 50.8, 42.2, 38.5 ppm. **HRMS** (ESI)  $m/z$ :  $[\text{M}+\text{Na}]^+$  calcd. for  $\text{C}_{25}\text{H}_{22}\text{O}_2\text{Na}$ : 377.1512; Found: 377.1511.

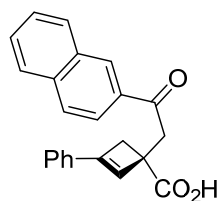

**9**  
 $\text{C}_{23}\text{H}_{18}\text{O}_3$   
 $M = 342.39 \text{ g/mol}$

**1-(2-oxopropyl)-3-phenylcyclobut-2-ene-1-carboxylic acid (9):** white solid.  $R_f$  =

0.3 (petroleum ether/EtOAc = 1/2).  $^1\text{H NMR}$  (400 MHz,  $\text{CD}_3\text{COCD}_3$ ):  $\delta$  8.71 (s, 1H), 8.12-8.06 (m, 2H), 8.01-7.97 (m, 2H), 7.67-7.59 (m, 2H), 7.46 (d,  $J$  = 7.6 Hz, 2H), 7.38 (t,  $J$  = 7.6 Hz, 2H), 7.32 (d,  $J$  = 7.2 Hz, 1H), 6.64 (s, 1H), 3.90 (d,  $J$  = 17.6 Hz, 1H), 3.81 (d,  $J$  = 18.0 Hz, 1H), 3.40 (d,  $J$  = 13.2 Hz, 1H), 2.84 (d,  $J$  = 13.2 Hz, 1H) ppm.  $^{13}\text{C NMR}$  (100 MHz,  $\text{CD}_3\text{COCD}_3$ ):  $\delta$  197.8, 175.0, 146.8, 135.7, 134.4, 134.2, 132.8, 129.9, 129.8, 129.6, 128.5, 128.4, 128.3, 127.7, 126.8, 124.8, 123.6, 47.5, 44.7, 38.5 ppm. **HRMS** (ESI)  $m/z$ :  $[\text{M}+\text{Na}]^+$  calcd. for  $\text{C}_{23}\text{H}_{18}\text{O}_3\text{Na}$ : 365.1148; Found: 365.1145.

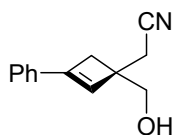

**10**  
 $\text{C}_{13}\text{H}_{13}\text{NO}$   
 $M = 199.25 \text{ g/mol}$

**2-(1-(hydroxymethyl)-3-phenylcyclobut-2-en-1-yl)acetonitrile (10):** colorless oil.  $R_f = 0.3$  (petroleum ether/EtOAc = 2/1).  $^1\text{H NMR}$  (400 MHz,  $\text{CDCl}_3$ ):  $\delta$  7.38-7.29 (m, 5H), 6.38 (s, 1H), 3.80 (dd,  $J = 13.6$  and  $10.8$  Hz, 2H), 2.76-2.64 (m, 4H), 1.85 (broad s, 1H) ppm.  $^{13}\text{C NMR}$  (100 MHz,  $\text{CDCl}_3$ ):  $\delta$  146.8, 133.4, 128.7, 128.4, 128.1, 124.8, 118.2, 67.2, 44.9, 36.7, 23.2 ppm. **HRMS** (ESI)  $m/z$ :  $[\text{M}+\text{Na}]^+$  calcd. for  $\text{C}_{13}\text{H}_{13}\text{NONa}$ : 222.0889; Found: 222.0888.

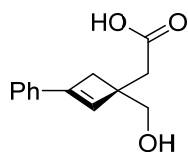

**11**  
 $\text{C}_{13}\text{H}_{14}\text{O}_3$   
 $M = 218.25$  g/mol

**2-(1-(hydroxymethyl)-3-phenylcyclobut-2-en-1-yl)acetic acid (11):** white solid.  $R_f = 0.3$  (petroleum ether/EtOAc = 1/3).  $^1\text{H NMR}$  (400 MHz,  $\text{CD}_3\text{COCD}_3$ ):  $\delta$  7.40 (d,  $J = 7.2$  Hz, 2H), 7.35 (t,  $J = 7.2$  Hz, 2H), 7.27 (t,  $J = 7.2$  Hz, 1H), 6.54 (s, 1H), 3.73 (s, 2H), 2.93 (broad s, 2H), 2.76 (d,  $J = 15.2$  Hz, 1H), 2.66 (d,  $J = 3.6$  Hz, 2H), 2.63 (d,  $J = 15.2$  Hz, 1H) ppm.  $^{13}\text{C NMR}$  (100 MHz,  $\text{CD}_3\text{COCD}_3$ ):  $\delta$  172.8, 144.9, 134.8, 131.8, 128.4, 127.9, 124.6, 67.2, 45.4, 38.5, 37.1 ppm. **HRMS** (ESI)  $m/z$ :  $[\text{M}+\text{Na}]^+$  calcd. for  $\text{C}_{13}\text{H}_{14}\text{O}_3\text{Na}$ : 241.0835; Found: 241.0831.

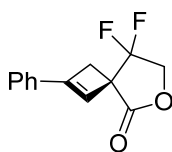

**12**  
 $\text{C}_{13}\text{H}_{10}\text{F}_2\text{O}_2$   
 $M = 236.22$  g/mol

**8,8-difluoro-2-phenyl-6-oxaspiro[3.4]oct-1-en-5-one (12):** colorless oil.  $R_f = 0.5$  (petroleum ether/EtOAc = 10/1).  $^1\text{H NMR}$  (400 MHz,  $\text{CDCl}_3$ ):  $\delta$  7.46-7.36 (m, 5H), 6.20 (s, 1H), 4.57-4.43 (m, 2H), 3.26 (d,  $J = 12.8$  Hz, 1H), 3.06 (d,  $J = 12.8$  Hz, 1H) ppm.  $^{13}\text{C NMR}$  (100 MHz,  $\text{CDCl}_3$ ):  $\delta$  173.1 (dd,  $J = 13.3$  and  $4.8$  Hz), 151.6, 132.1, 129.6, 128.6, 125.2, 123.0 (dd,  $J = 252.2$  and  $247.1$  Hz), 119.1 (dd,  $J = 7.1$  and  $1.6$  Hz), 70.5 (t,  $J = 32.4$  Hz), 50.2 (t,  $J = 25.8$  Hz), 33.7 (dd,  $J = 6.7$  and  $3.0$  Hz) ppm.  $^{19}\text{F}$

**NMR** (376 MHz, CDCl<sub>3</sub>)  $\delta$  -107.69 (d,  $J$  = 238.8 Hz), -111.71 (d,  $J$  = 238.8 Hz) ppm.

**HRMS** (ESI)  $m/z$ : [M+Na]<sup>+</sup> calcd. for C<sub>13</sub>H<sub>10</sub>F<sub>2</sub>O<sub>2</sub>Na: 259.0541; Found: 259.0540.

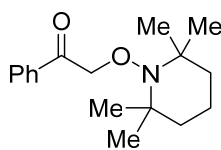

**13**

C<sub>17</sub>H<sub>25</sub>NO<sub>2</sub>  
M = 275.39 g/mol

**1-phenyl-2-((2,2,6,6-tetramethylpiperidin-1-yl)oxy)ethan-1-one (13)**: colorless oil.

**R<sub>f</sub>** = 0.6 (petroleum ether/EtOAc = 10/1). **<sup>1</sup>H NMR** (400 MHz, CDCl<sub>3</sub>):  $\delta$  6.92 (d,  $J$  = 7.6 Hz, 2H), 6.54 (t,  $J$  = 7.2 Hz, 1H), 6.43 (t,  $J$  = 7.6 Hz, 2H), 4.09 (s, 2H), 0.58-0.53 (m, 1H), 0.47-0.43 (m, 4H), 0.33-0.30 (m, 1H), 0.16 (s, 12H) ppm. **<sup>13</sup>C NMR** (100 MHz, CDCl<sub>3</sub>):  $\delta$  195.7, 135.4, 133.2, 128.5, 127.9, 81.3, 60.1, 39.7, 32.8, 20.2, 17.0 ppm. **HRMS** (ESI)  $m/z$ : [M+Na]<sup>+</sup> calcd. for C<sub>17</sub>H<sub>25</sub>NO<sub>2</sub>Na: 298.1778; Found: 298.1772.

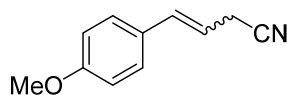

**14**

C<sub>11</sub>H<sub>11</sub>NO  
M = 173.22 g/mol

**4-(4-methoxyphenyl)but-3-enenitrile (14)**: colorless oil.

**(Z)-14**: **R<sub>f</sub>** = 0.60 (petroleum ether/EtOAc = 10/1). **<sup>1</sup>H NMR** (400 MHz, CDCl<sub>3</sub>):  $\delta$  7.16 (d,  $J$  = 8.4 Hz, 2H), 6.91 (d,  $J$  = 8.8 Hz, 2H), 6.67 (d,  $J$  = 11.2 Hz, 1H), 5.63-5.57 (m, 1H), 3.82 (s, 3H), 3.29 (d,  $J$  = 7.2 Hz, 2H) ppm. **<sup>13</sup>C NMR** (100 MHz, CDCl<sub>3</sub>):  $\delta$  159.1, 134.1, 129.8, 127.6, 118.2, 117.3, 114.0, 55.3, 17.1 ppm. **HRMS** (ESI)  $m/z$ : [M+H]<sup>+</sup> calcd. for C<sub>11</sub>H<sub>12</sub>NO: 174.0913; Found: 174.0911.

**(E)-14**: **R<sub>f</sub>** = 0.55 (petroleum ether/EtOAc = 10/1). **<sup>1</sup>H NMR** (400 MHz, CDCl<sub>3</sub>):  $\delta$  7.30 (d,  $J$  = 8.4 Hz, 2H), 6.87 (d,  $J$  = 8.4 Hz, 2H), 6.67 (d,  $J$  = 16.0 Hz, 1H), 5.94-5.87 (m, 1H), 3.81 (s, 3H), 3.26 (d,  $J$  = 5.6 Hz, 2H) ppm. **<sup>13</sup>C NMR** (100 MHz, CDCl<sub>3</sub>):  $\delta$  159.6,

134.0, 128.4, 127.7, 117.5, 114.3, 114.1, 55.3, 20.7 ppm. **HRMS** (ESI)  $m/z$ :  $[M+H]^+$  calcd. for  $C_{11}H_{12}NO$ : 174.0913; Found: 174.0910.

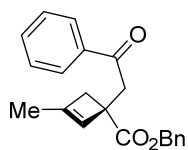**3pa** $C_{21}H_{20}O_3$ 

M = 320.39 g/mol

**Benzyl-3-methyl-1-(2-oxo-2-phenylethyl)cyclobut-2-ene-1-carboxylate (3pa):**

Prepared from benzyl-3-methylbicyclo[1.1.0]butane-1-carboxylate (**1p**, 40.5 mg, 0.2 mmol) and 2-bromo-1-phenylethan-1-one (**2a**, 59.7 mg, 0.3 mmol) at rt for 10 h according to the **Condition A**. Purification by flash chromatography on silica gel using petroleum ether/EtOAc (20/1) afforded **3pa** as a colorless oil (1.9 mg, 3% yield). The desired **3pa** containing unknown by-products that cannot be separated using flash chromatography on silica gel.

**3pa**:  $R_f$  = 0.40 (petroleum ether/EtOAc = 10/1).  **$^1H$  NMR** (600 MHz,  $CDCl_3$ ):  $\delta$  7.94 (d,  $J$  = 7.8 Hz, 2H), 7.60-7.55 (m, 1H), 7.51-7.44 (m, 2H), 7.37-7.27 (m, 5H), 5.96 (s, 1H), 5.13 (d,  $J$  = 6.0 Hz, 2H), 3.62 (d,  $J$  = 18.0 Hz, 1H), 3.51 (d,  $J$  = 17.4 Hz, 1H), 3.01 (d,  $J$  = 13.2 Hz, 1H), 2.35 (d,  $J$  = 13.2 Hz, 1H), 1.77 (s, 3H) ppm.  **$^{13}C$  NMR** (150 MHz,  $CDCl_3$ ):  $\delta$  198.3, 174.8, 147.9, 136.6, 136.3, 133.1, 131.0, 128.5, 128.4, 128.0, 127.8, 127.7, 66.3, 48.0, 45.0, 42.4, 16.8 ppm. **HRMS** (ESI)  $m/z$ :  $[M+H]^+$  calcd. for  $C_{21}H_{21}O_3$ : 321.1485; Found: 321.1483.

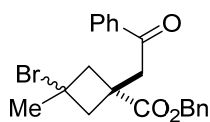**16** $C_{21}H_{21}BrO_3$ 

M = 401.30 g/mol

**Benzyl 3-bromo-3-methyl-1-(2-oxo-2-phenylethyl)cyclobutane-1-carboxylate (16):**

Prepared from benzyl 3-methylbicyclo[1.1.0]butane-1-carboxylate (**1p**, 40.5 mg, 0.2 mmol) and 2-bromo-1-phenylethan-1-one (**2a**, 59.7 mg, 0.3 mmol) at rt for 10 h



according to the **Condition A**. Purification by flash chromatography on silica gel using petroleum ether/EtOAc (10/1) afforded **16** as a colorless oil (48.2 mg, 60% combined isolated yield).

For the major diastereomer:  $R_f = 0.40$  (petroleum ether/EtOAc = 10/1).  $^1\text{H NMR}$  (400 MHz,  $\text{CDCl}_3$ ):  $\delta$  7.95 (d,  $J = 7.6$  Hz, 2H), 7.57 (d,  $J = 6.8$  Hz, 1H), 7.47 (t,  $J = 7.2$  Hz, 2H), 7.32-7.21 (m, 5H), 5.12 (s, 2H), 3.93 (s, 2H), 3.15 (d,  $J = 14.4$  Hz, 2H), 2.82 (d,  $J = 14.4$  Hz, 2H), 1.96 (s, 3H) ppm.  $^{13}\text{C NMR}$  (150 MHz,  $\text{CDCl}_3$ ):  $\delta$  197.4, 175.0, 136.3, 135.7, 133.4, 128.6, 128.5, 128.1, 128.02, 127.99, 66.9, 56.7, 49.2, 47.5, 38.8, 34.5 ppm. **HRMS** (ESI)  $m/z$ :  $[\text{M}+\text{H}]^+$  calcd. for  $\text{C}_{21}\text{H}_{22}\text{BrO}_3$ : 401.0747; Found: 401.0729.

For the minor diastereomer:  $R_f = 0.30$  (petroleum ether/EtOAc = 10/1).  $^1\text{H NMR}$  (400 MHz,  $\text{CDCl}_3$ ):  $\delta$  7.90 (d,  $J = 7.6$  Hz, 2H), 7.58 (t,  $J = 7.2$  Hz, 1H), 7.46 (t,  $J = 7.2$  Hz, 2H), 7.37-7.29 (m, 5H), 5.18 (s, 2H), 3.55 (s, 2H), 3.54 (d,  $J = 14.4$  Hz, 2H), 2.55 (d,  $J = 14.4$  Hz, 2H), 1.99 (s, 3H) ppm.  $^{13}\text{C NMR}$  (150 MHz,  $\text{CDCl}_3$ ):  $\delta$  196.9, 174.6, 136.2, 135.8, 133.5, 128.6, 128.4, 128.03, 127.96, 127.9, 67.0, 54.3, 49.2, 46.6, 39.0, 35.9 ppm. **HRMS** (ESI)  $m/z$ :  $[\text{M}+\text{H}]^+$  calcd. for  $\text{C}_{21}\text{H}_{22}\text{BrO}_3$ : 401.0747; Found: 401.0727.

## 11 Crystal Structure of **3am**

Note: The thermal ellipsoids are 50% probability level. The crystals are grown by slow solvent ( $\text{CH}_2\text{Cl}_2/n$ -Hexane) evaporation at room temperature. CCDC number of **3am** is 2287475.

Datablock exp\_3129 - ellipsoid plot

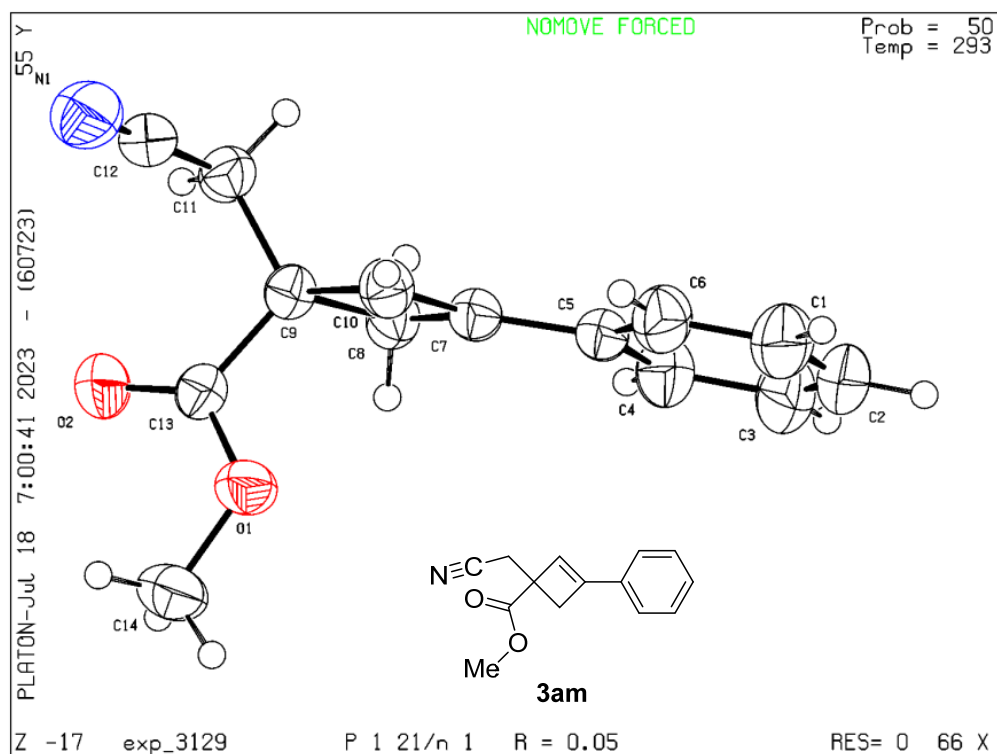

## Datablock: exp\_3129

Bond precision: C-C = 0.0028 Å Wavelength=1.54184

Cell: a=10.84837(19) b=8.49086(12) c=14.3960(3)  
alpha=90 beta=111.998(2) gamma=90

Temperature: 293 K

|                        | Calculated   | Reported     |
|------------------------|--------------|--------------|
| Volume                 | 1229.50(4)   | 1229.50(4)   |
| Space group            | P 21/n       | P 1 21/n 1   |
| Hall group             | -P 2yn       | -P 2yn       |
| Moiety formula         | C14 H13 N O2 | C14 H13 N O2 |
| Sum formula            | C14 H13 N O2 | C14 H13 N O2 |
| Mr                     | 227.25       | 227.25       |
| Dx, g cm <sup>-3</sup> | 1.228        | 1.228        |
| Z                      | 4            | 4            |
| Mu (mm <sup>-1</sup> ) | 0.666        | 0.666        |
| F000                   | 480.0        | 480.0        |
| F000'                  | 481.46       |              |
| h, k, lmax             | 12, 10, 17   | 12, 10, 17   |
| Nref                   | 2160         | 2160         |
| Tmin, Tmax             | 0.852, 0.936 | 0.640, 1.000 |
| Tmin'                  | 0.819        |              |

Correction method= # Reported T Limits: Tmin=0.640 Tmax=1.000  
AbsCorr = MULTI-SCAN

Data completeness= 1.000 Theta(max)= 66.595

R(reflections)= 0.0481( 2012) wR2(reflections)=  
0.1439( 2160)

S = 1.079 Npar= 155

## 12 References

- [1] (a) Dhake, K.; Woelk, K. J.; Becica, J.; Un, A.; Jenny, S. E.; Leitch, D. C.; *Angew. Chem. Int. Ed.* **2022**, *61*, e202204719. (b) Livingstone, K.; Siebold, K.; Meyer, S.; Heras, V. M.; Daniliuc, C. G.; Gilmour, R. *ACS Catal.* **2022**, *12*, 14507. (c) Guo, R.; Chang, Y.-C.; Herter, L.; Salome, C.; Braley, S. E.; Fessard, T. C.; Brown, M. K. *J. Am. Chem. Soc.* **2022**, *144*, 7988; d) Sharland, J. C.; Davies, H. M. L. *Org. Lett.* **2023**, *25*, 5214.

## 13 NMR Spectra

### $^1\text{H}$ and $^{13}\text{C}$ NMR Spectra for Compound 3aa:

$^1\text{H}$  NMR (400 MHz,  $\text{CDCl}_3$ )

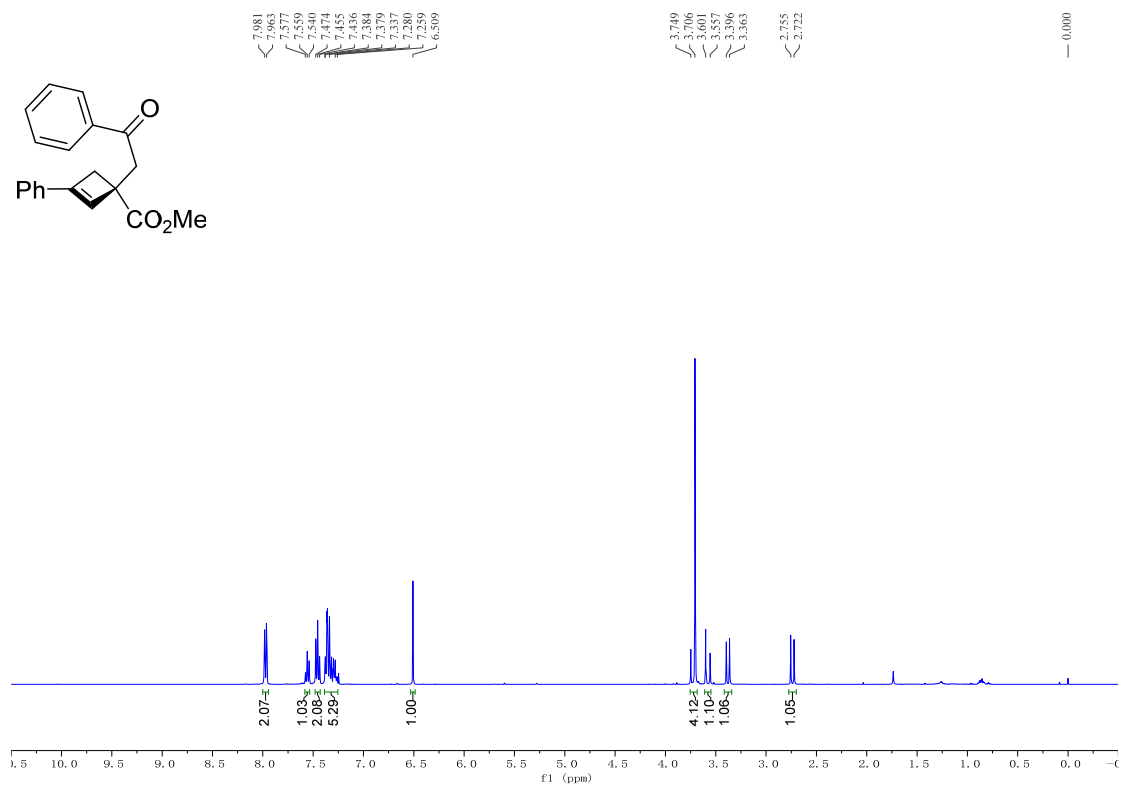

$^{13}\text{C}$  NMR (100 MHz,  $\text{CDCl}_3$ )

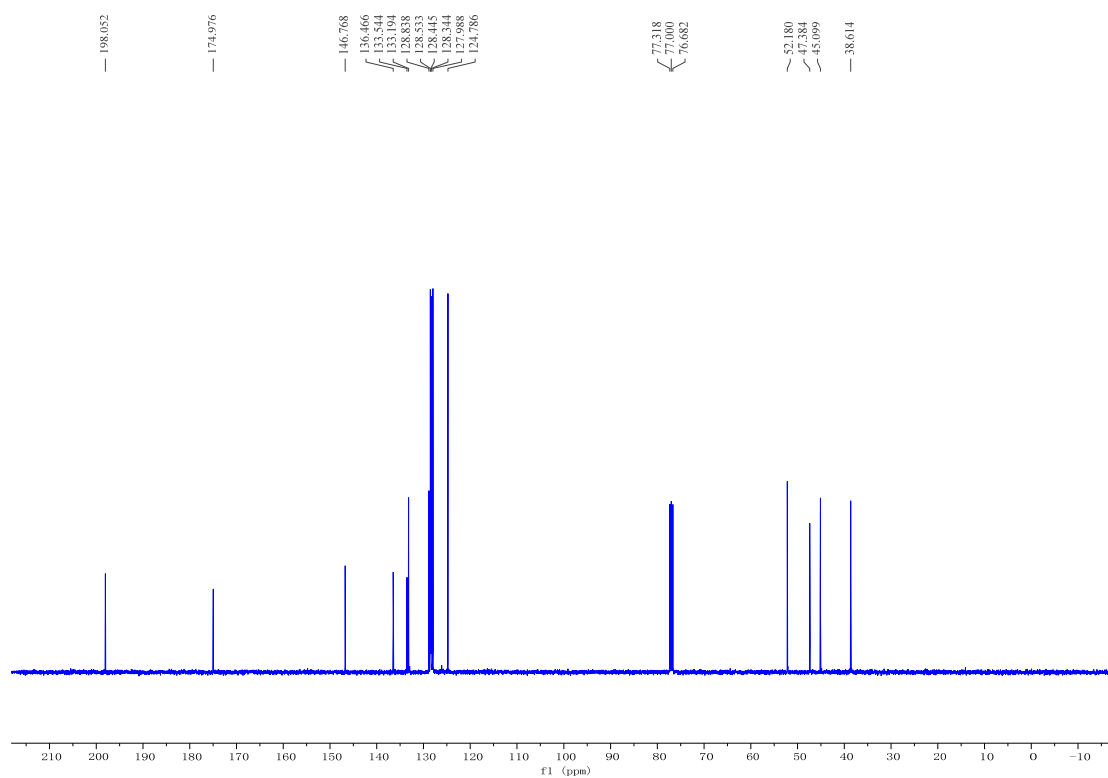

**$^1\text{H}$  and  $^{13}\text{C}$  NMR Spectra for Compound 3ab:** $^1\text{H}$  NMR (400 MHz,  $\text{CDCl}_3$ )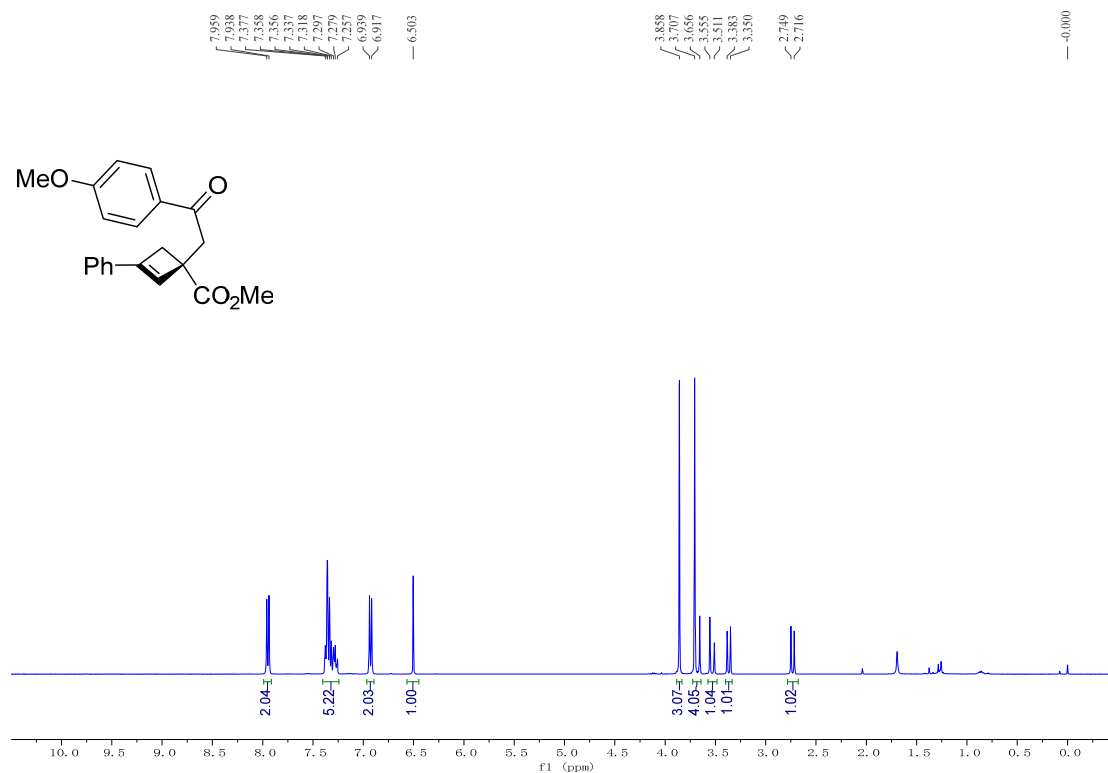 $^{13}\text{C}$  NMR (100 MHz,  $\text{CDCl}_3$ )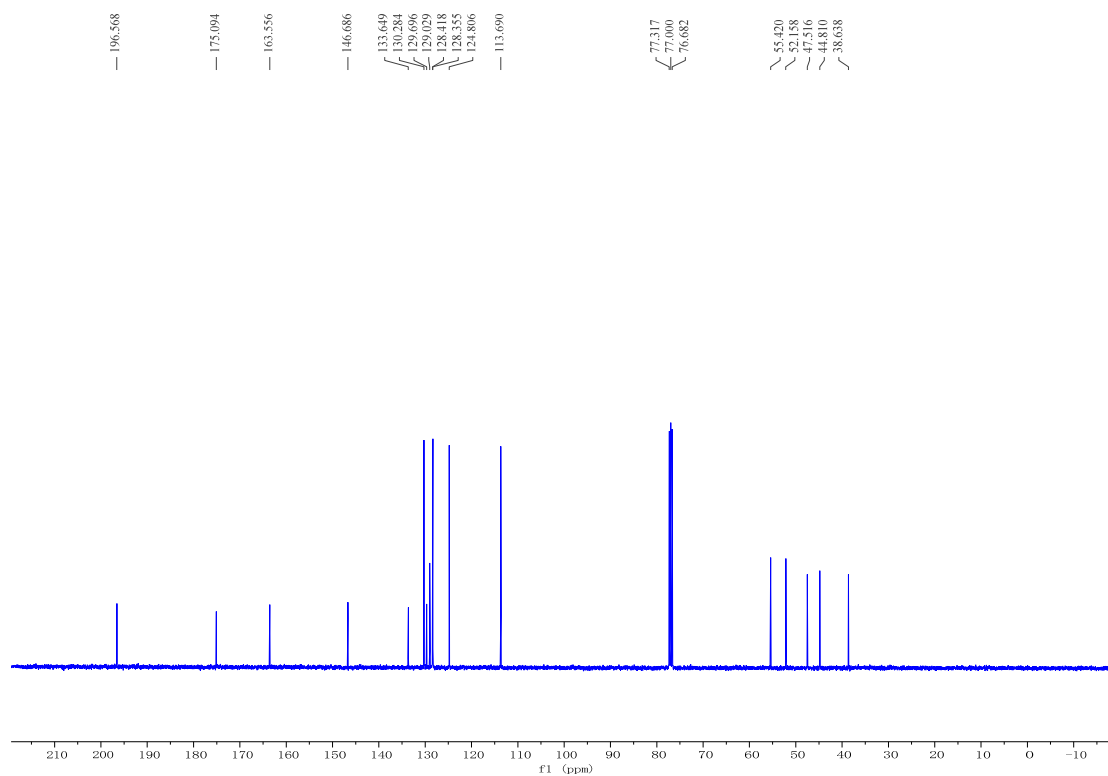

**$^1\text{H}$  and  $^{13}\text{C}$  NMR Spectra for Compound 3ac:** $^1\text{H}$  NMR (400 MHz,  $\text{CDCl}_3$ )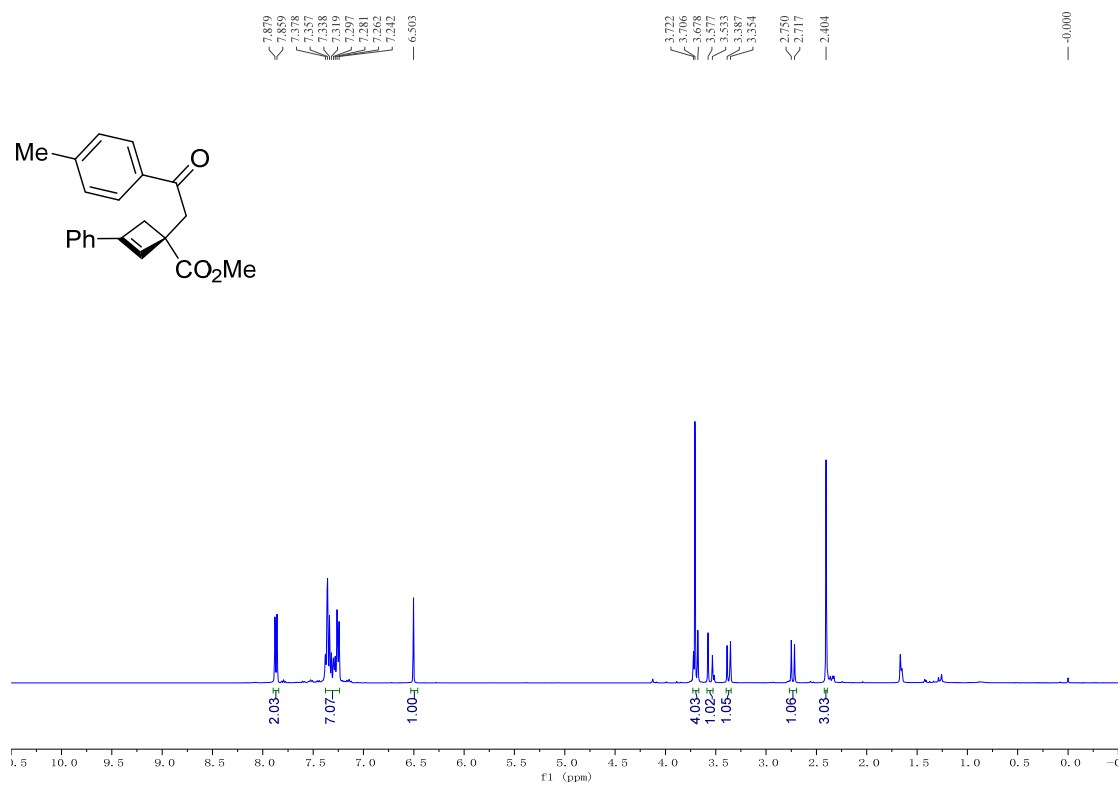 $^{13}\text{C}$  NMR (100 MHz,  $\text{CDCl}_3$ )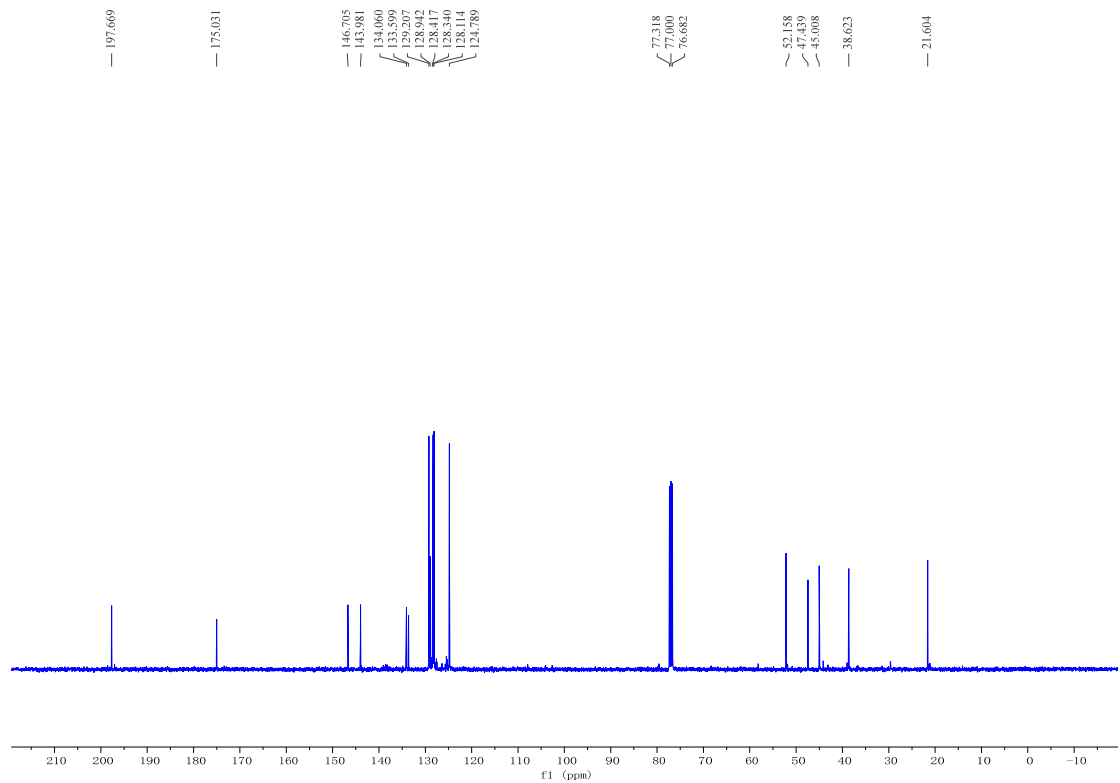

**$^1\text{H}$  and  $^{13}\text{C}$  NMR Spectra for Compound 3ad:** **$^1\text{H}$  NMR (400 MHz,  $\text{CDCl}_3$ )**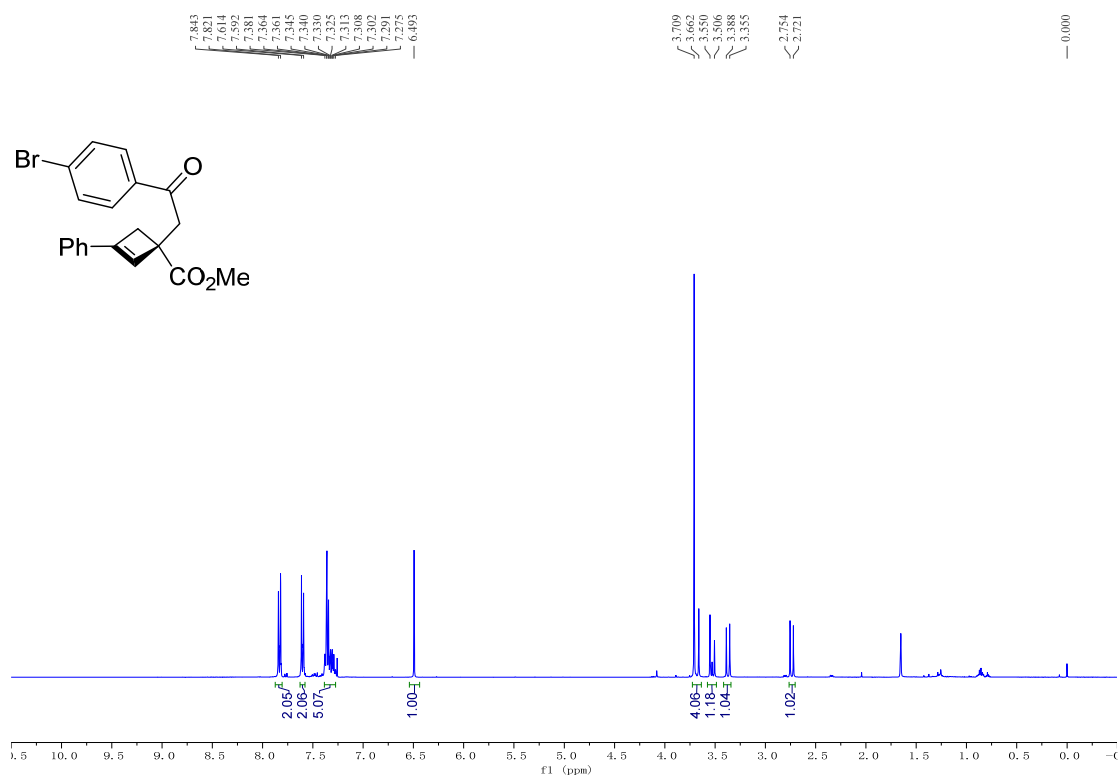 **$^{13}\text{C}$  NMR (100 MHz,  $\text{CDCl}_3$ )**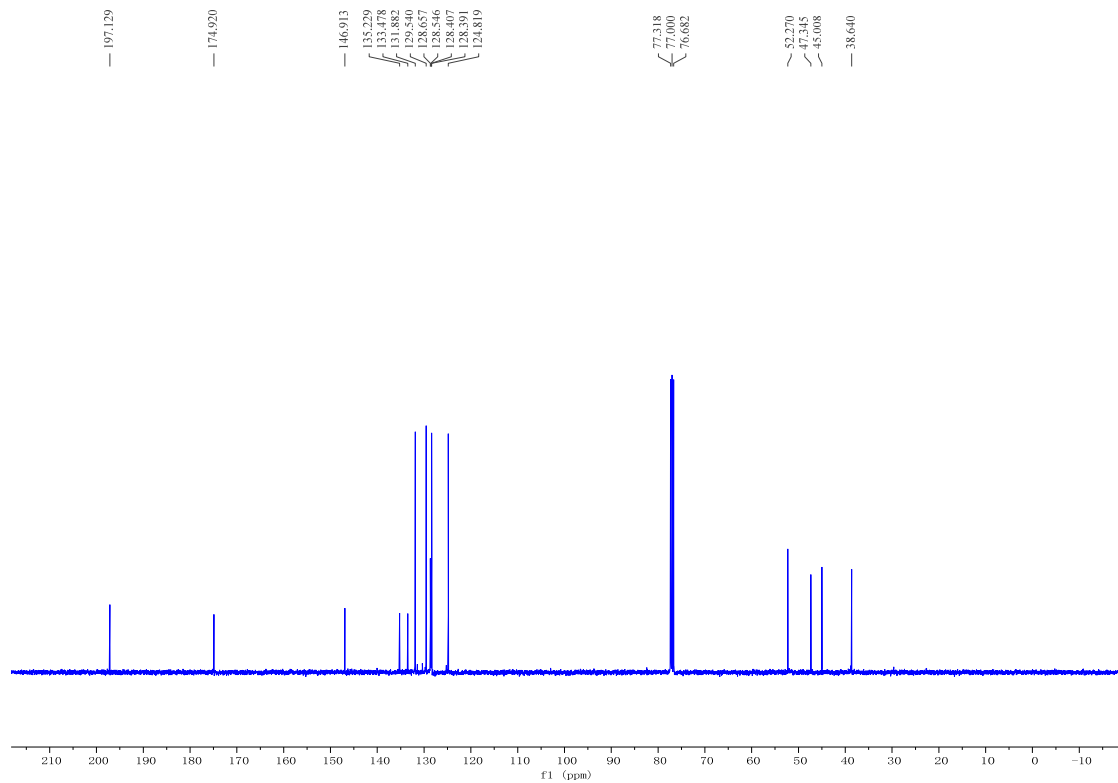

**$^1\text{H}$ ,  $^{13}\text{C}$  NMR and  $^{19}\text{F}$  NMR Spectra for Compound 3ae:** **$^1\text{H}$  NMR (400 MHz,  $\text{CDCl}_3$ )**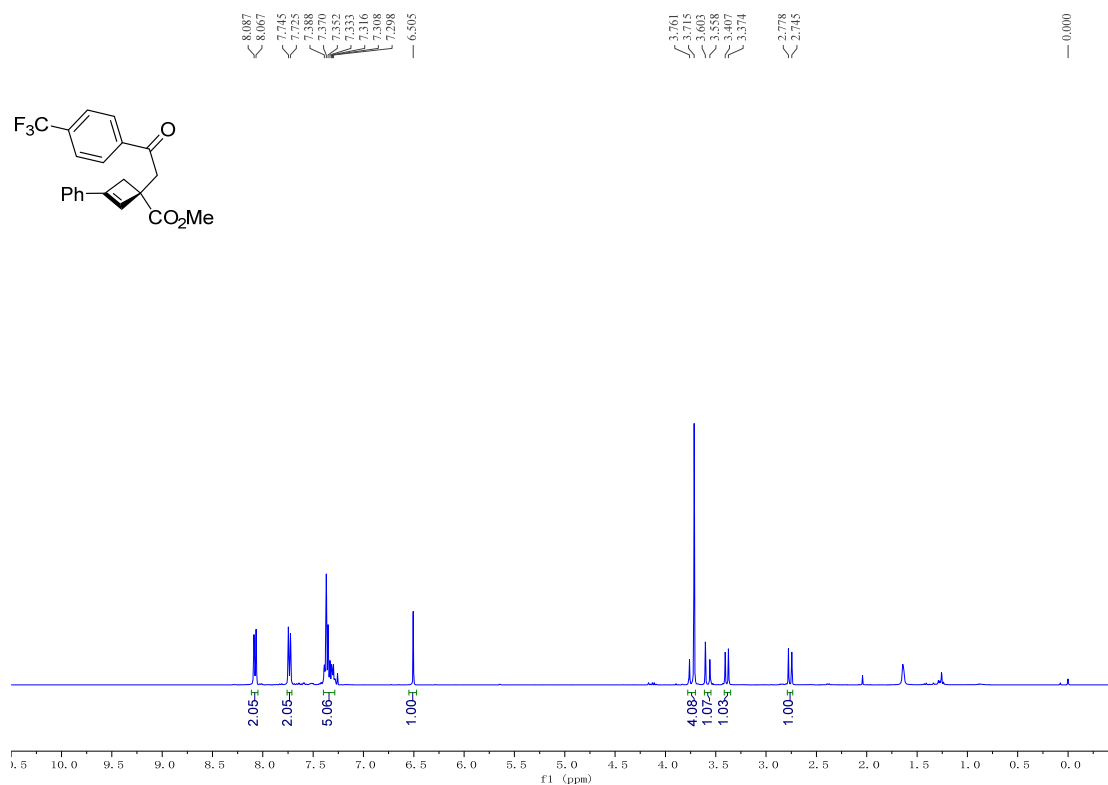 **$^{13}\text{C}$  NMR (100 MHz,  $\text{CDCl}_3$ )**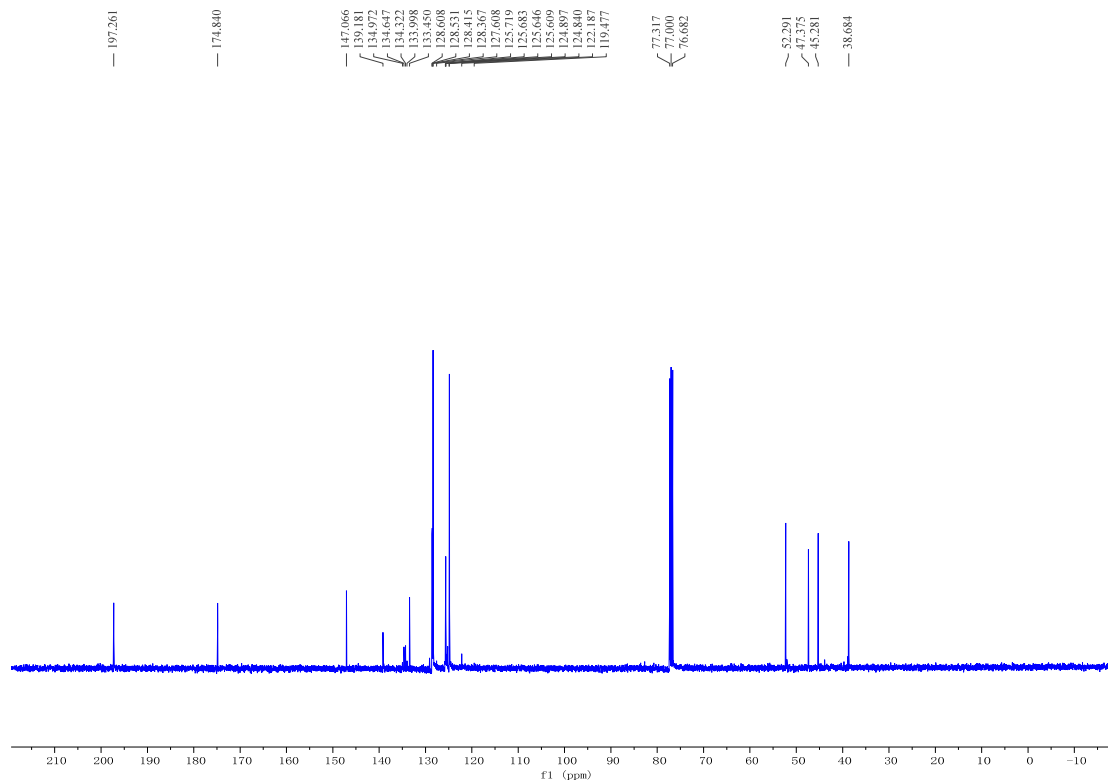



$^{19}\text{F}$  NMR (376 MHz,  $\text{CDCl}_3$ )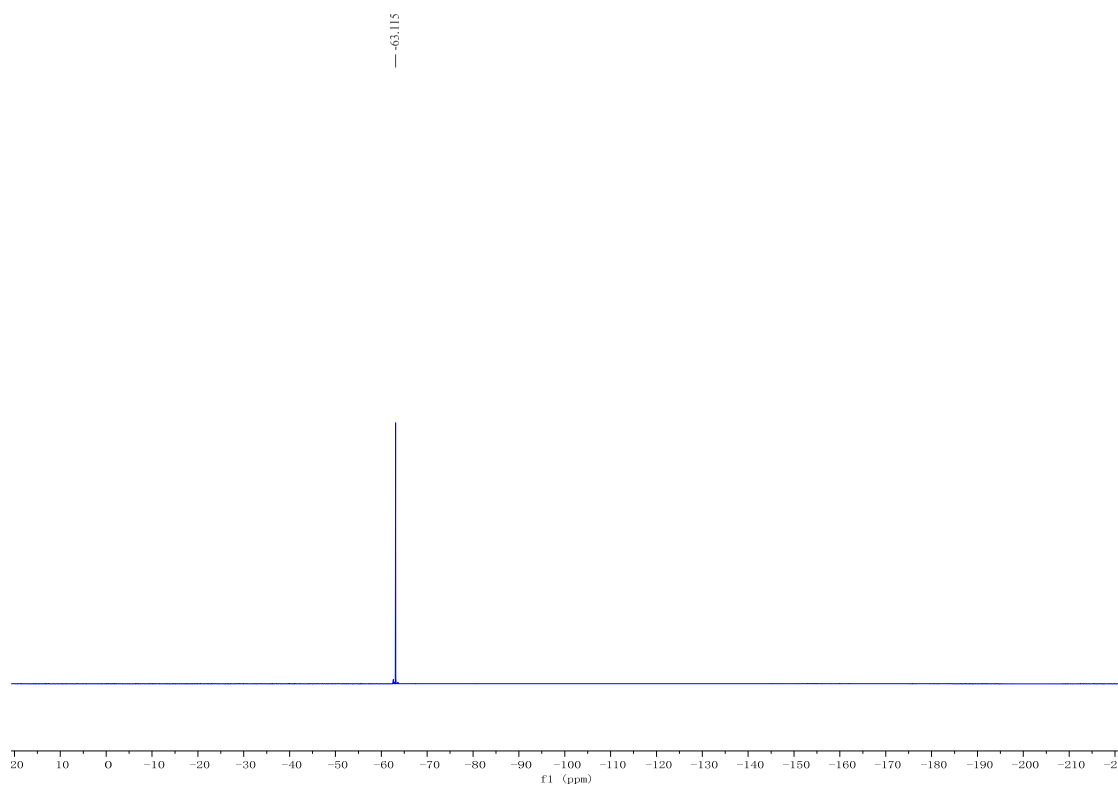 $^1\text{H}$  and  $^{13}\text{C}$  NMR Spectra for Compound 3af: $^1\text{H}$  NMR (400 MHz,  $\text{CDCl}_3$ )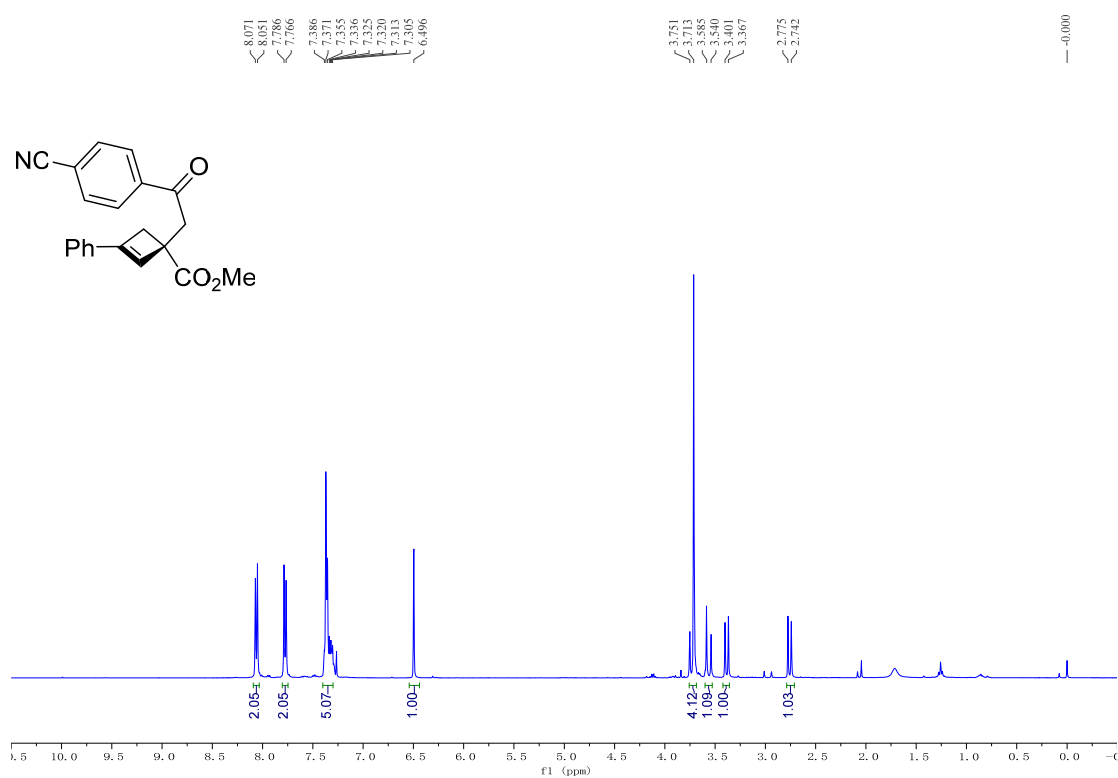

$^{13}\text{C}$  NMR (100 MHz,  $\text{CDCl}_3$ )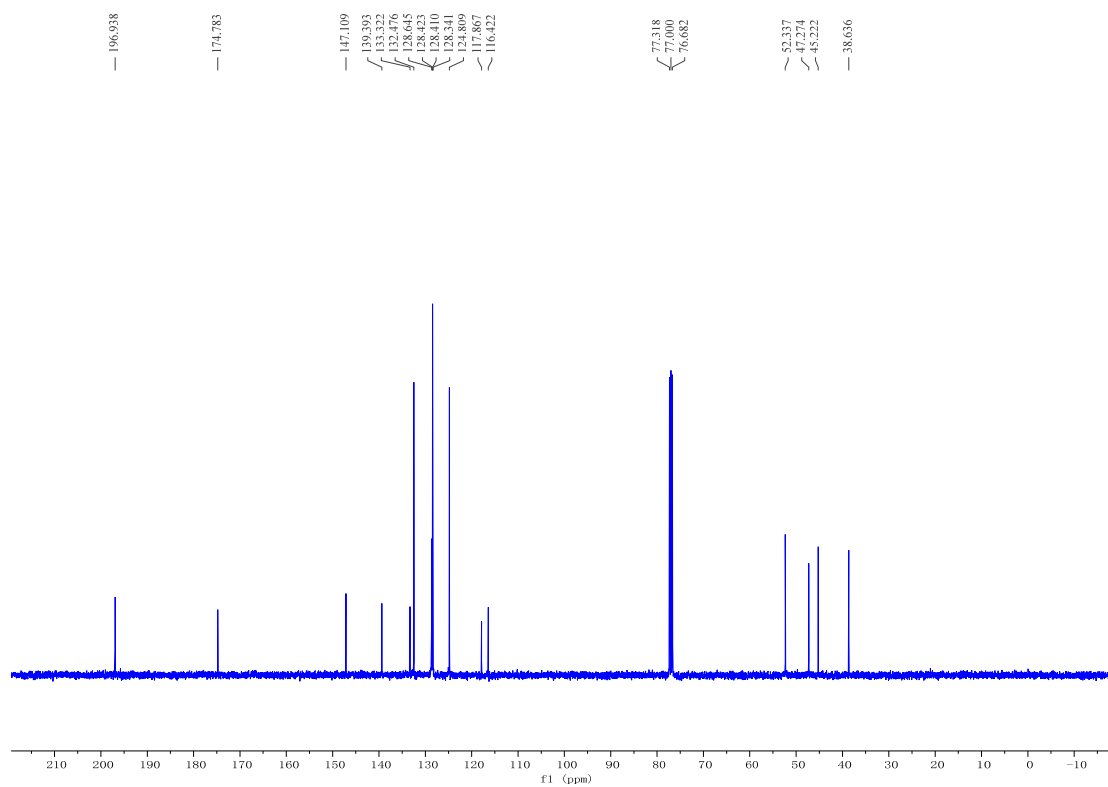 $^1\text{H}$  and  $^{13}\text{C}$  NMR Spectra for Compound 3ag: $^1\text{H}$  NMR (400 MHz,  $\text{CDCl}_3$ )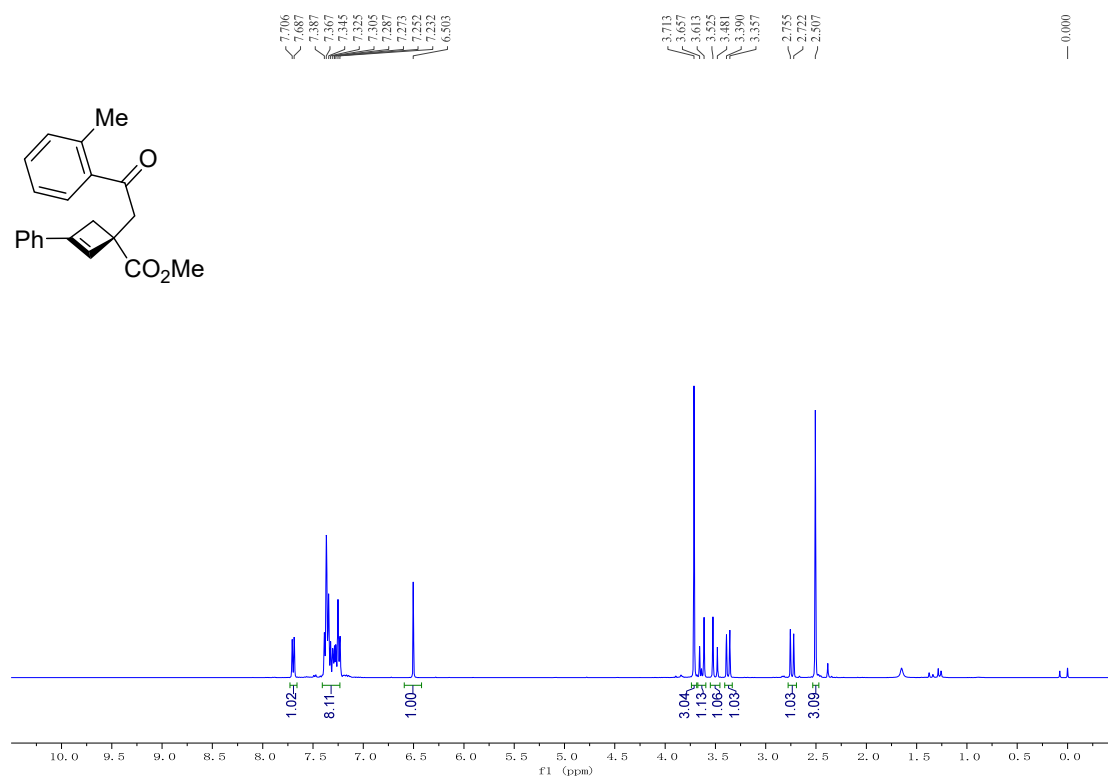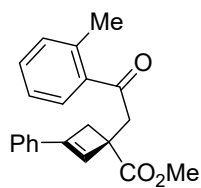

$^{13}\text{C}$  NMR (100 MHz,  $\text{CDCl}_3$ )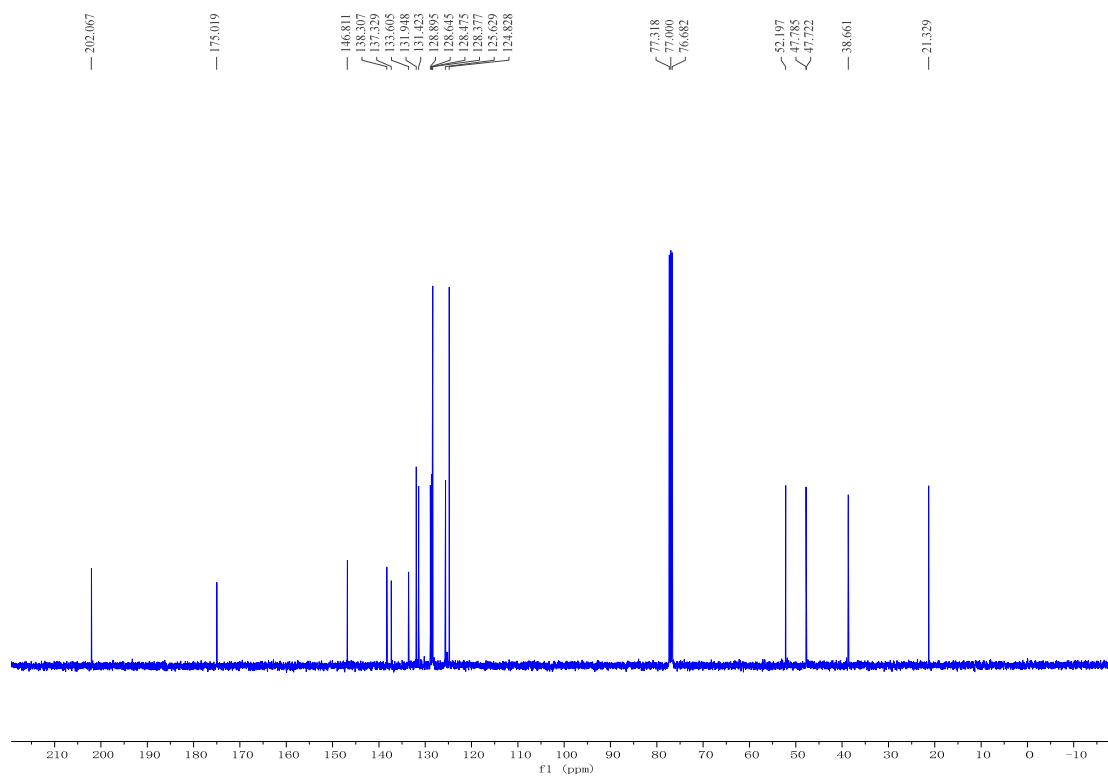 $^1\text{H}$  and  $^{13}\text{C}$  NMR Spectra for Compound 3ah: $^1\text{H}$  NMR (400 MHz,  $\text{CDCl}_3$ )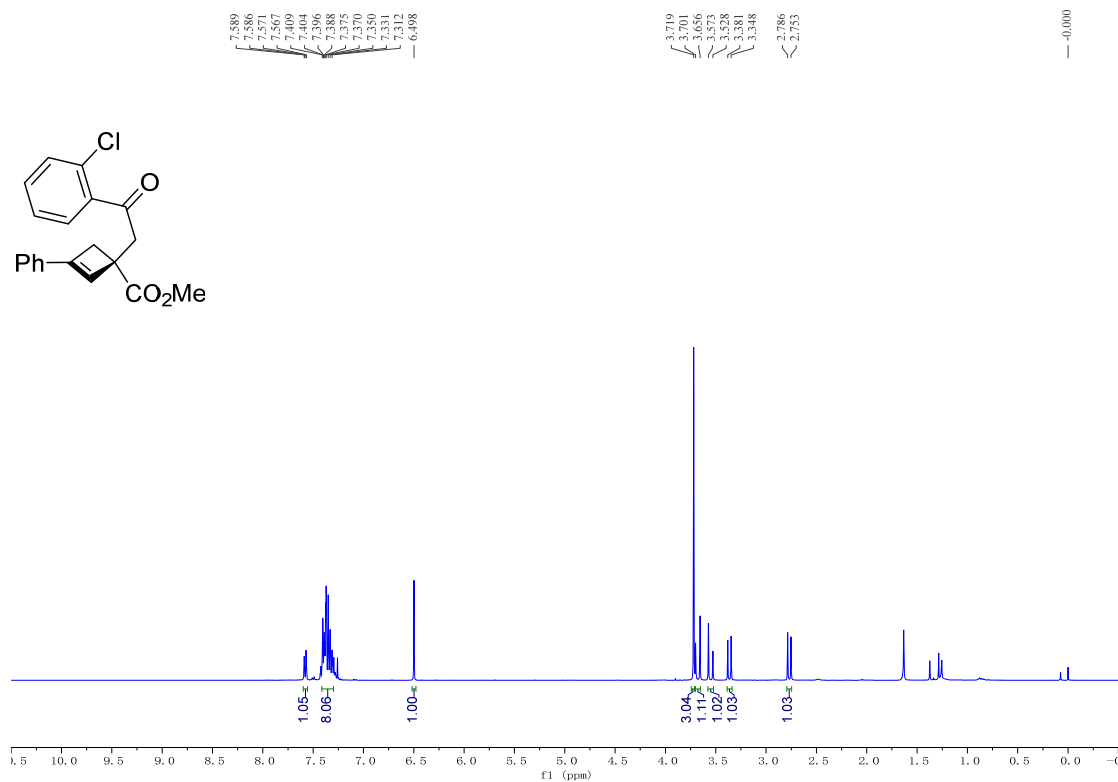

$^{13}\text{C}$  NMR (100 MHz,  $\text{CDCl}_3$ )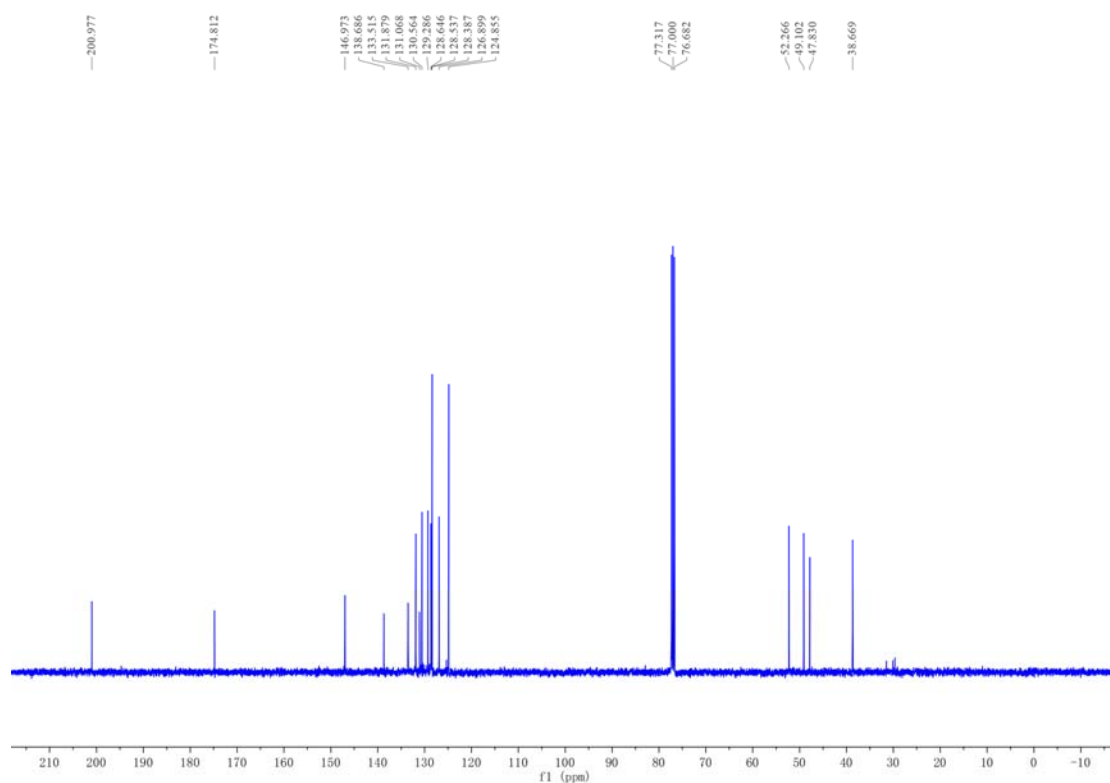 $^1\text{H}$  and  $^{13}\text{C}$  NMR Spectra for Compound 3ai: $^1\text{H}$  NMR (400 MHz,  $\text{CDCl}_3$ )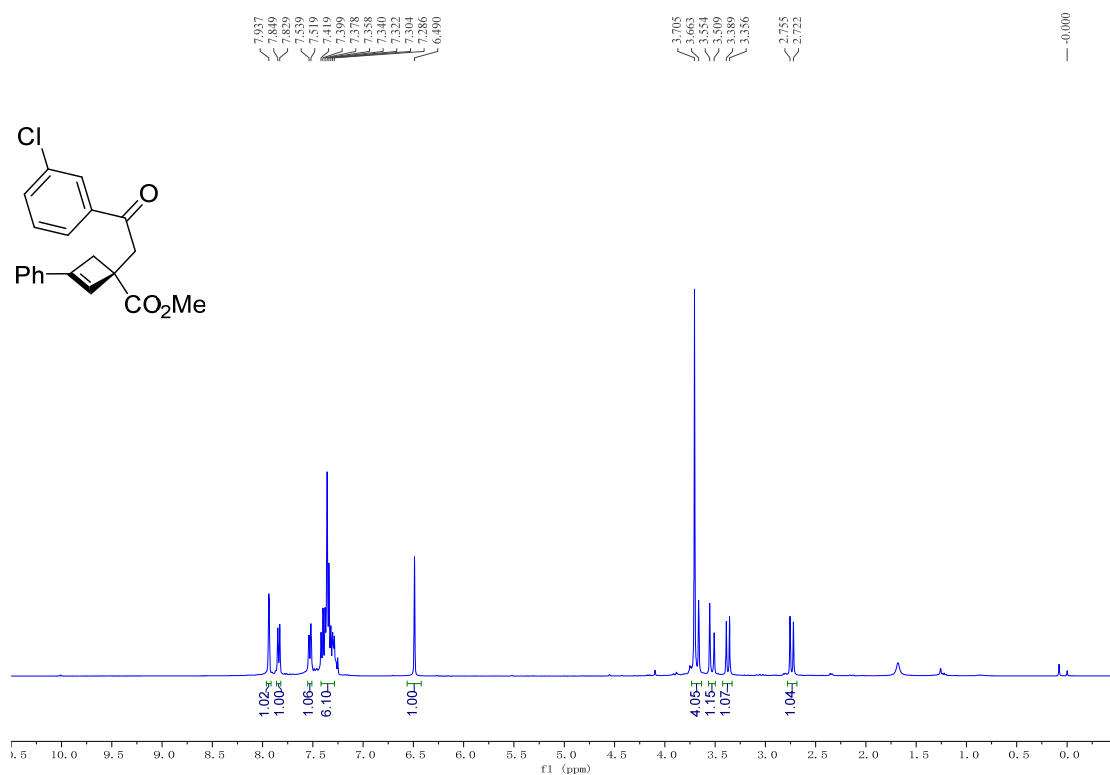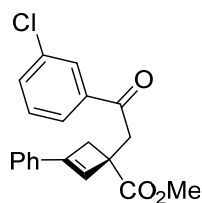

$^{13}\text{C}$  NMR (100 MHz,  $\text{CDCl}_3$ )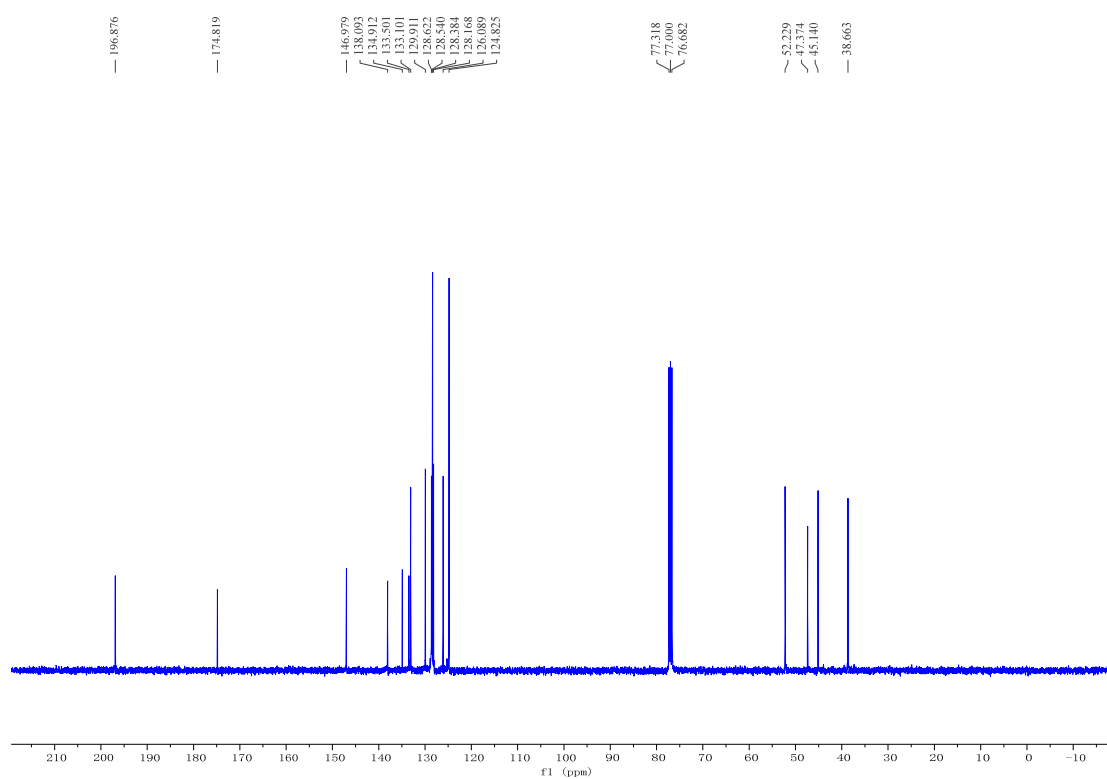 $^1\text{H}$  and  $^{13}\text{C}$  NMR Spectra for Compound 3aj: $^1\text{H}$  NMR (400 MHz,  $\text{CDCl}_3$ )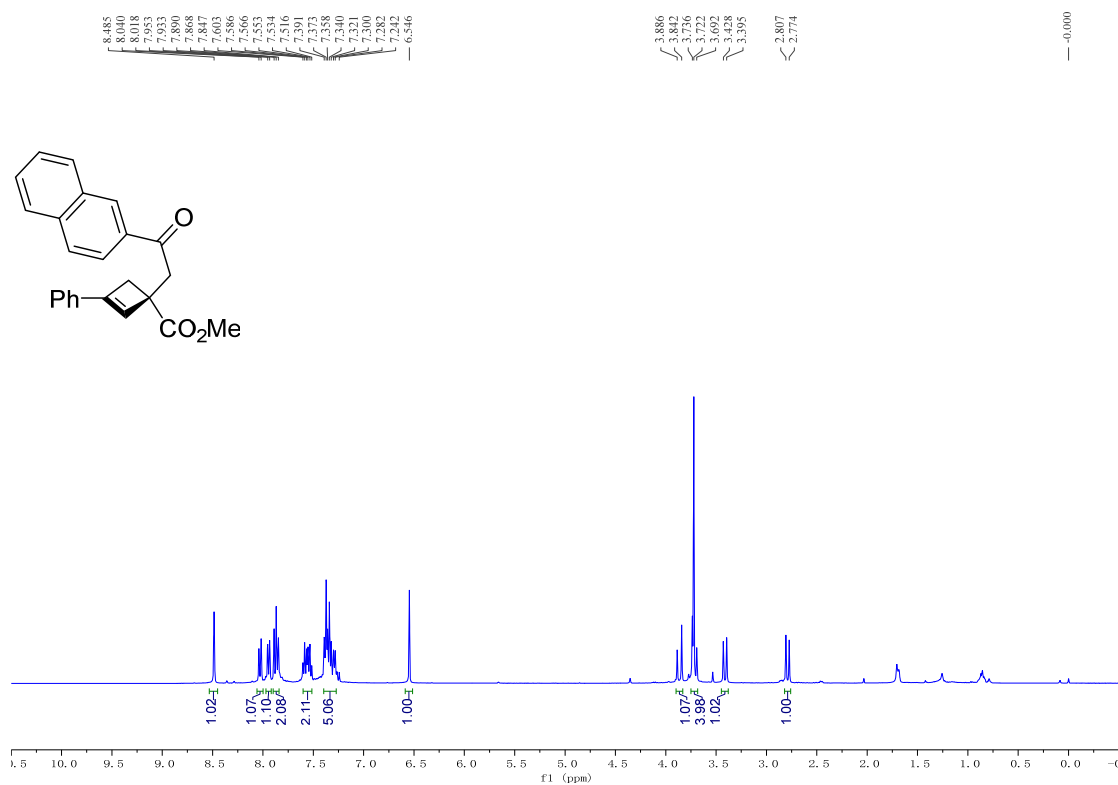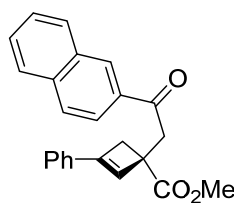

$^{13}\text{C}$  NMR (100 MHz,  $\text{CDCl}_3$ )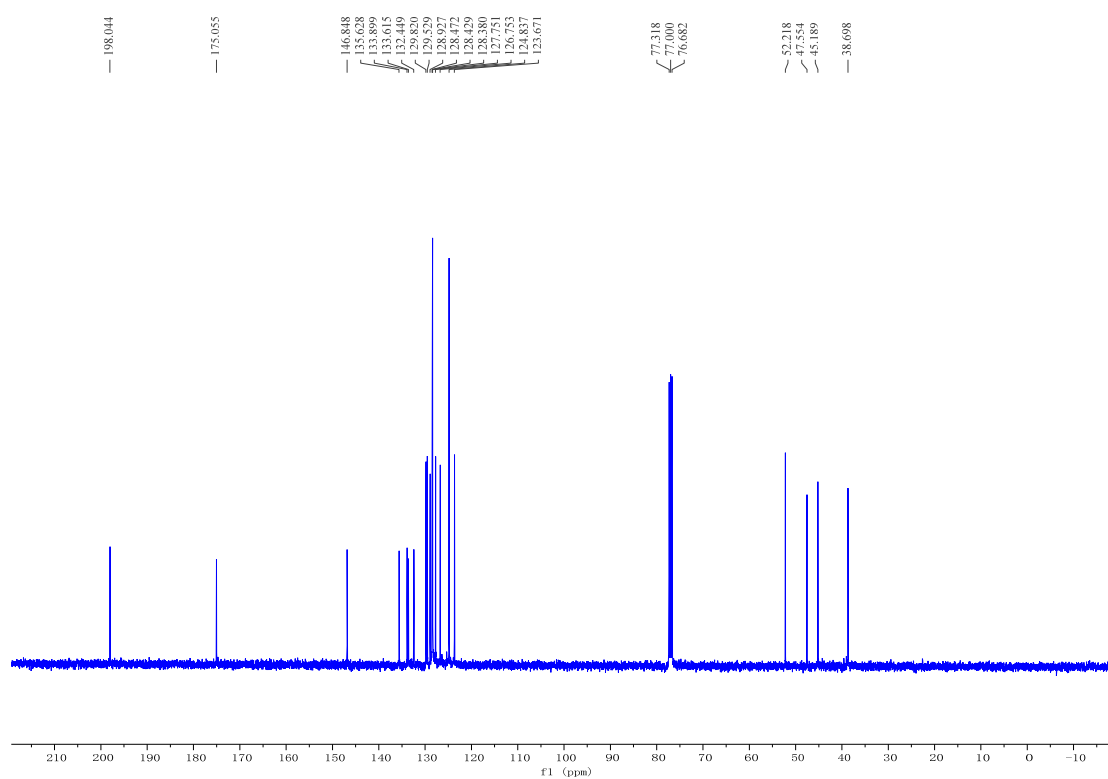 $^1\text{H}$  and  $^{13}\text{C}$  NMR Spectra for Compound 3ak: $^1\text{H}$  NMR (400 MHz,  $\text{CDCl}_3$ )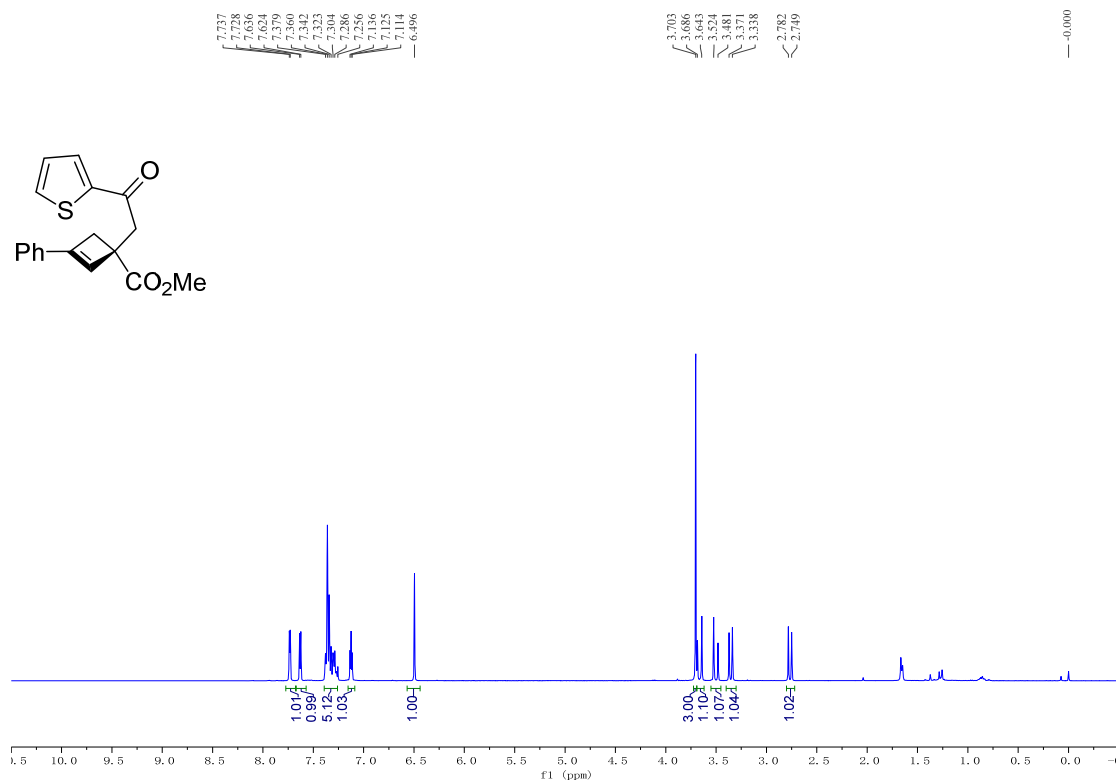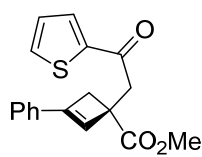

$^{13}\text{C}$  NMR (100 MHz,  $\text{CDCl}_3$ )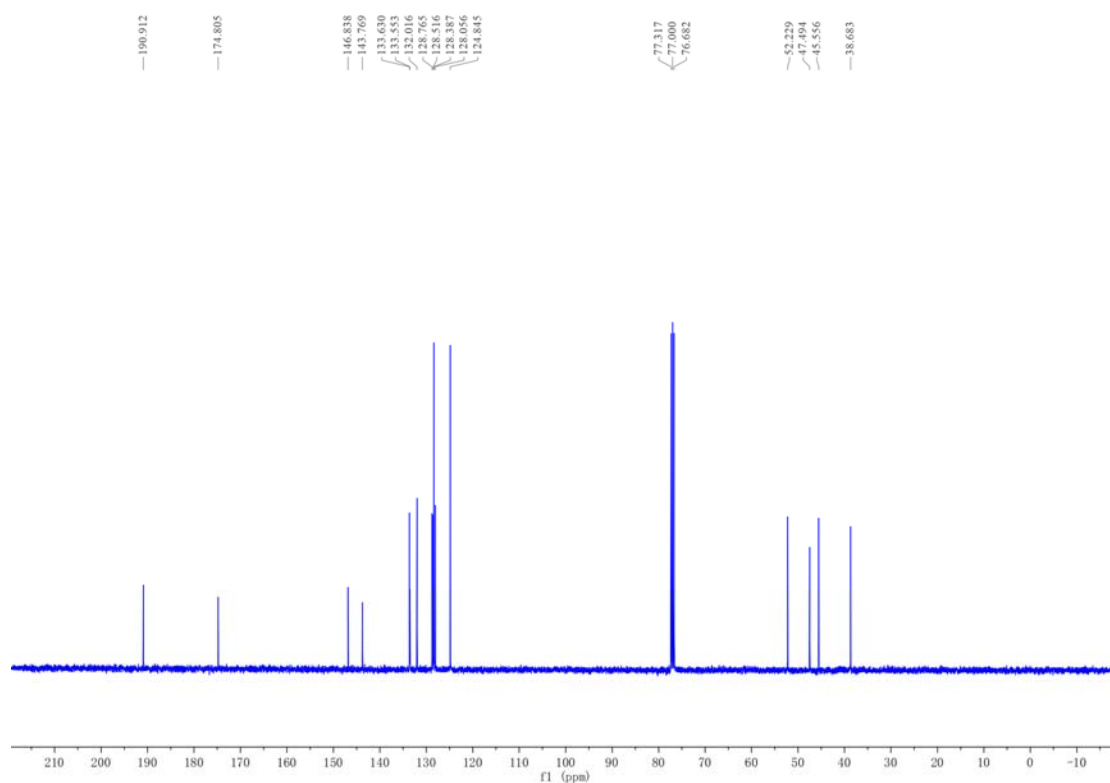 $^1\text{H}$  and  $^{13}\text{C}$  NMR Spectra for Compound 3al: $^1\text{H}$  NMR (400 MHz,  $\text{CDCl}_3$ )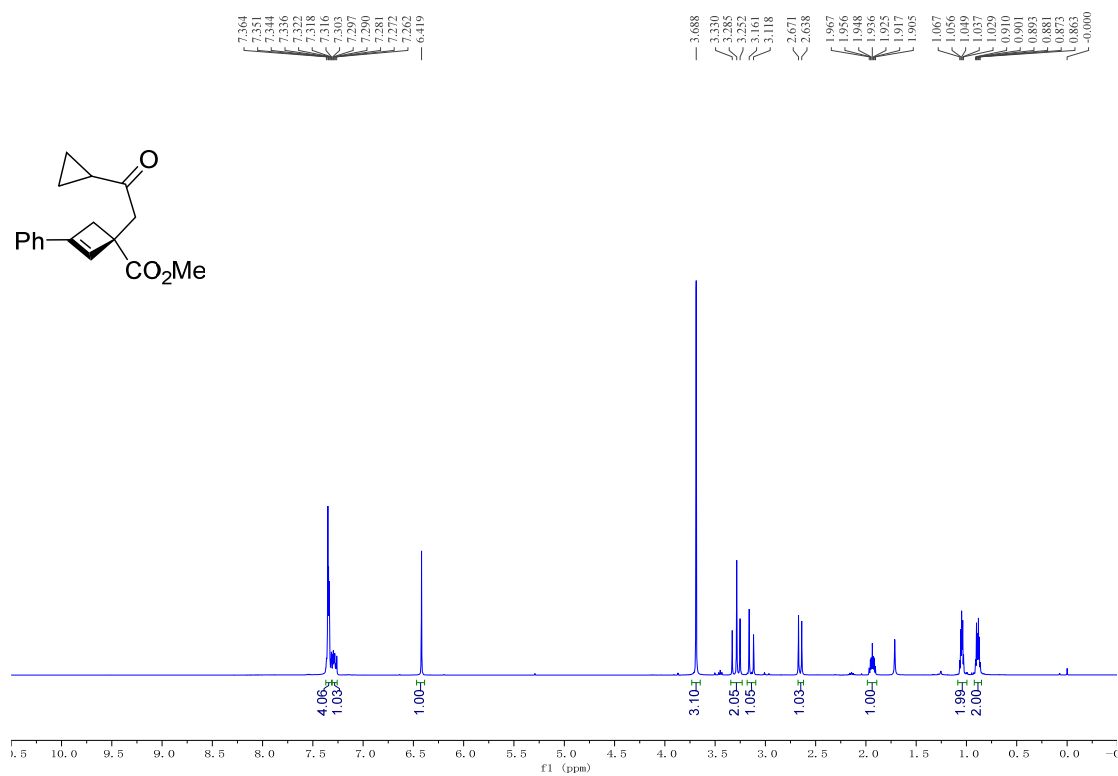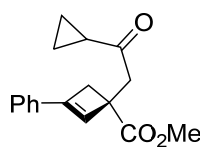

$^{13}\text{C}$  NMR (100 MHz,  $\text{CDCl}_3$ )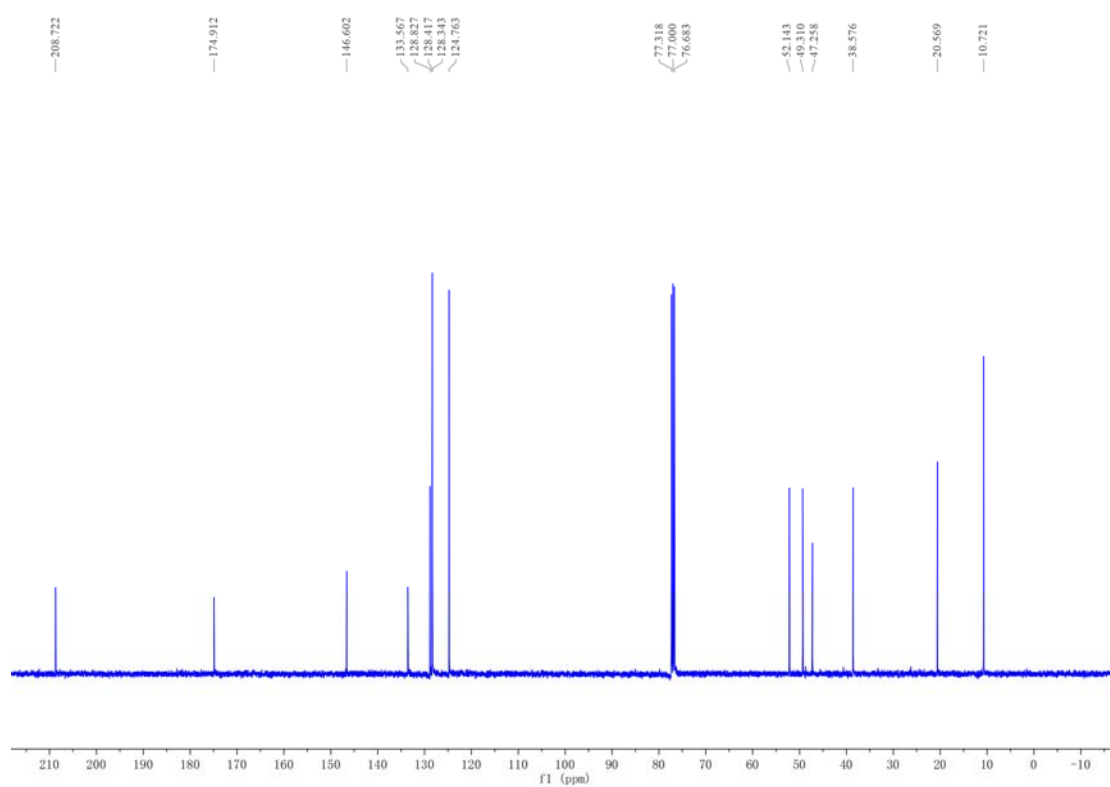 $^1\text{H}$  and  $^{13}\text{C}$  NMR Spectra for Compound 3am: $^1\text{H}$  NMR (400 MHz,  $\text{CDCl}_3$ )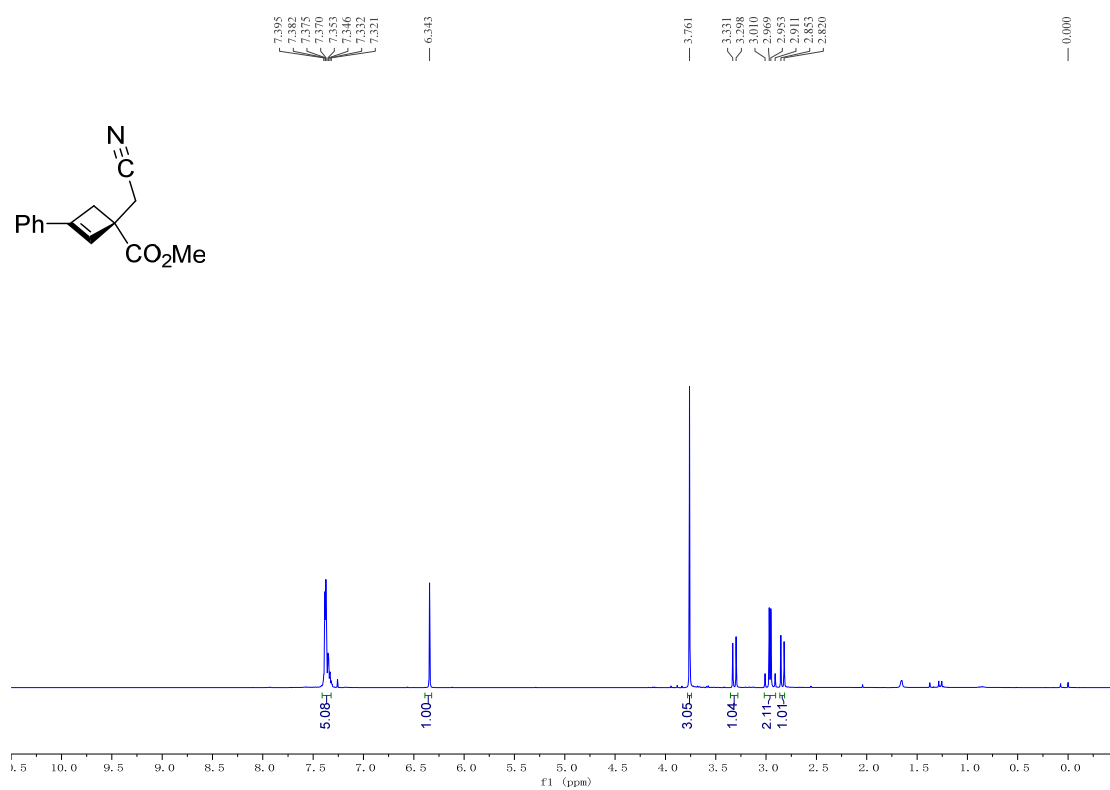



$^{13}\text{C}$  NMR (100 MHz,  $\text{CDCl}_3$ )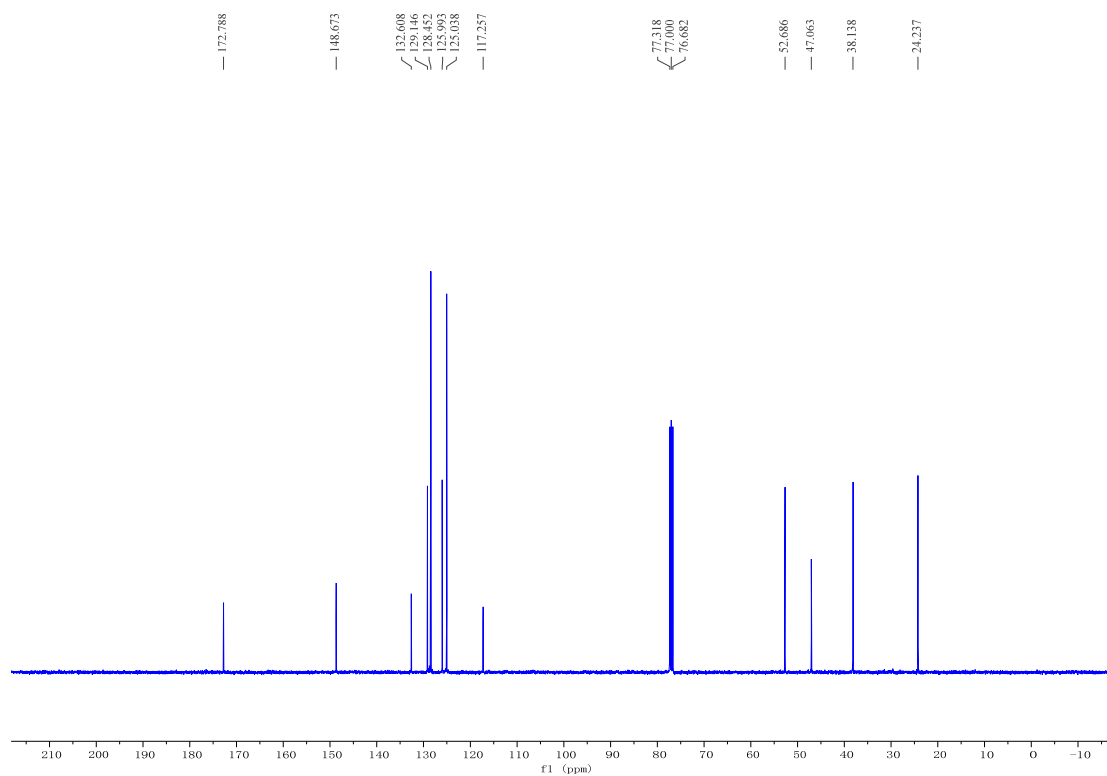 $^1\text{H}$  and  $^{13}\text{C}$  NMR Spectra for Compound 3an: $^1\text{H}$  NMR (400 MHz,  $\text{CDCl}_3$ )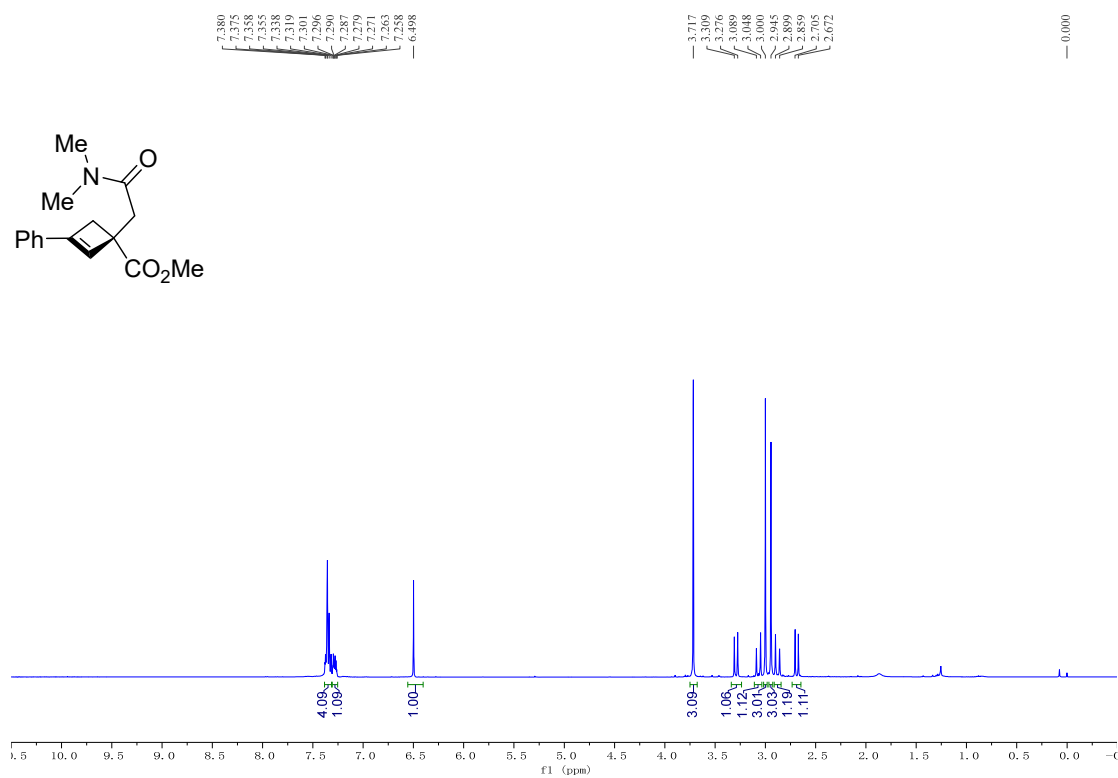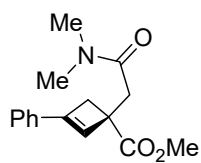

$^{13}\text{C}$  NMR (100 MHz,  $\text{CDCl}_3$ )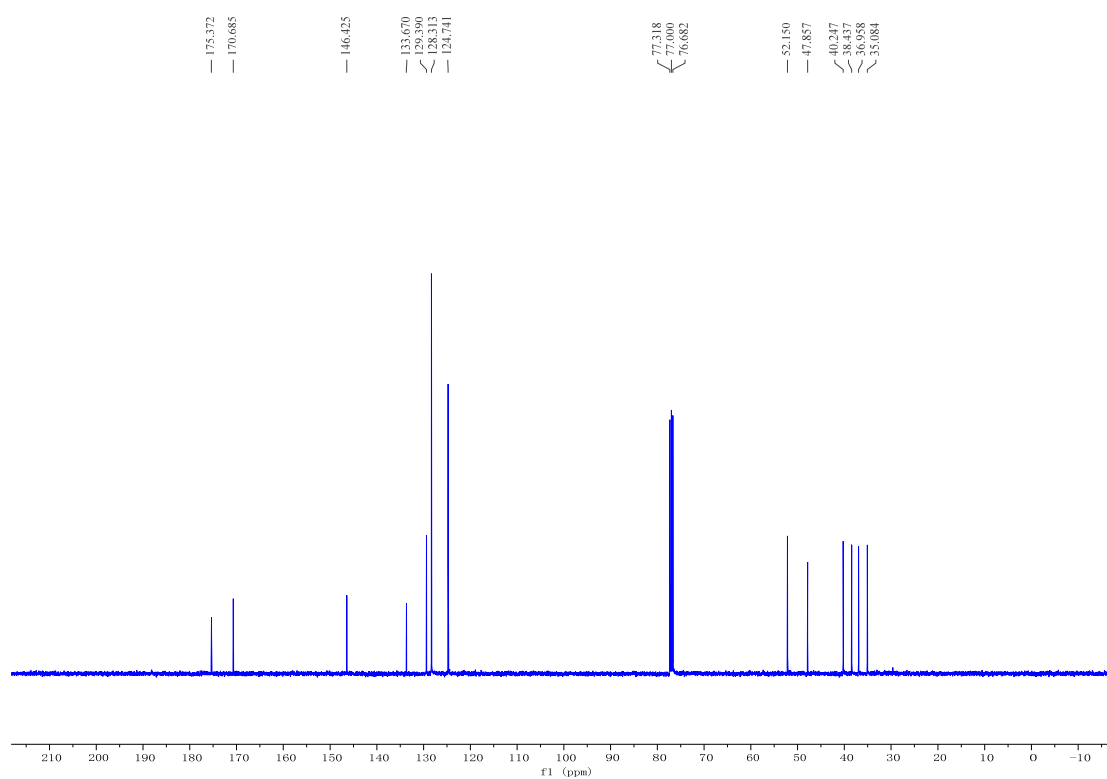 $^1\text{H}$  and  $^{13}\text{C}$  NMR Spectra for Compound 3ao: $^1\text{H}$  NMR (400 MHz,  $\text{CDCl}_3$ )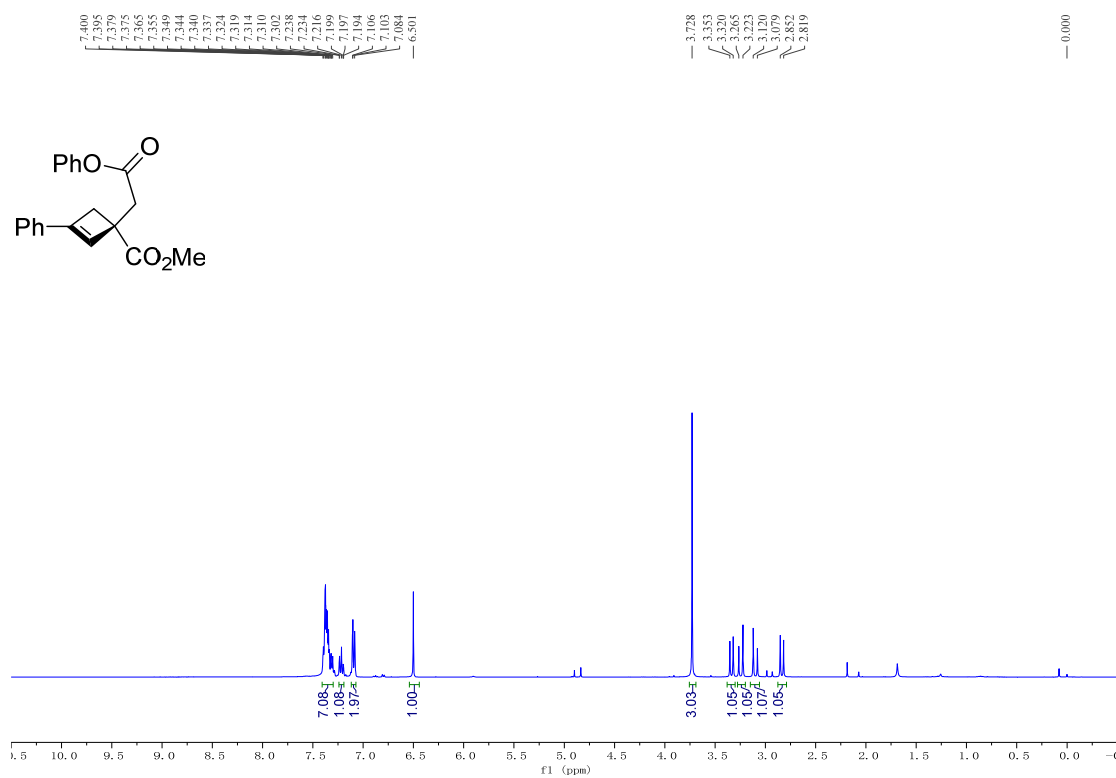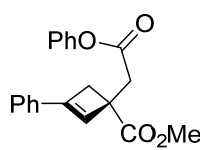

$^{13}\text{C}$  NMR (100 MHz,  $\text{CDCl}_3$ )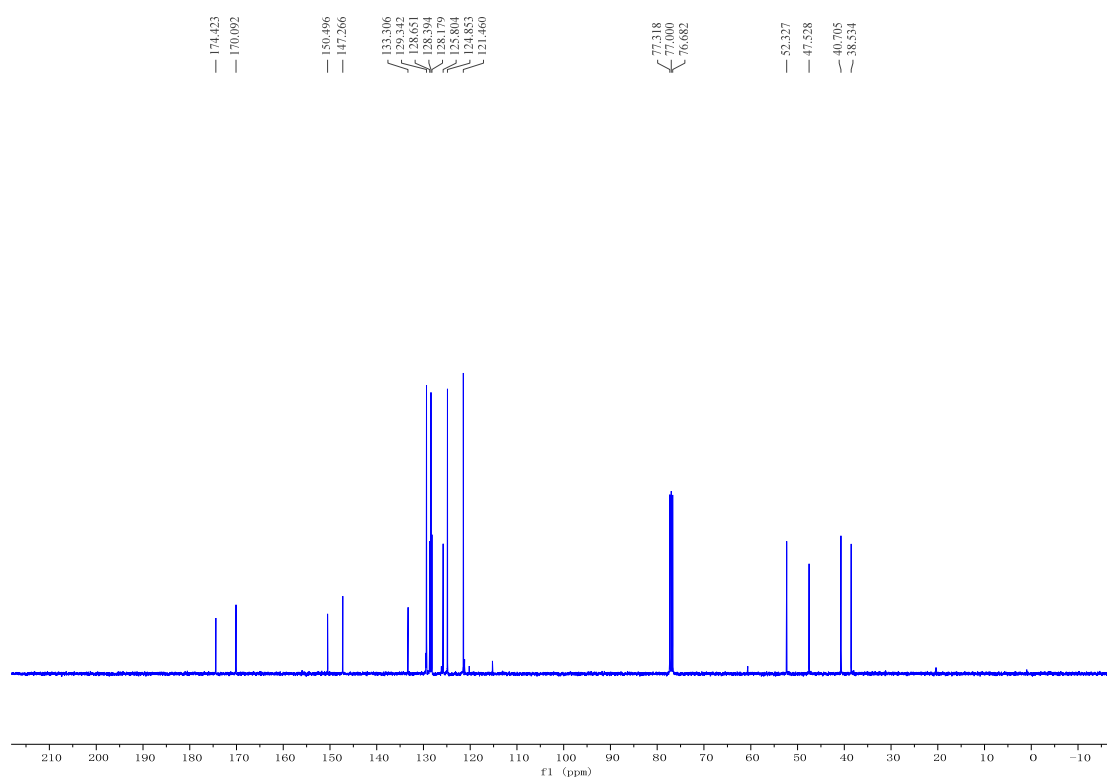 $^1\text{H}$  and  $^{13}\text{C}$  NMR Spectra for Compound 3ap: $^1\text{H}$  NMR (400 MHz,  $\text{CDCl}_3$ )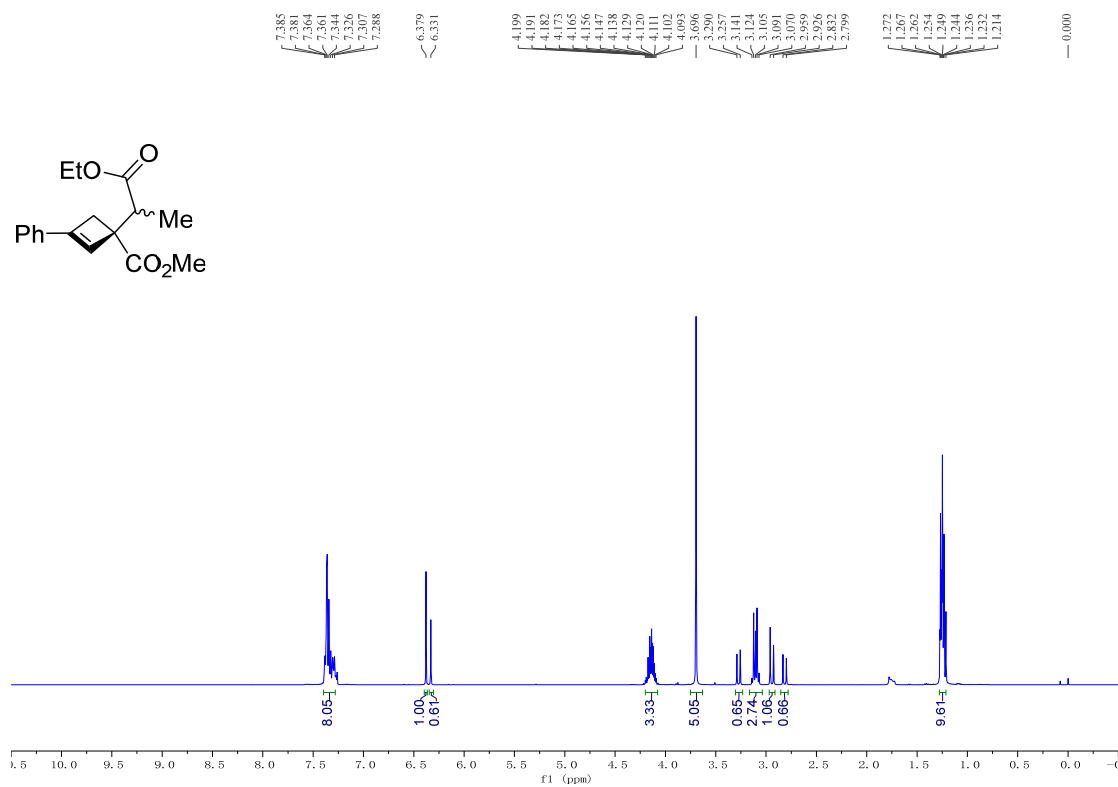

<sup>13</sup>C NMR (100 MHz, CDCl<sub>3</sub>)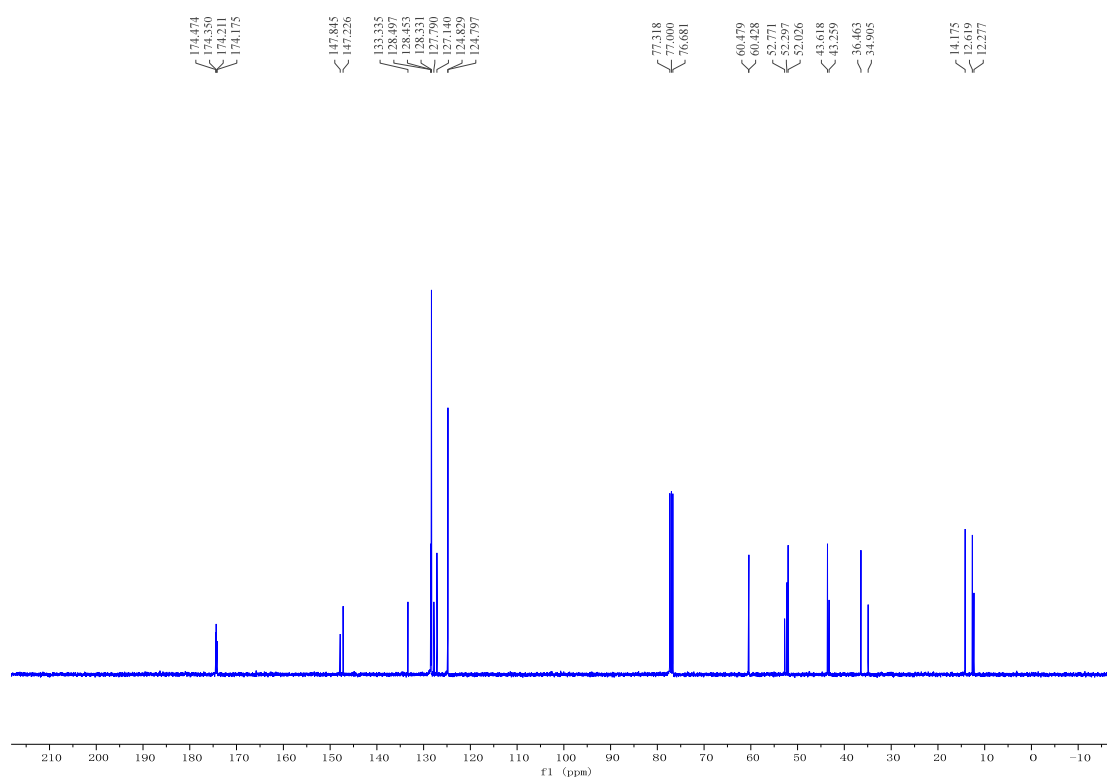<sup>1</sup>H and <sup>13</sup>C NMR Spectra for Compound 3aq:<sup>1</sup>H NMR (400 MHz, CDCl<sub>3</sub>)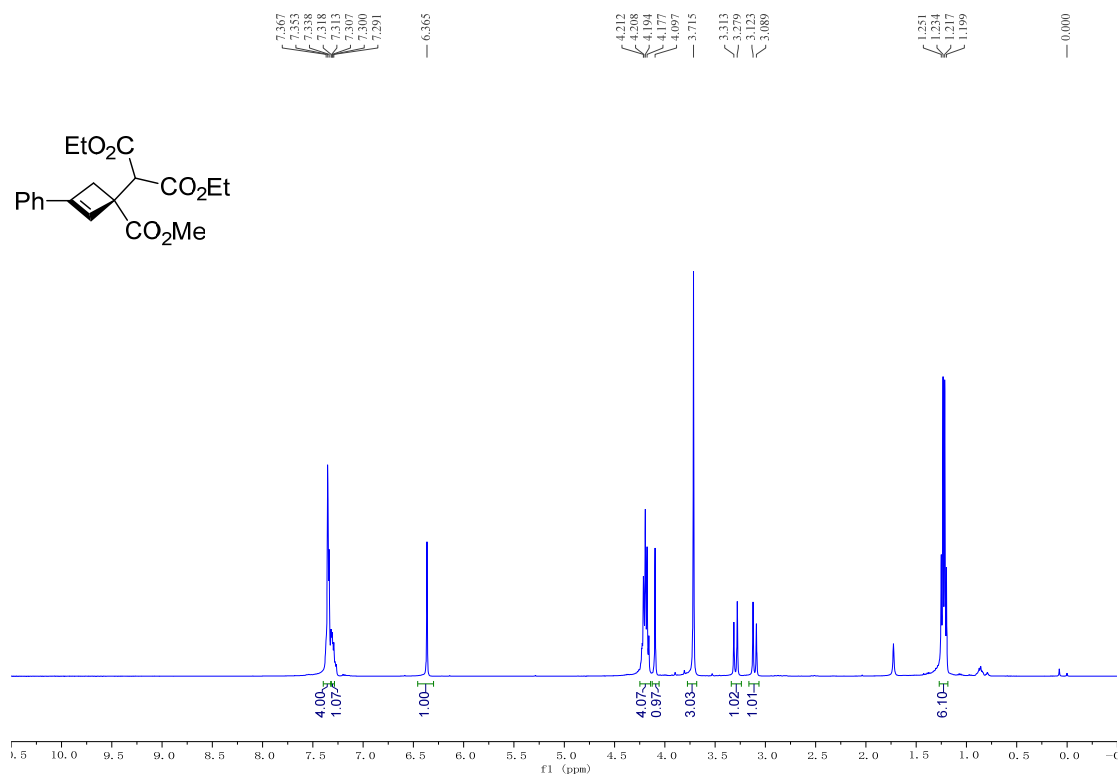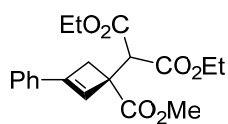

$^{13}\text{C}$  NMR (100 MHz,  $\text{CDCl}_3$ )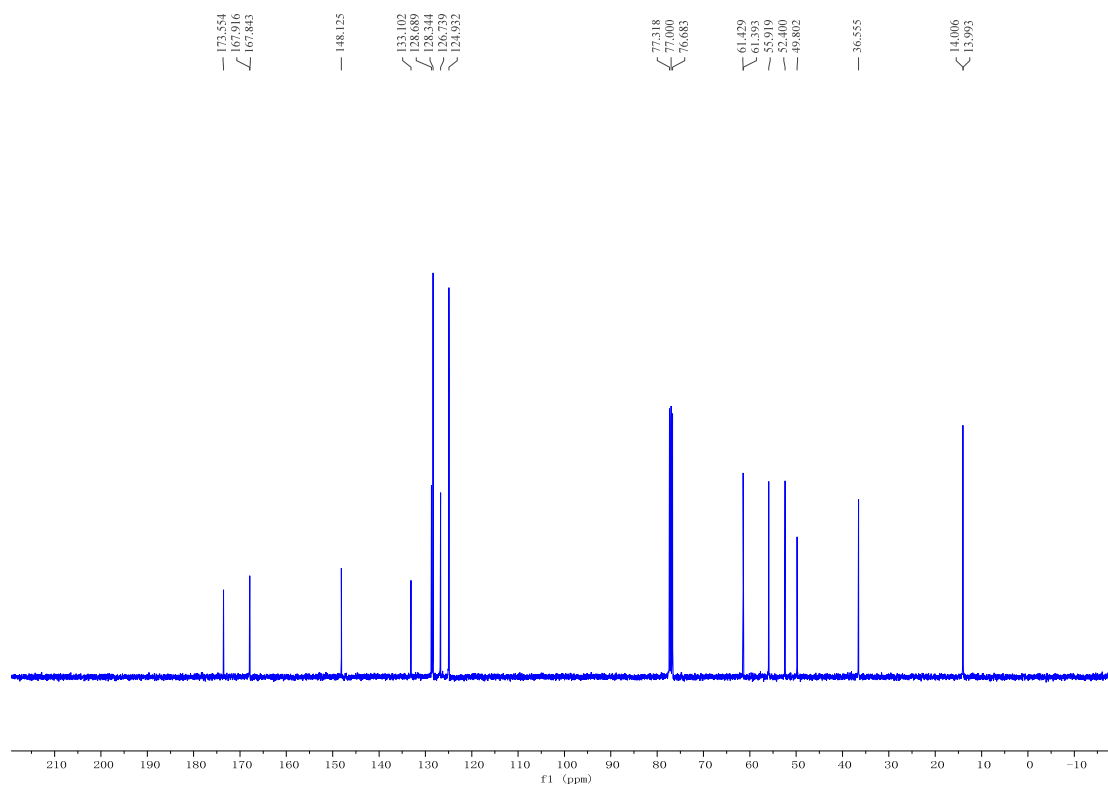 $^1\text{H}$  and  $^{13}\text{C}$  NMR Spectra for Compound 3ar: $^1\text{H}$  NMR (400 MHz,  $\text{CDCl}_3$ )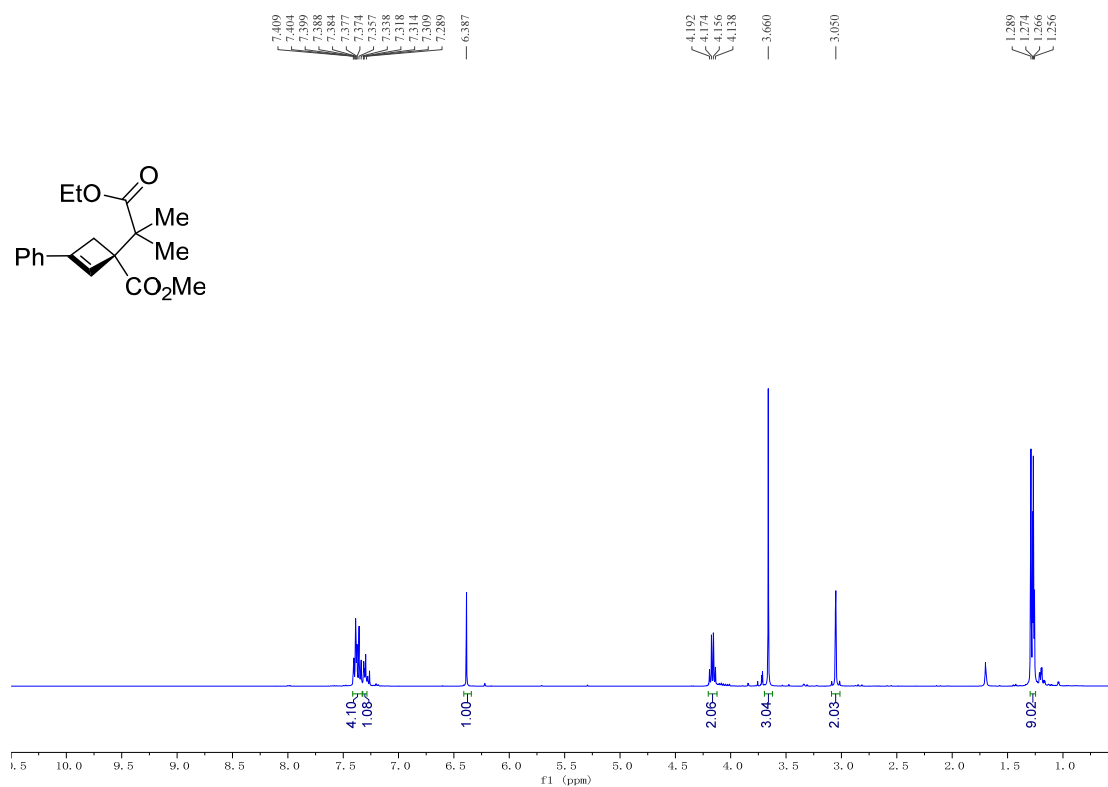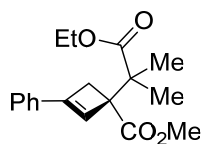

$^{13}\text{C}$  NMR (100 MHz,  $\text{CDCl}_3$ )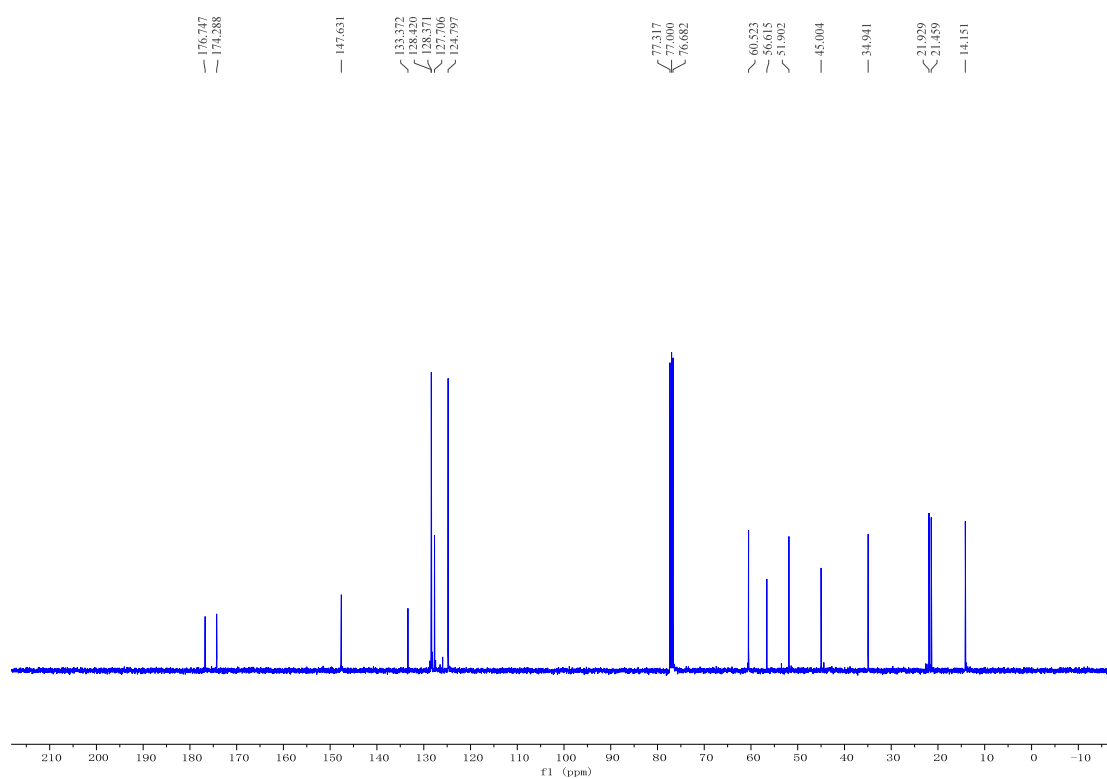 $^1\text{H}$  and  $^{13}\text{C}$  NMR Spectra for Compound 3as: $^1\text{H}$  NMR (400 MHz,  $\text{CDCl}_3$ )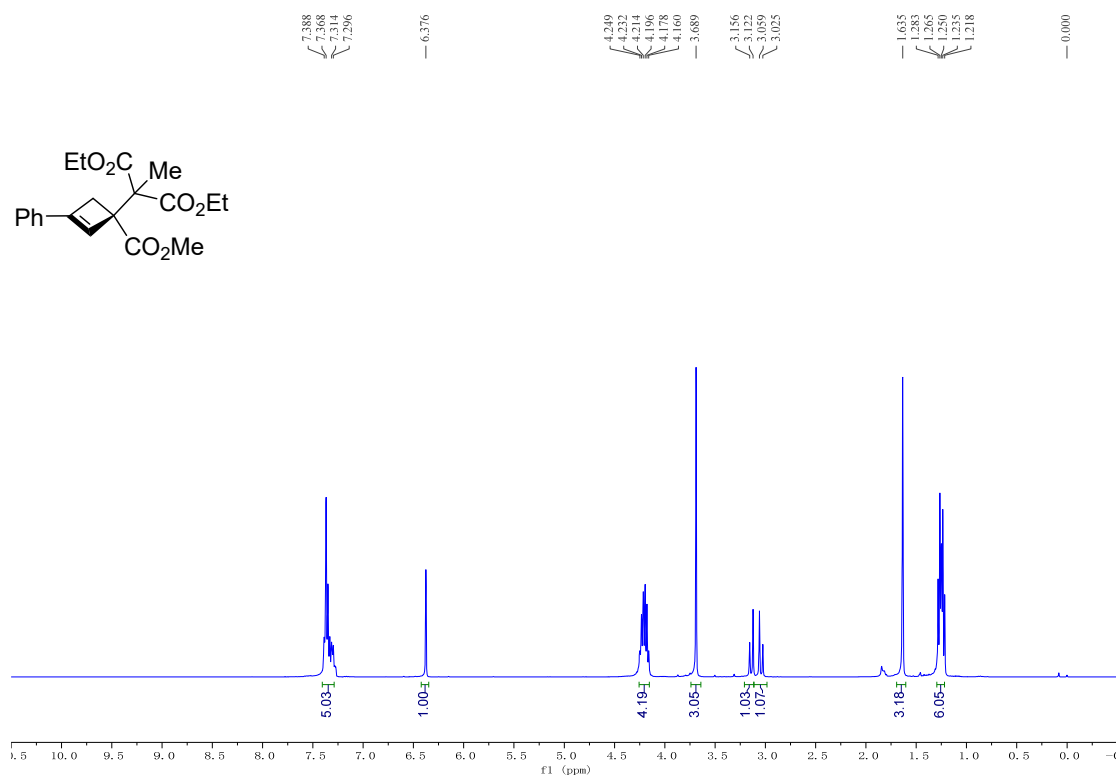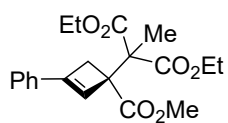

$^{13}\text{C}$  NMR (100 MHz,  $\text{CDCl}_3$ )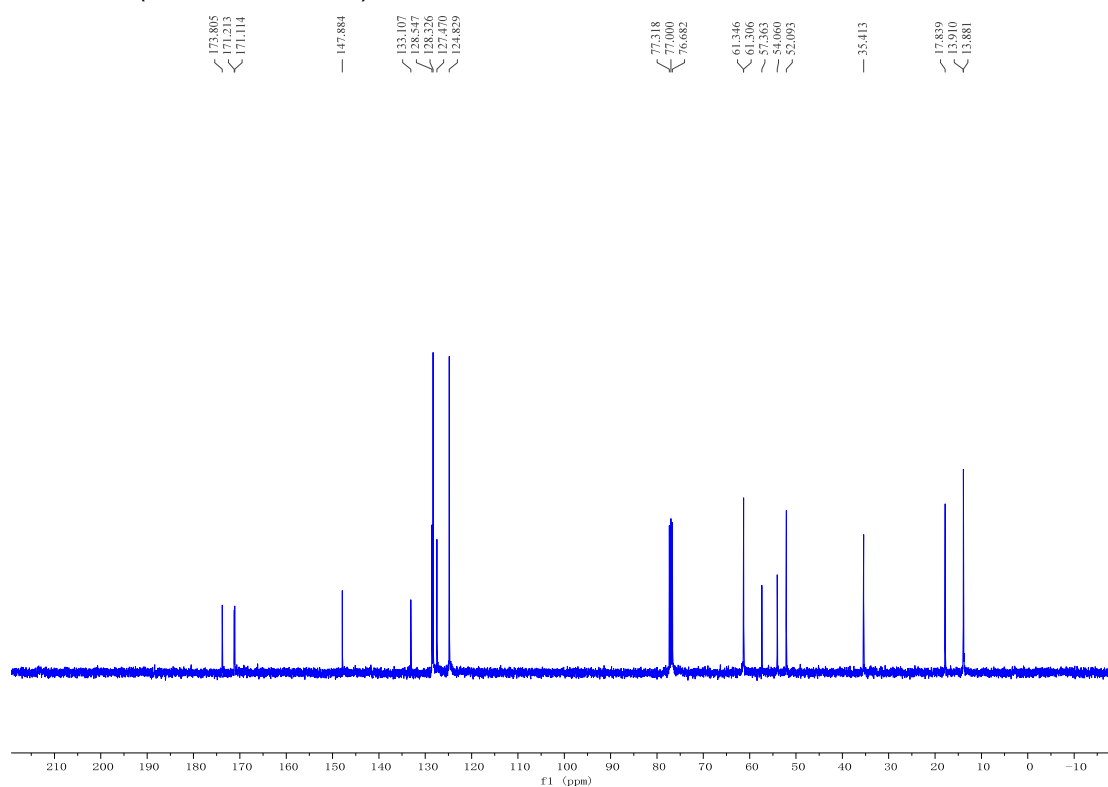 $^1\text{H}$  and  $^{13}\text{C}$  NMR Spectra for Compound 3at: $^1\text{H}$  NMR (400 MHz,  $\text{CDCl}_3$ )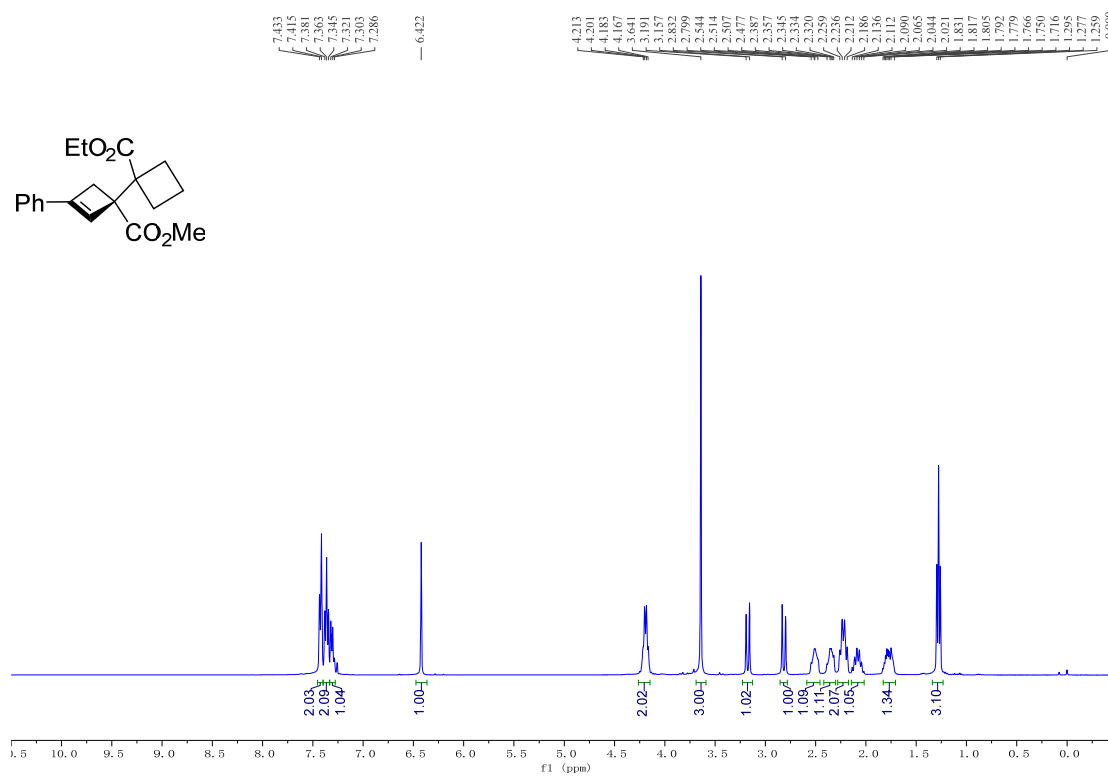

<sup>13</sup>C NMR (100 MHz, CDCl<sub>3</sub>)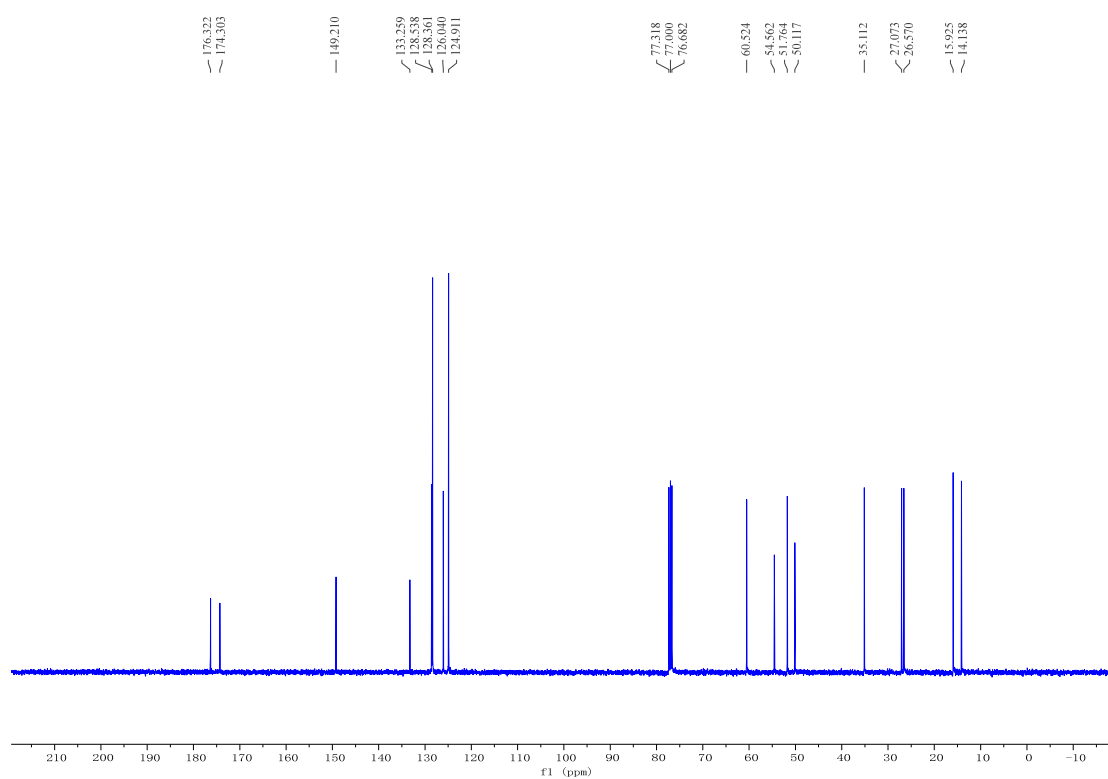<sup>1</sup>H, <sup>13</sup>C NMR and <sup>19</sup>F NMR Spectra for Compound 3au:<sup>1</sup>H NMR (400 MHz, CDCl<sub>3</sub>)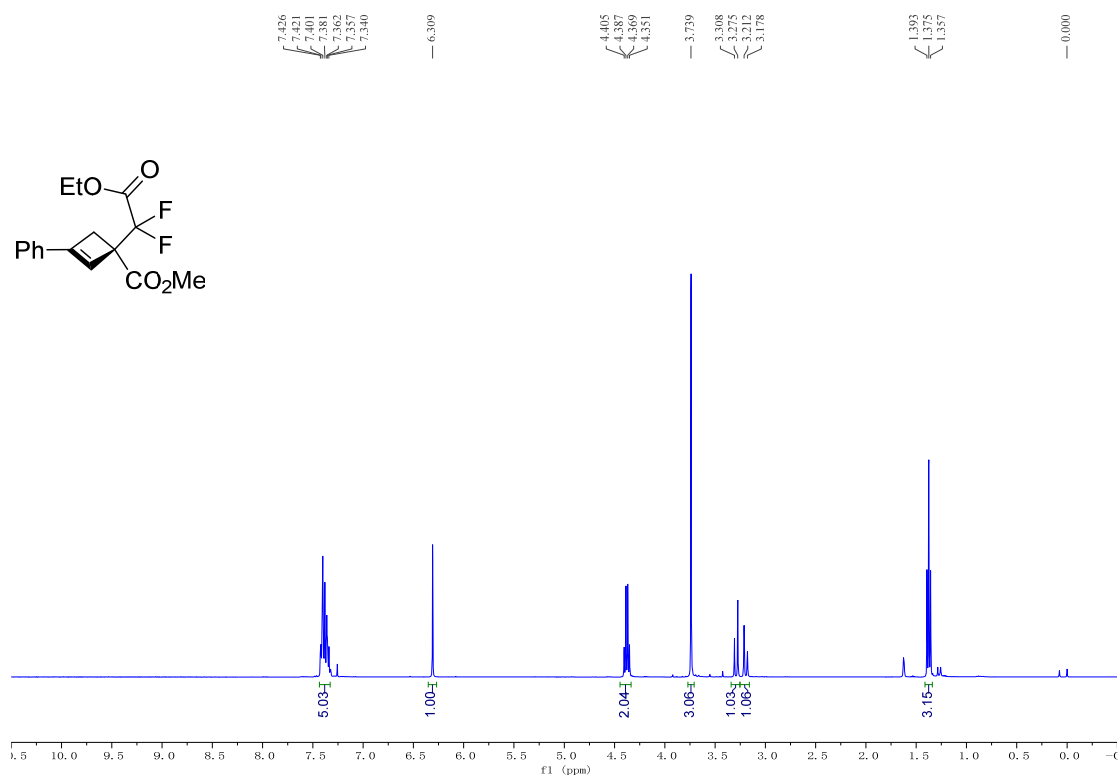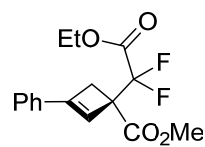



$^{13}\text{C}$  NMR (100 MHz,  $\text{CDCl}_3$ )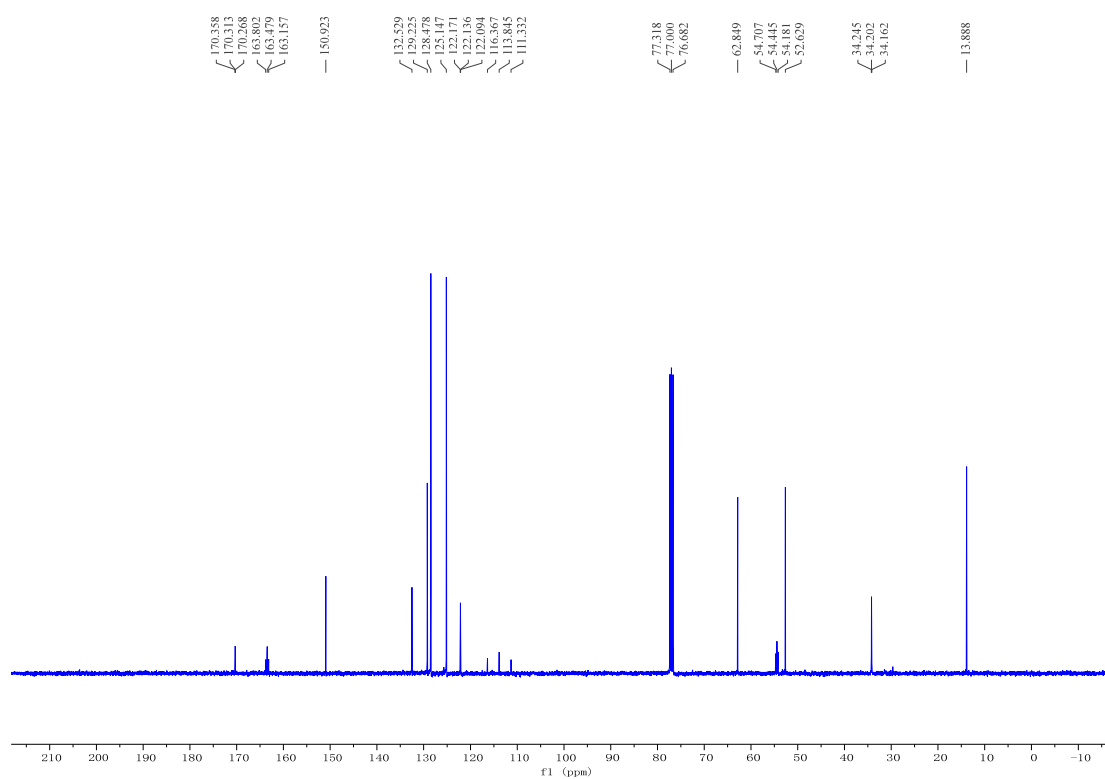 $^{19}\text{F}$  NMR (376 MHz,  $\text{CDCl}_3$ )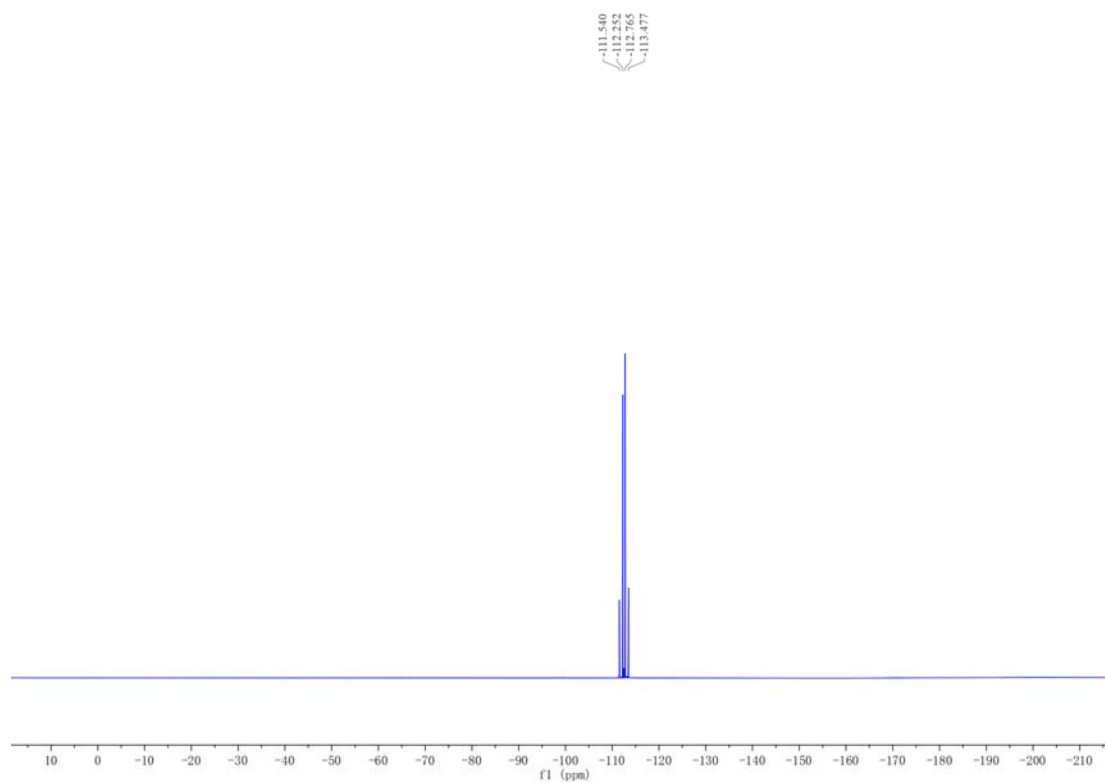

**$^1\text{H}$  and  $^{13}\text{C}$  NMR Spectra for Compound 3av:** $^1\text{H}$  NMR (400 MHz,  $\text{CDCl}_3$ )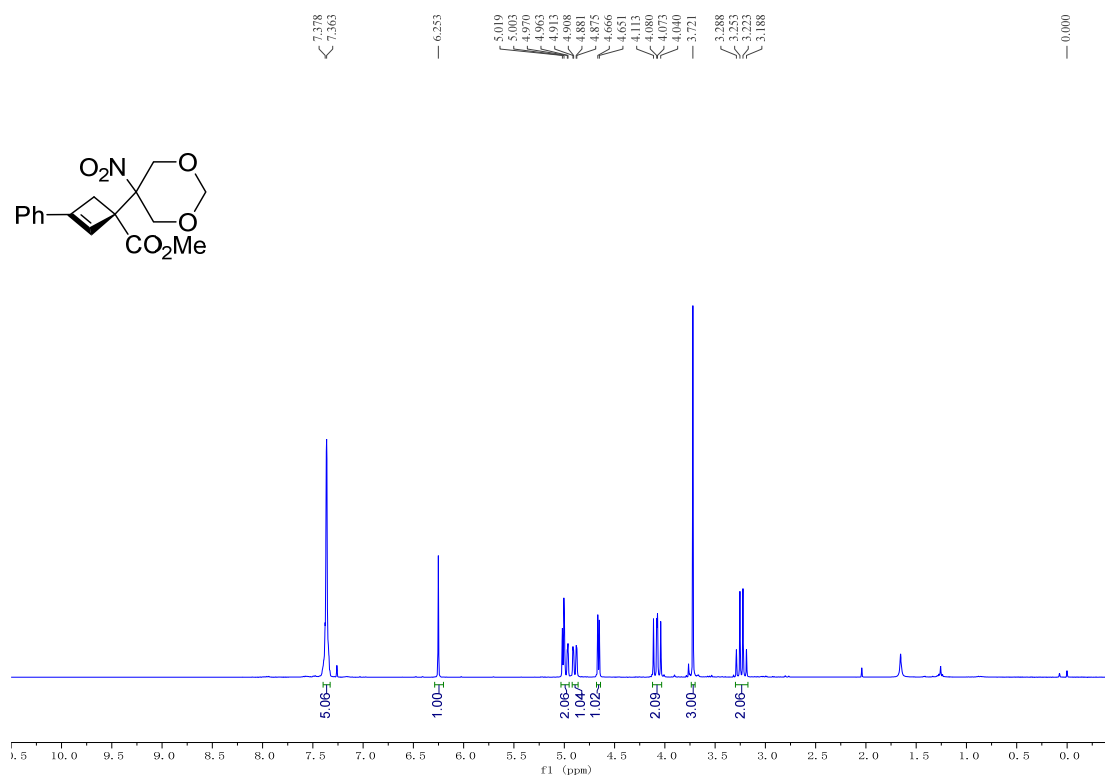 $^{13}\text{C}$  NMR (100 MHz,  $\text{CDCl}_3$ )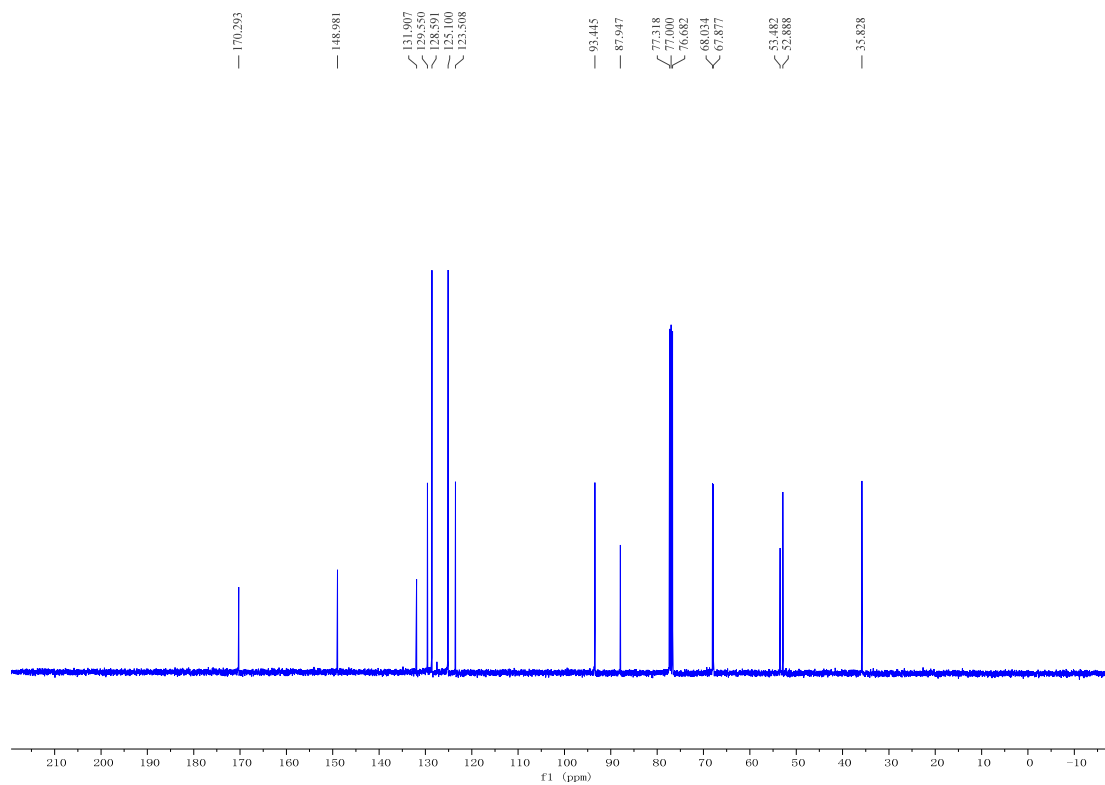

**$^1\text{H}$ ,  $^{13}\text{C}$  NMR and  $^{19}\text{F}$  NMR Spectra for Compound 3aw:** **$^1\text{H}$  NMR (400 MHz,  $\text{CDCl}_3$ )**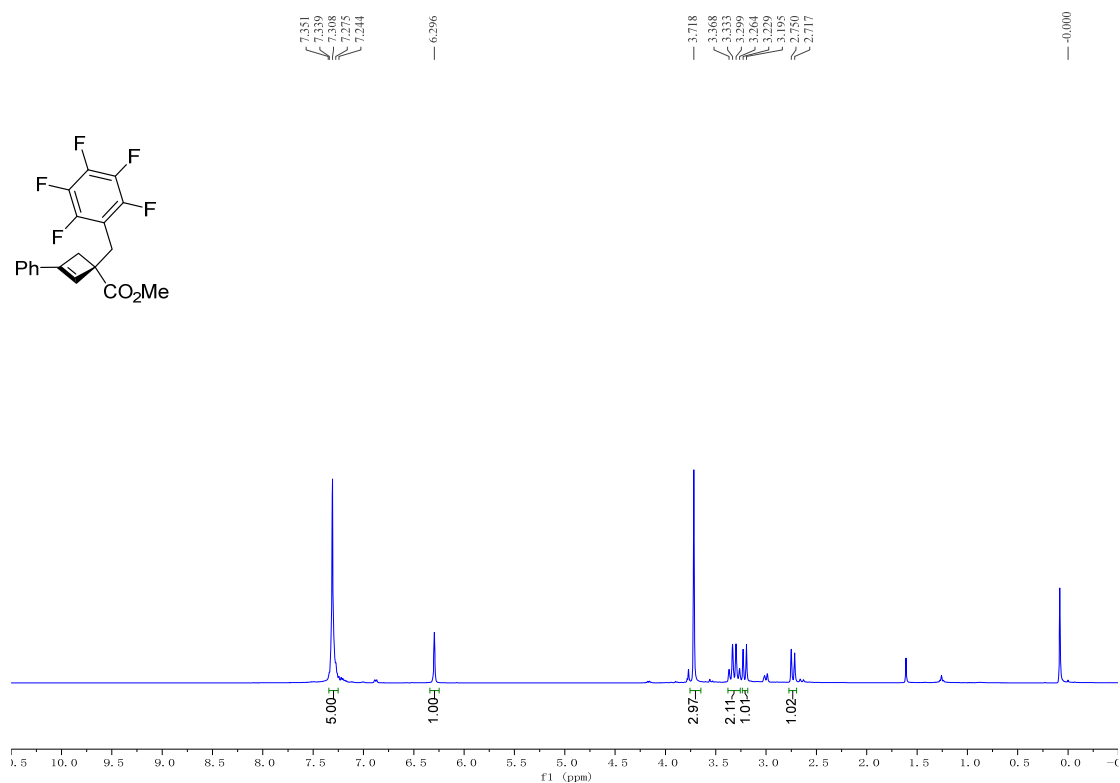 **$^{13}\text{C}$  NMR (100 MHz,  $\text{CDCl}_3$ )**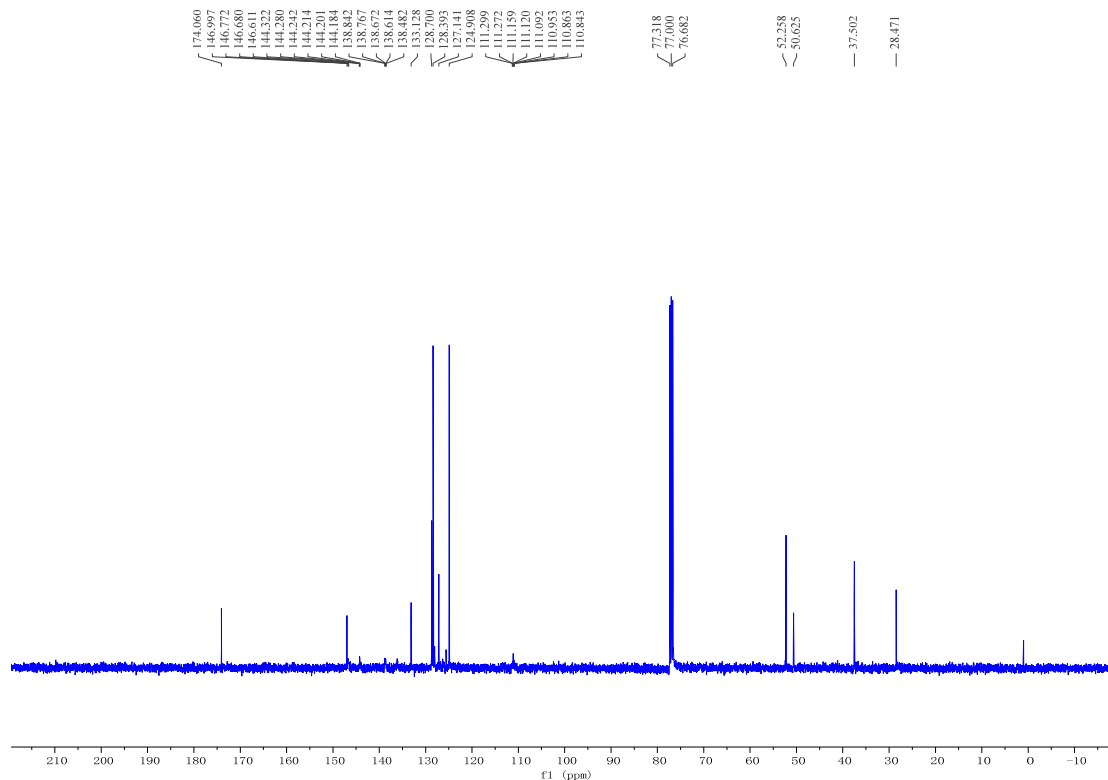

$^{19}\text{F}$  NMR (376 MHz,  $\text{CDCl}_3$ )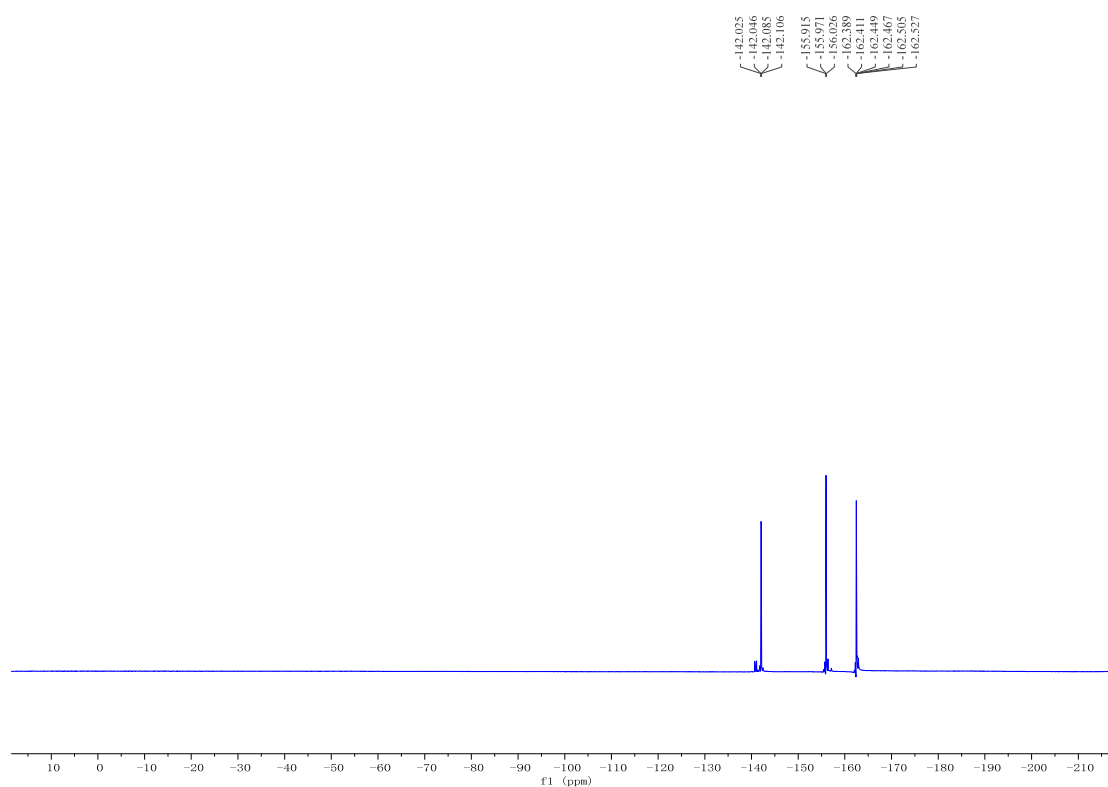 $^1\text{H}$  and  $^{13}\text{C}$  NMR Spectra for Compound 3bj: $^1\text{H}$  NMR (400 MHz,  $\text{CDCl}_3$ )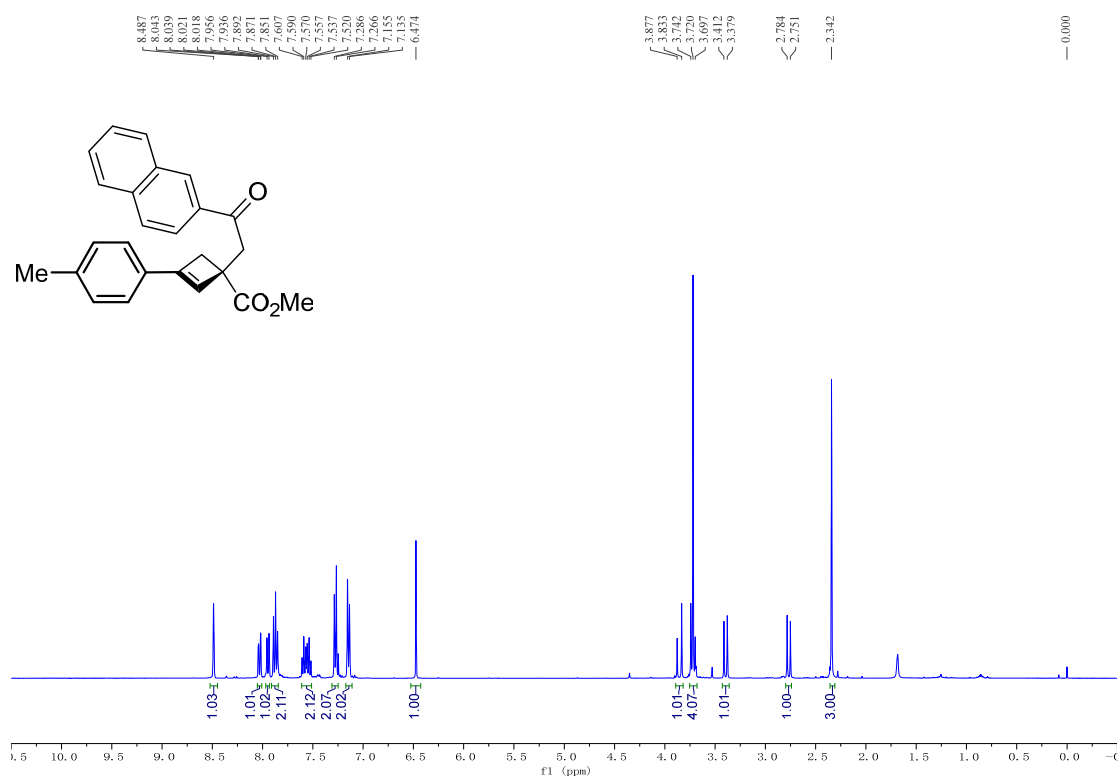

$^{13}\text{C}$  NMR (100 MHz,  $\text{CDCl}_3$ )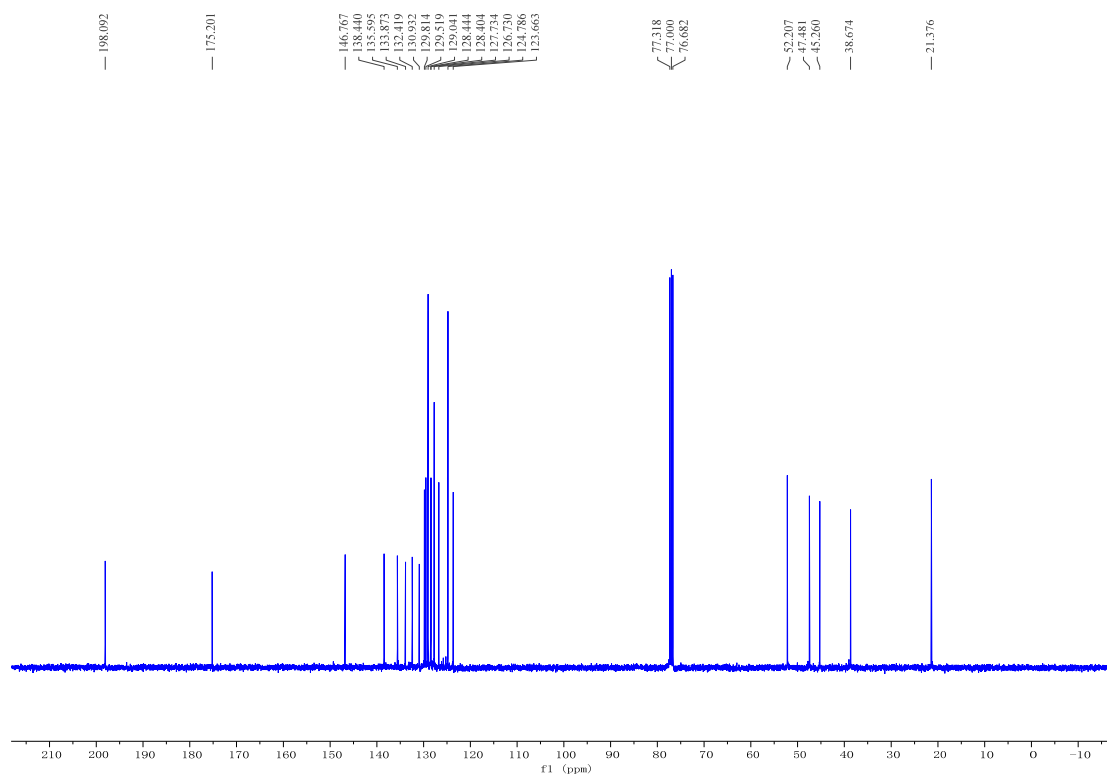 $^1\text{H}$ ,  $^{13}\text{C}$  NMR and  $^{19}\text{F}$  NMR Spectra for Compound 3cj: $^1\text{H}$  NMR (400 MHz,  $\text{CDCl}_3$ )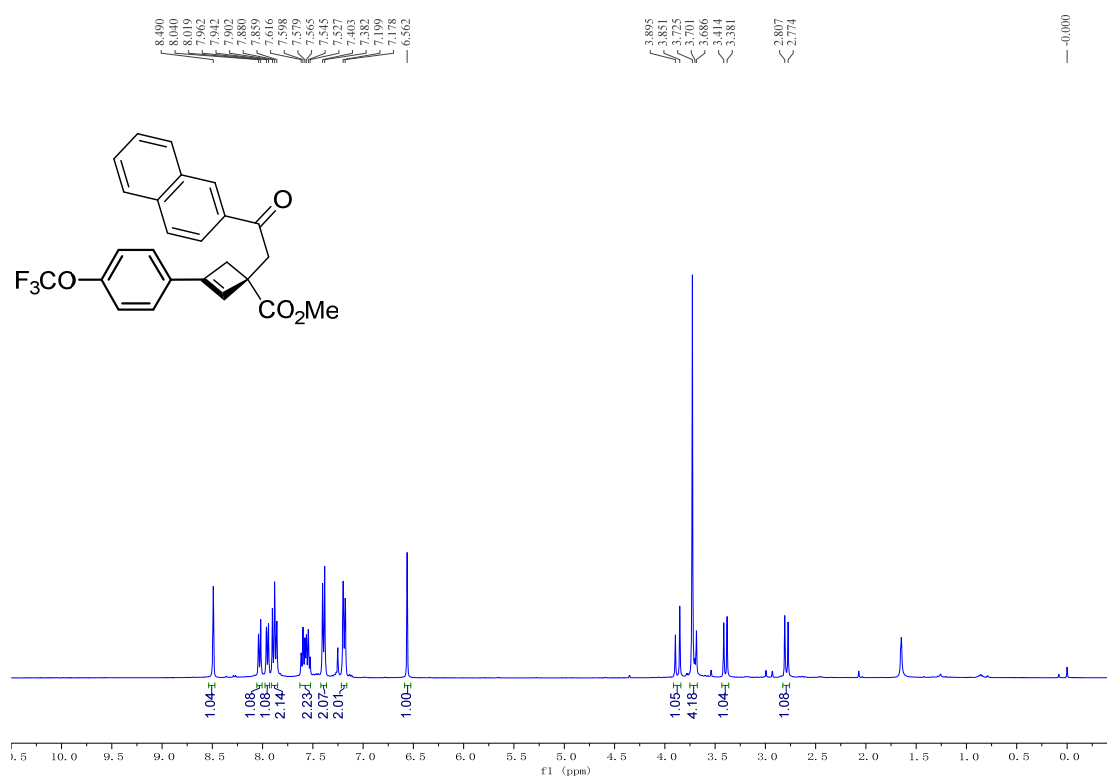

$^{13}\text{C}$  NMR (100 MHz,  $\text{CDCl}_3$ )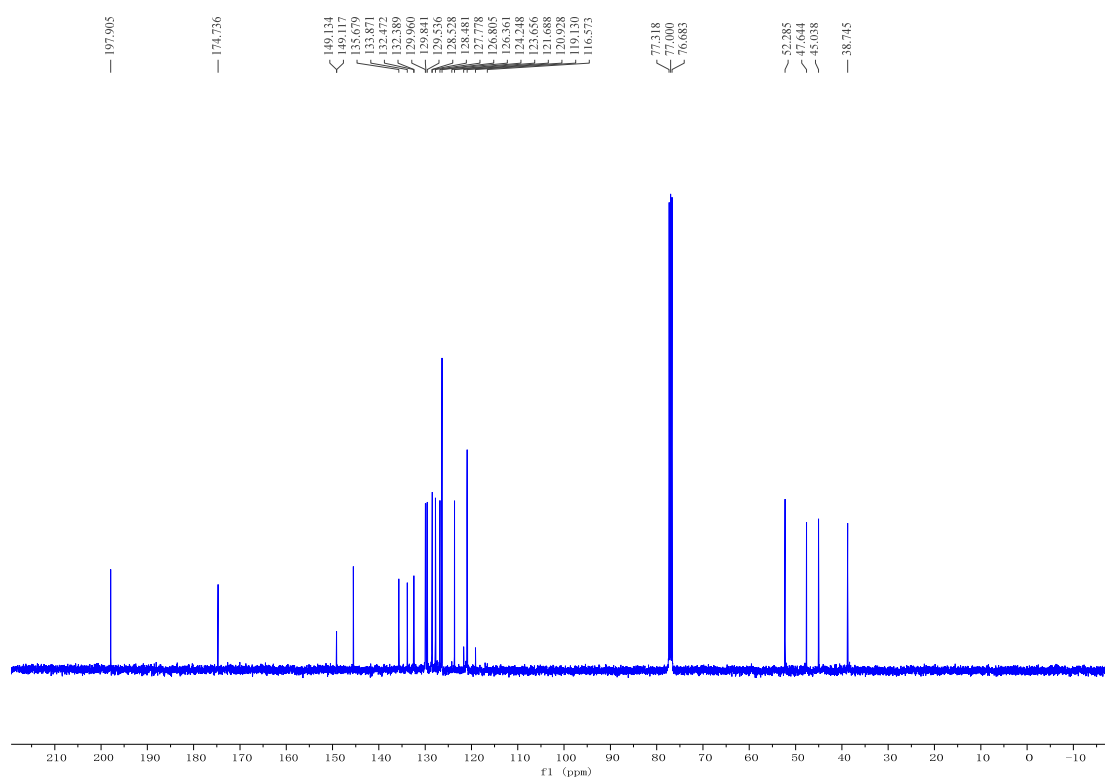 $^{19}\text{F}$  NMR (376 MHz,  $\text{CDCl}_3$ )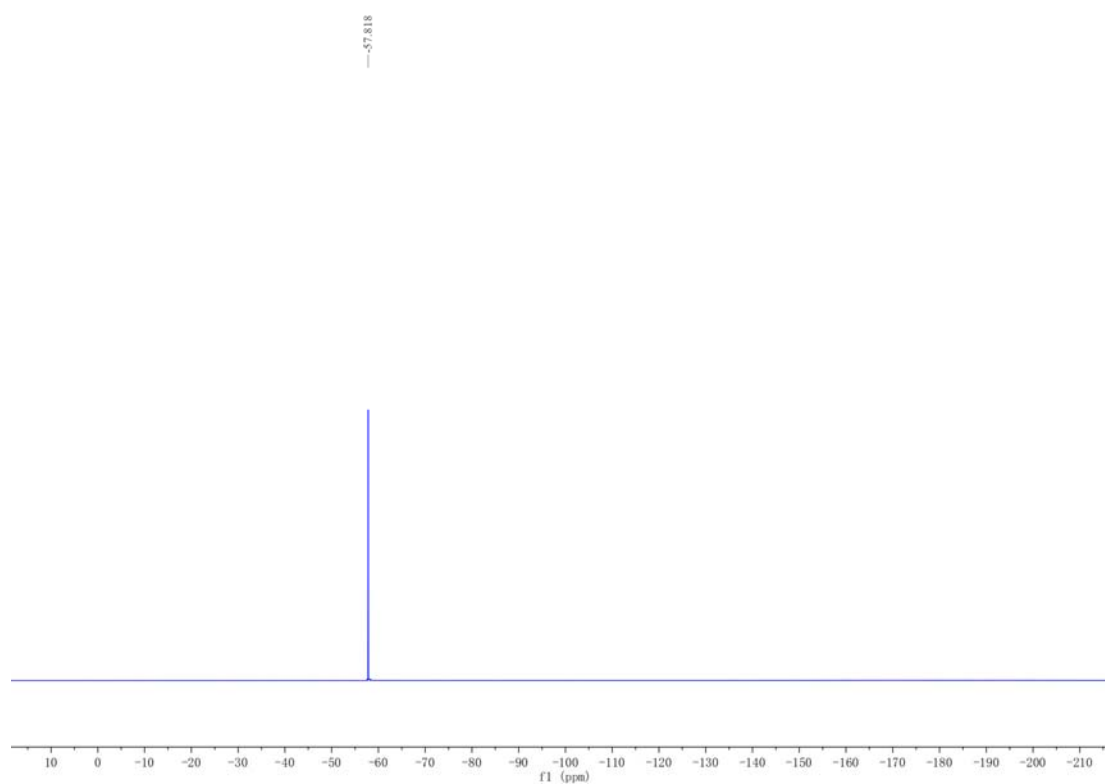

**$^1\text{H}$  and  $^{13}\text{C}$  NMR Spectra for Compound 3dj:** **$^1\text{H}$  NMR (400 MHz,  $\text{CDCl}_3$ )**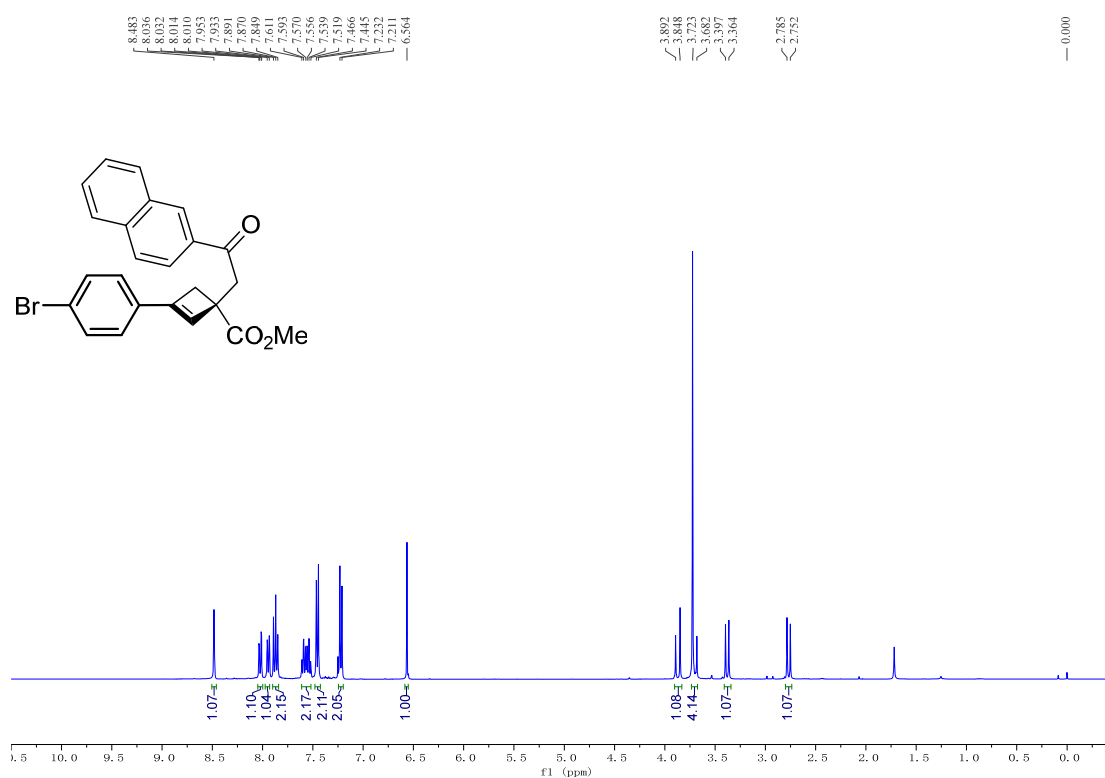 **$^{13}\text{C}$  NMR (100 MHz,  $\text{CDCl}_3$ )**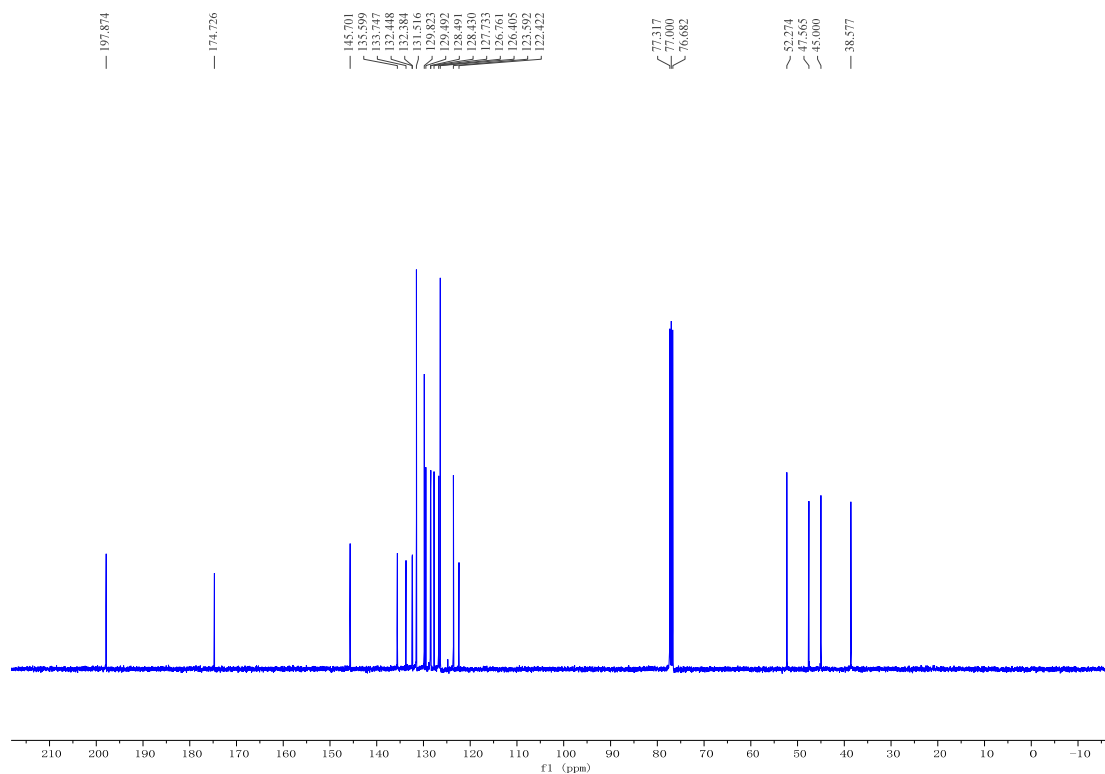

**$^1\text{H}$ ,  $^{13}\text{C}$  NMR and  $^{19}\text{F}$  NMR Spectra for Compound 3ej:** **$^1\text{H}$  NMR (400 MHz,  $\text{CDCl}_3$ )**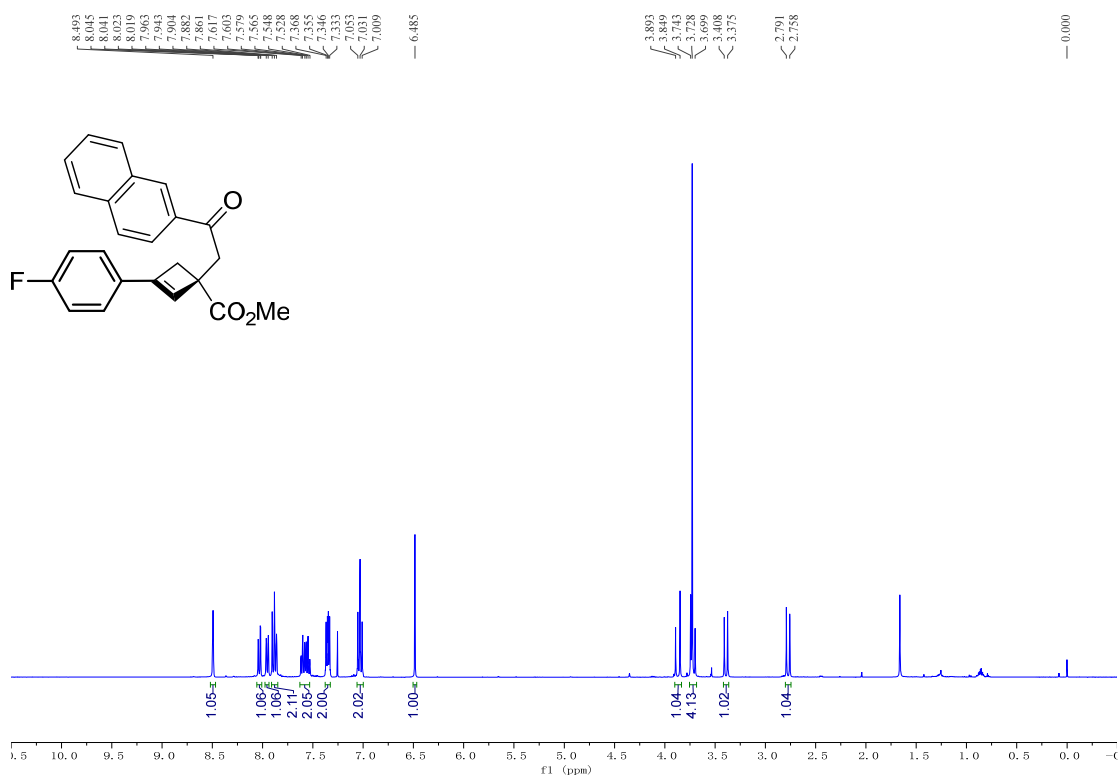 **$^{13}\text{C}$  NMR (100 MHz,  $\text{CDCl}_3$ )**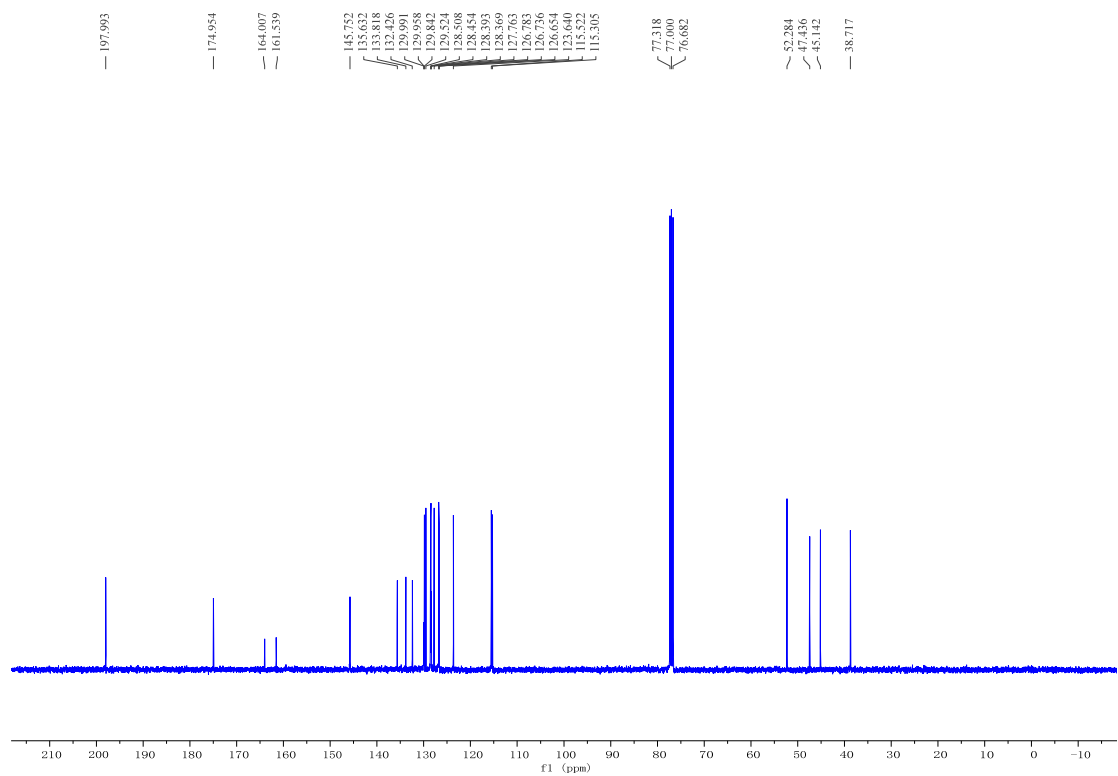



$^{19}\text{F}$  NMR (376 MHz,  $\text{CDCl}_3$ )

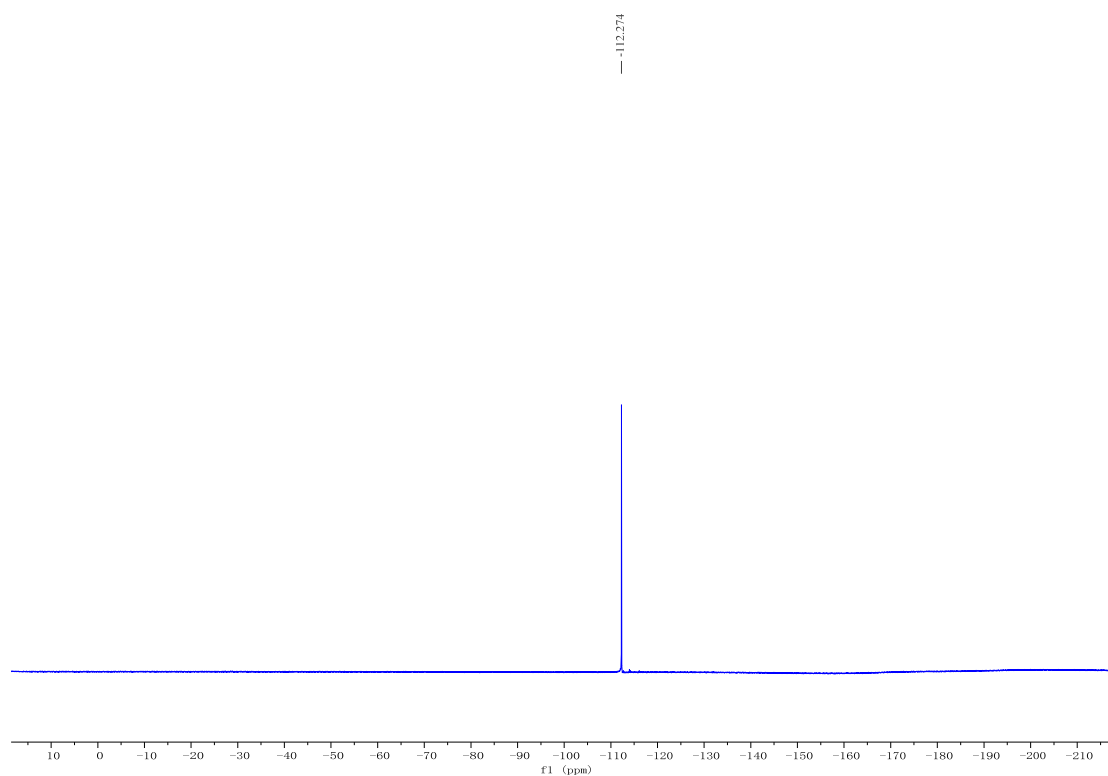

$^1\text{H}$  and  $^{13}\text{C}$  NMR Spectra for Compound 3fj:

$^1\text{H}$  NMR (400 MHz,  $\text{CDCl}_3$ )

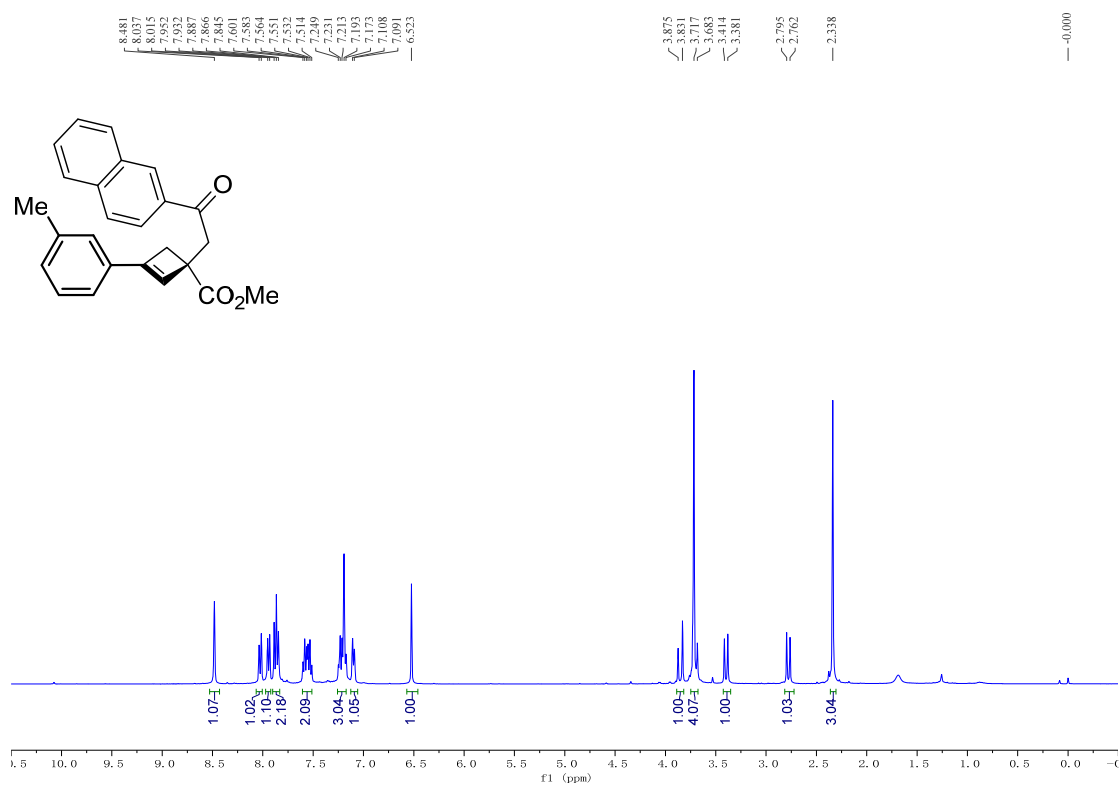

$^{13}\text{C}$  NMR (100 MHz,  $\text{CDCl}_3$ )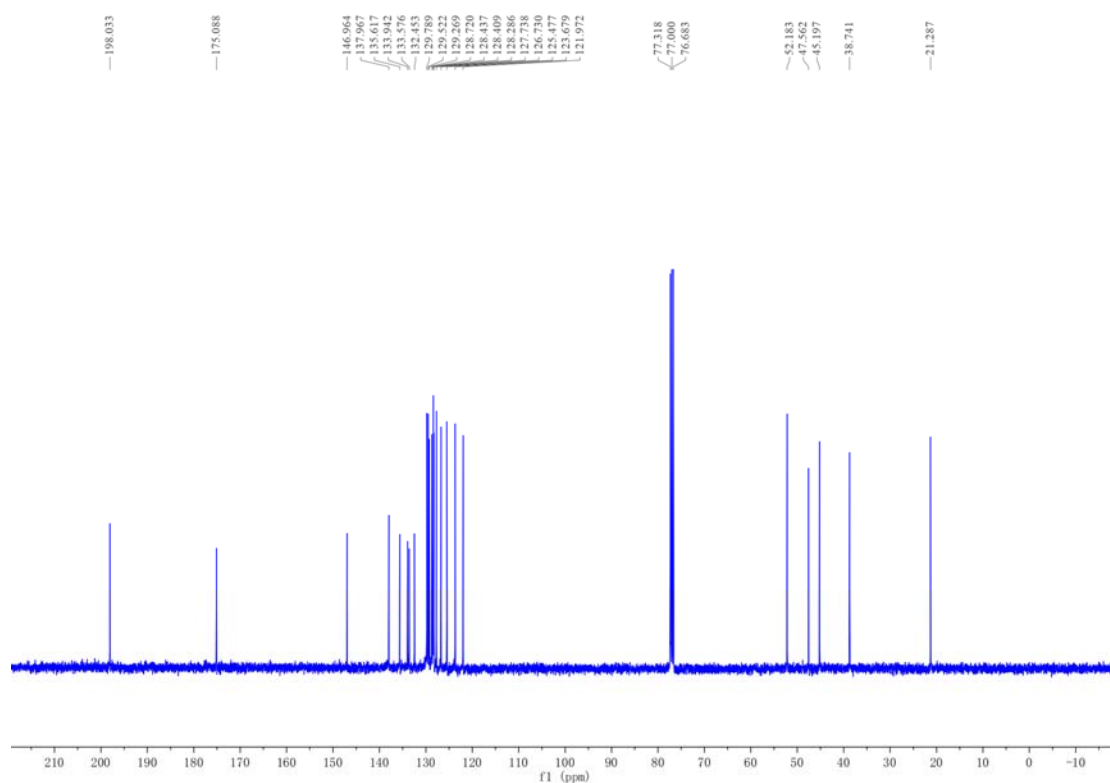 $^1\text{H}$  and  $^{13}\text{C}$  NMR Spectra for Compound 3gj: $^1\text{H}$  NMR (400 MHz,  $\text{CDCl}_3$ )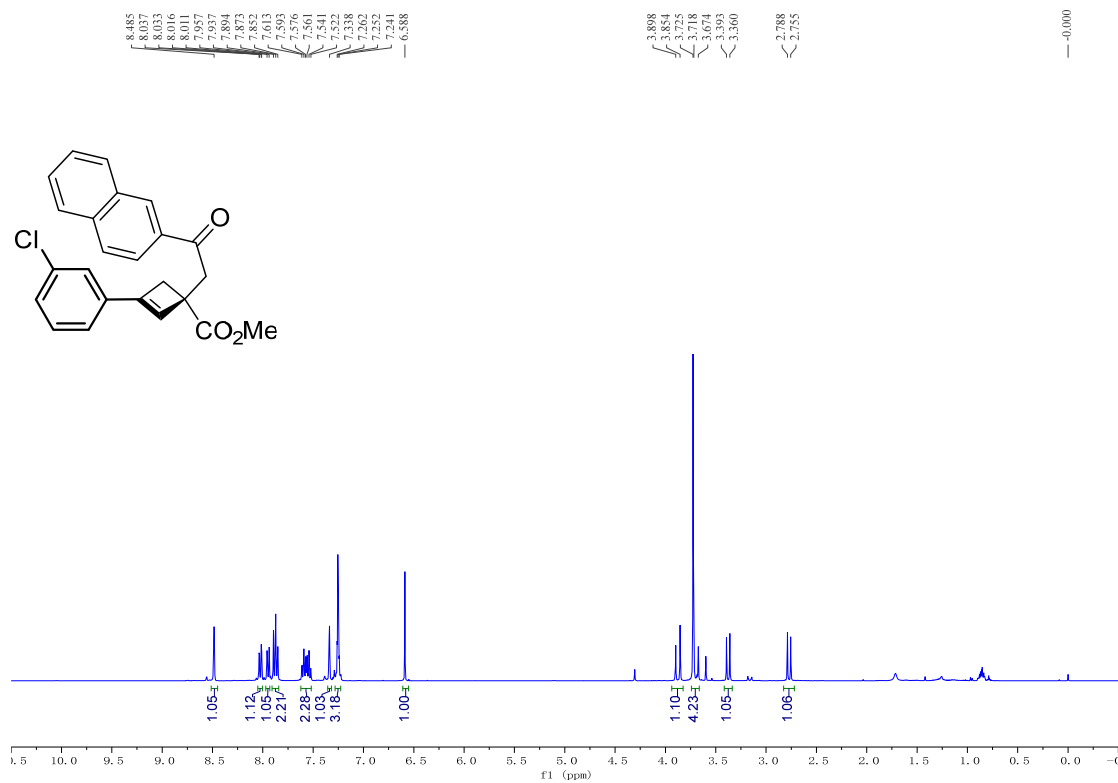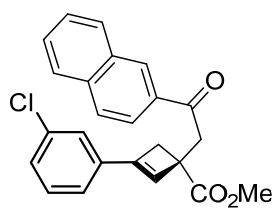

$^{13}\text{C}$  NMR (100 MHz,  $\text{CDCl}_3$ )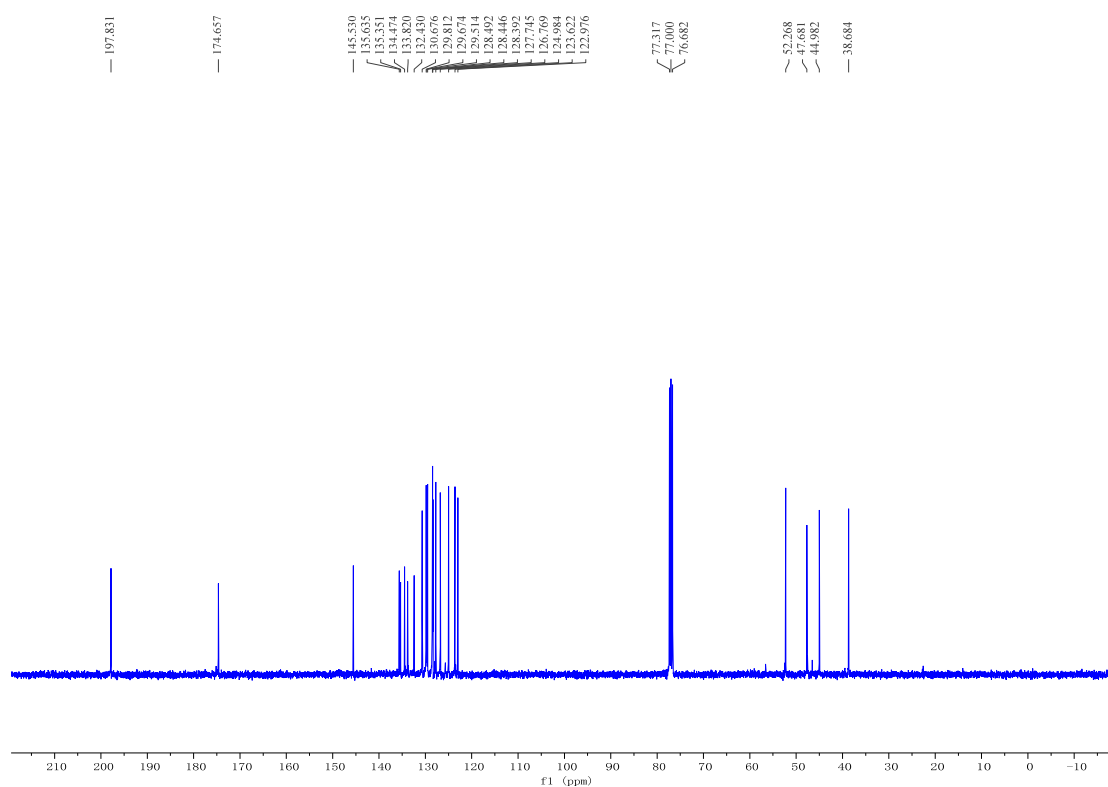 $^1\text{H}$ ,  $^{13}\text{C}$  NMR and  $^{19}\text{F}$  NMR Spectra for Compound 3hj: $^1\text{H}$  NMR (400 MHz,  $\text{CDCl}_3$ )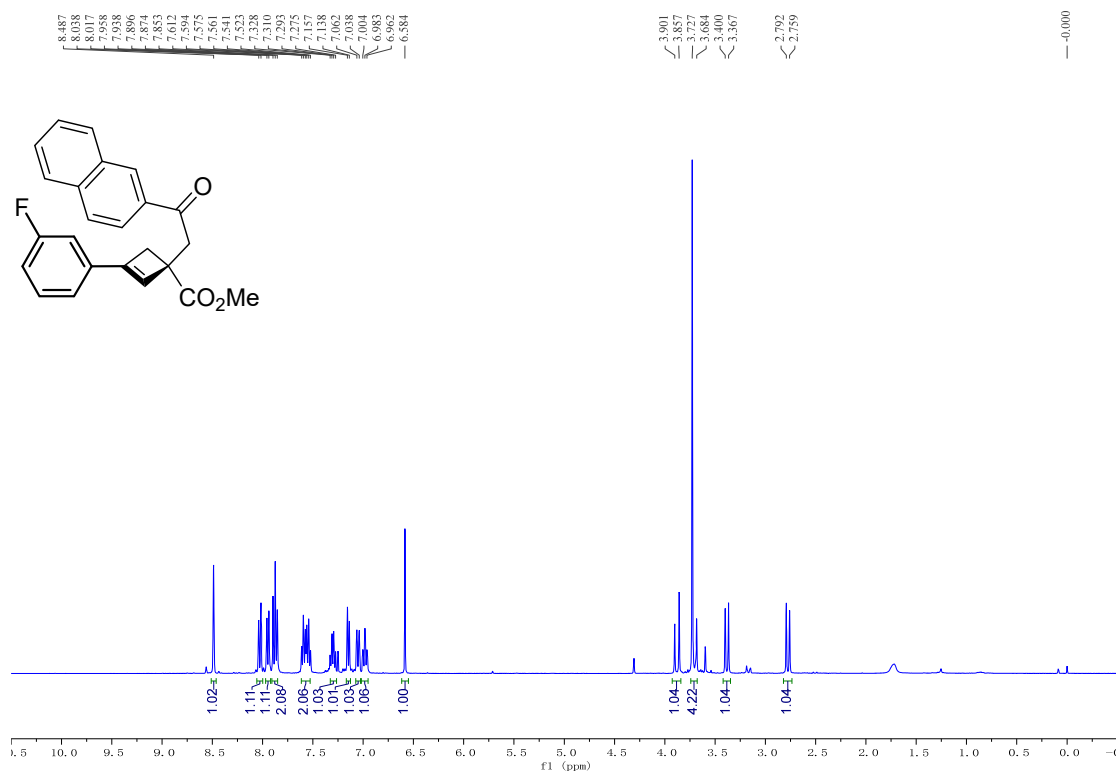

$^{13}\text{C}$  NMR (100 MHz,  $\text{CDCl}_3$ )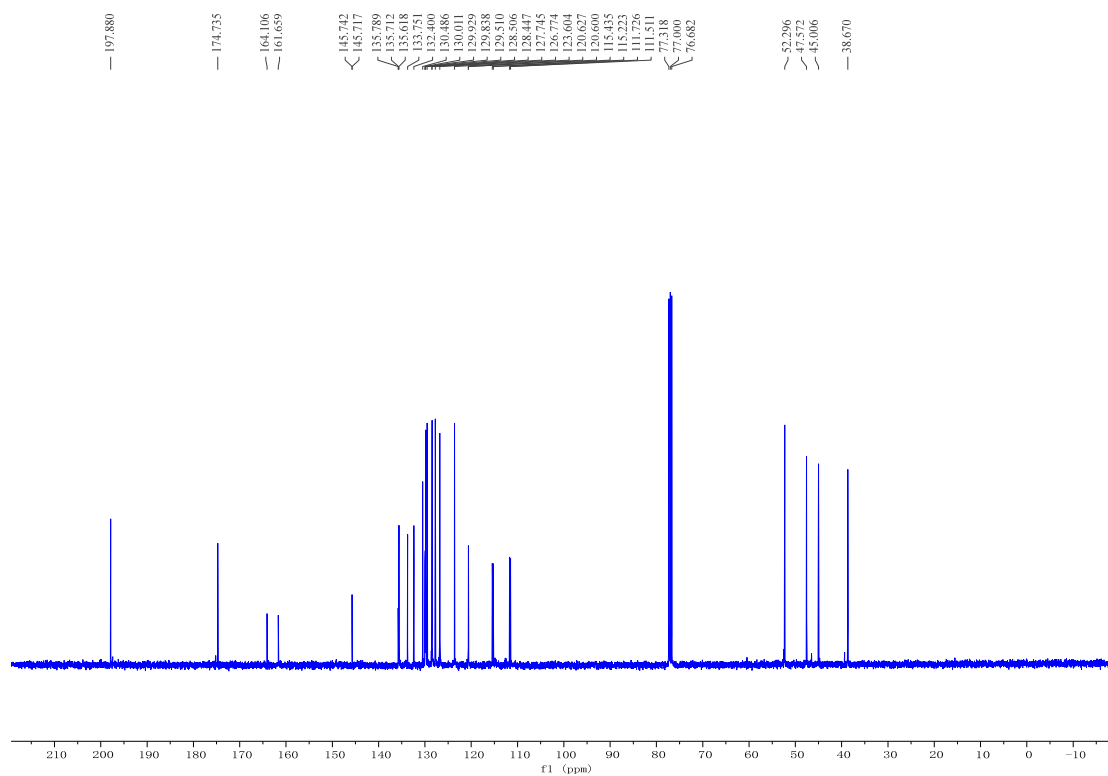 $^{19}\text{F}$  NMR (376 MHz,  $\text{CDCl}_3$ )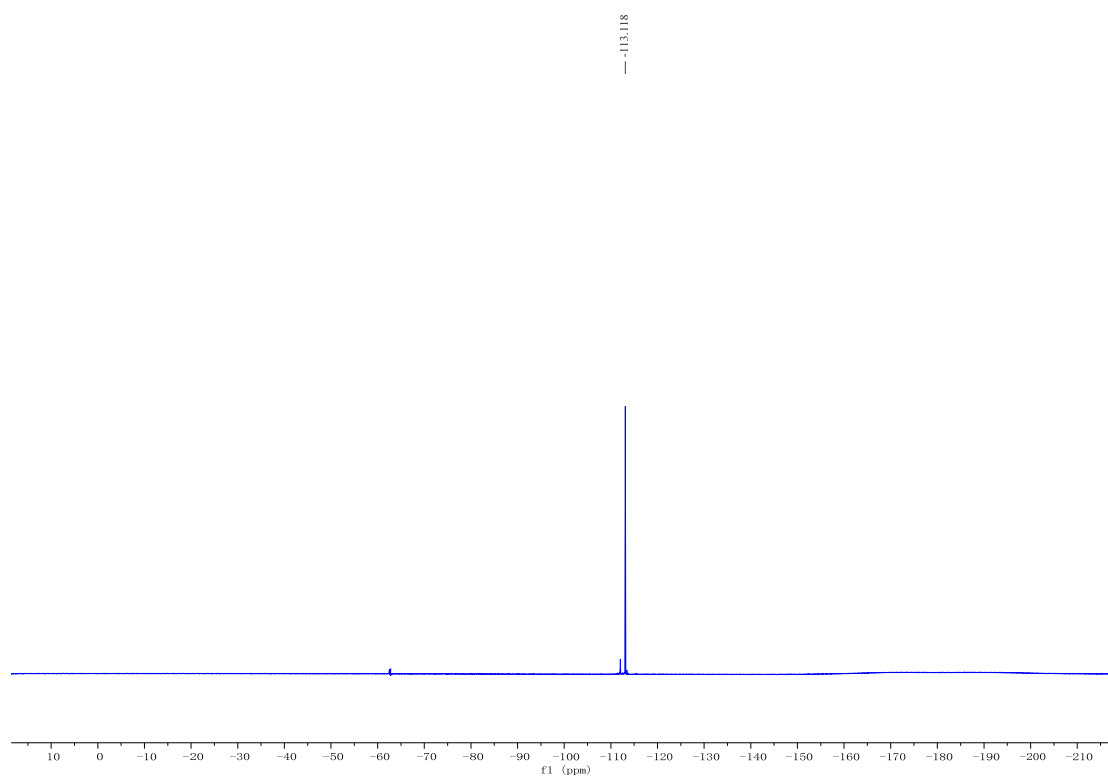

**$^1\text{H}$  and  $^{13}\text{C}$  NMR Spectra for Compound 3ij:** **$^1\text{H}$  NMR (400 MHz,  $\text{CDCl}_3$ )**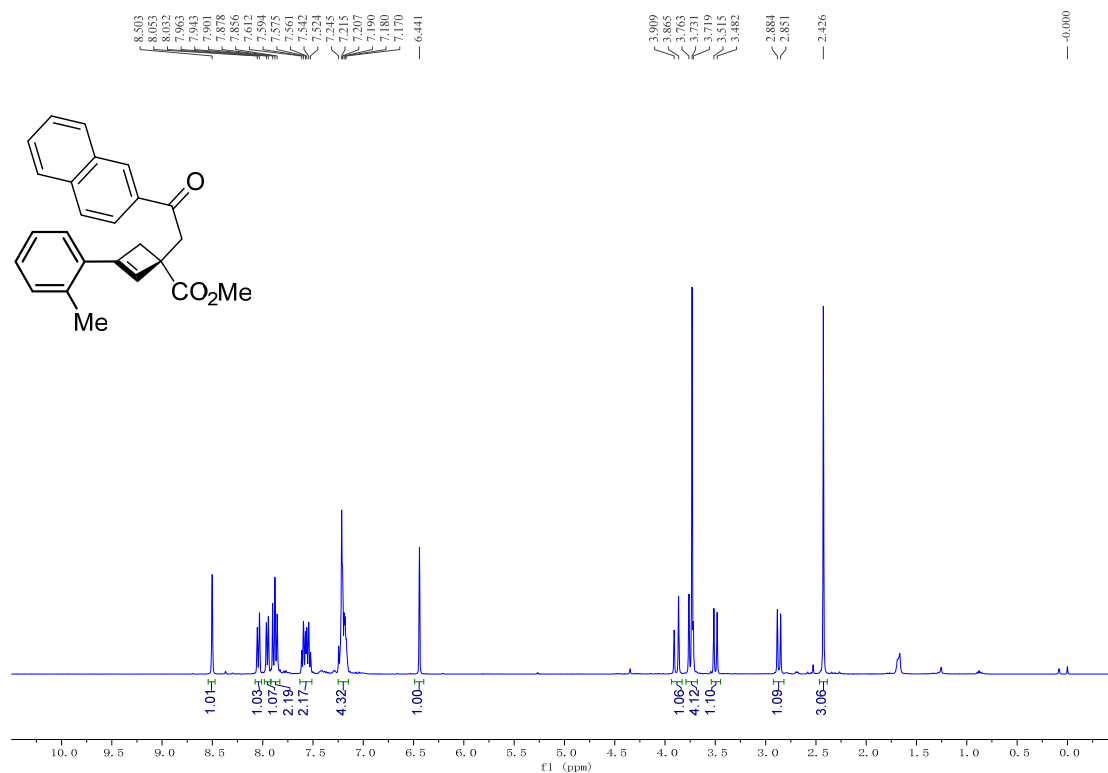 **$^{13}\text{C}$  NMR (100 MHz,  $\text{CDCl}_3$ )**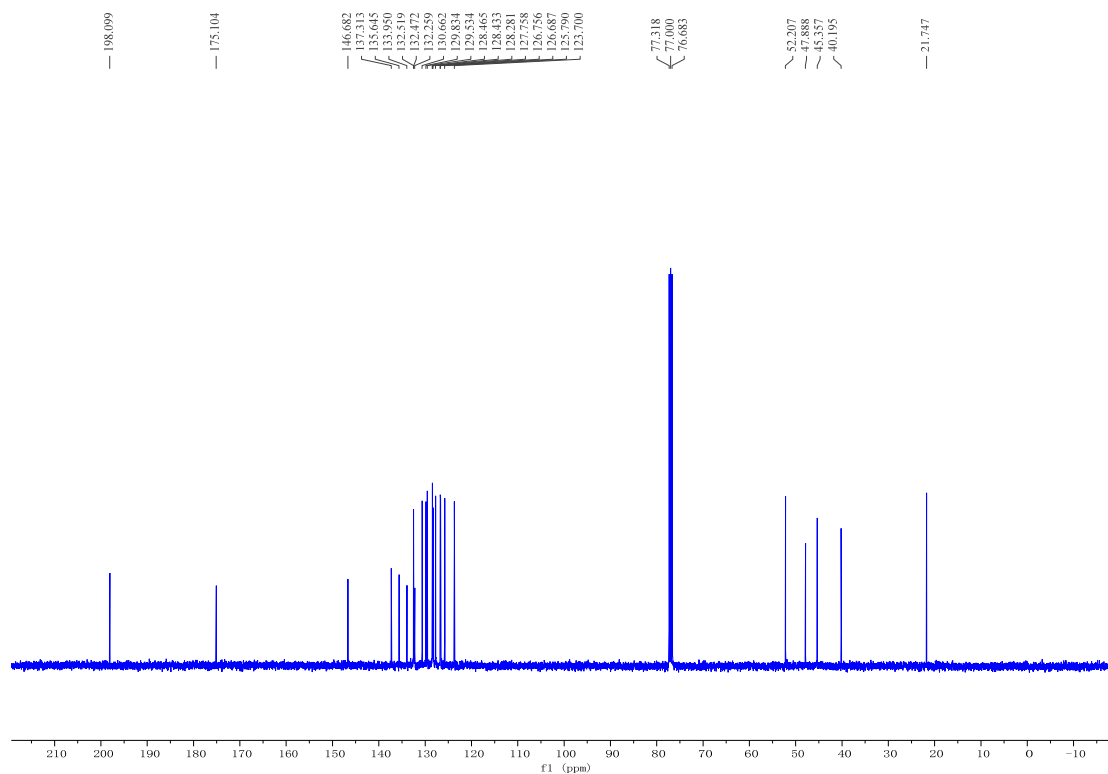

**$^1\text{H}$  and  $^{13}\text{C}$  NMR Spectra for Compound 3jj:** **$^1\text{H}$  NMR (400 MHz,  $\text{CDCl}_3$ )**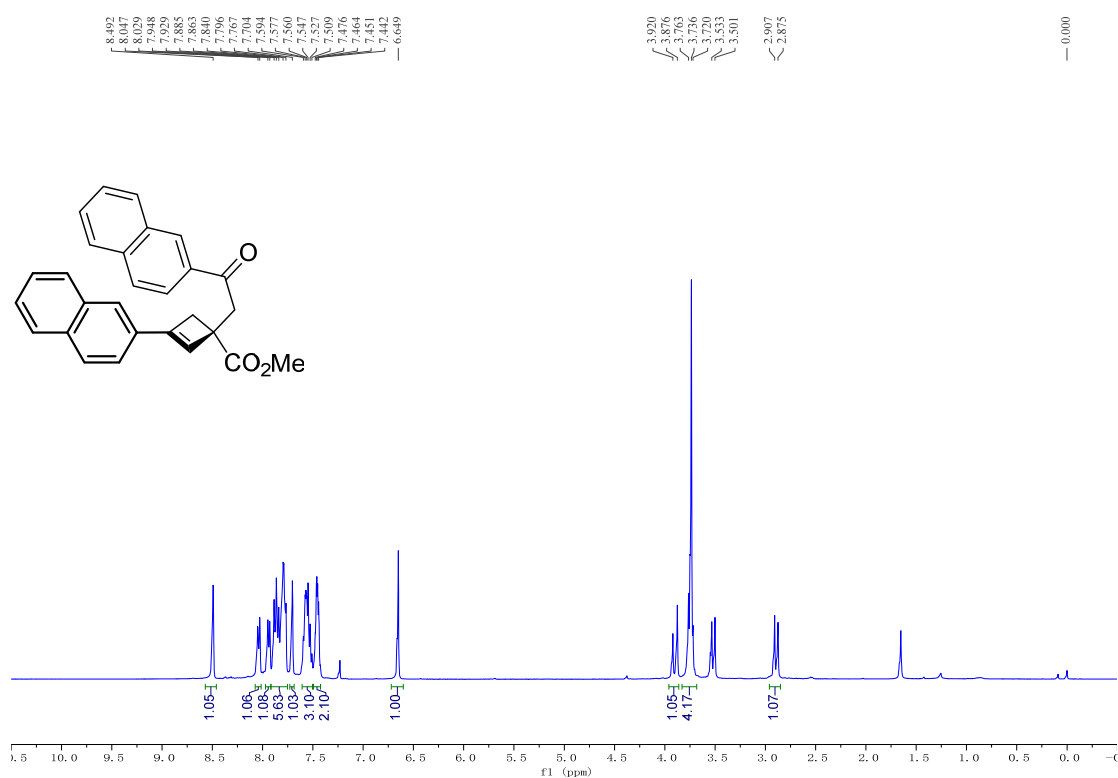 **$^{13}\text{C}$  NMR (100 MHz,  $\text{CDCl}_3$ )**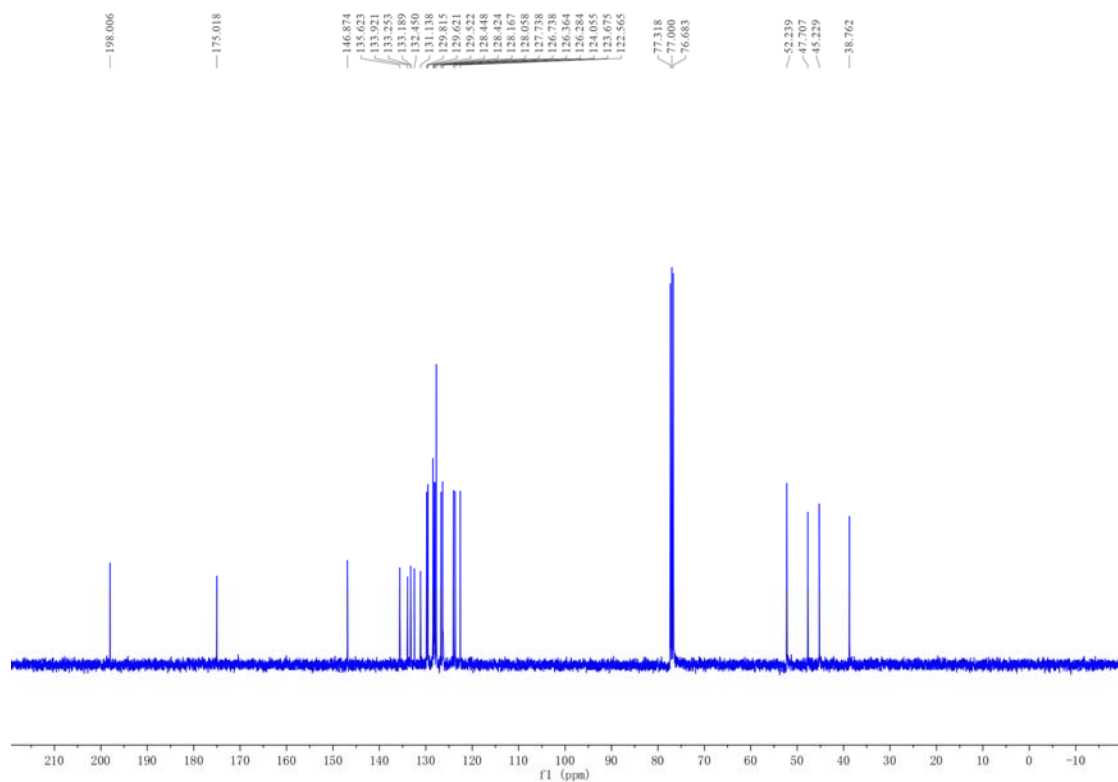

**$^1\text{H}$  and  $^{13}\text{C}$  NMR Spectra for Compound 3ks:** $^1\text{H}$  NMR (400 MHz,  $\text{CDCl}_3$ )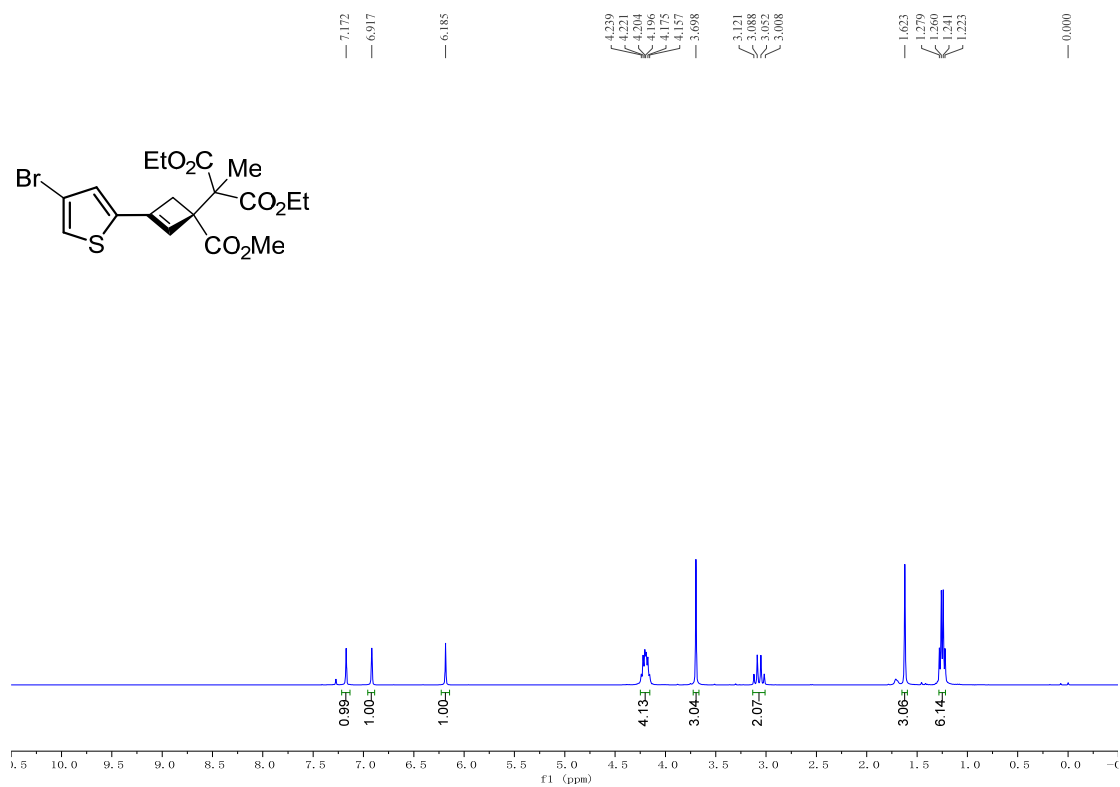 $^{13}\text{C}$  NMR (100 MHz,  $\text{CDCl}_3$ )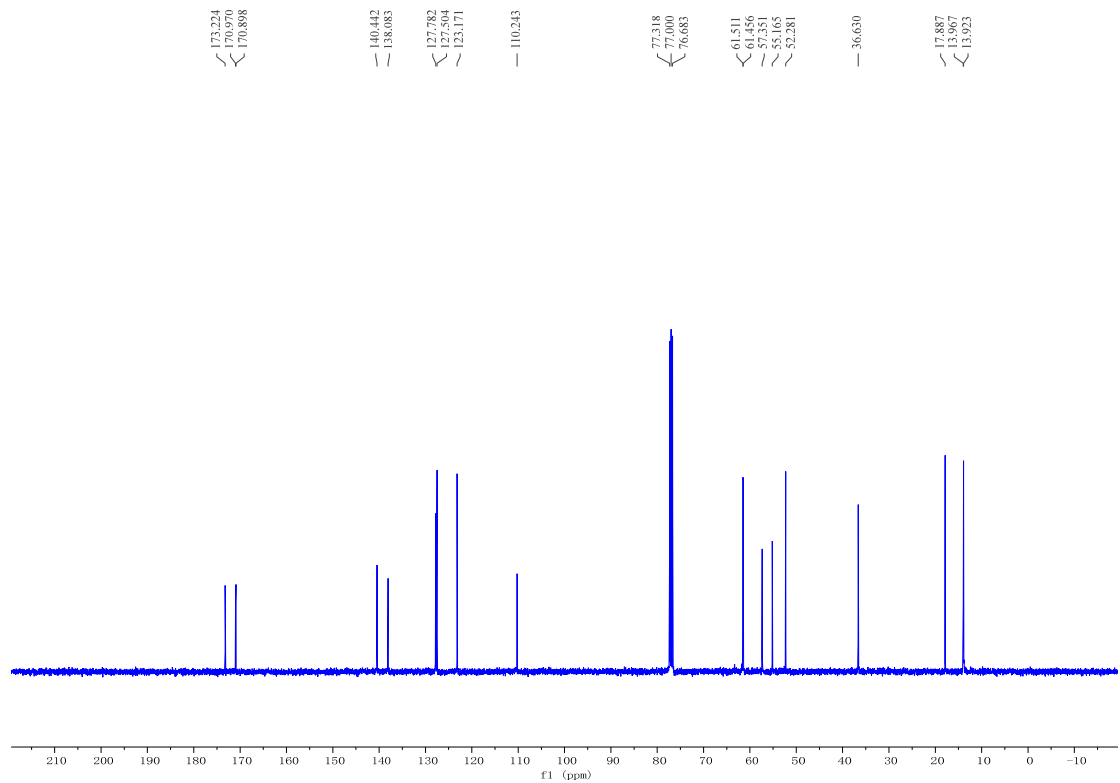

**$^1\text{H}$ ,  $^{13}\text{C}$  NMR and  $^{19}\text{F}$  NMR Spectra for Compound 3bu:** **$^1\text{H}$  NMR (400 MHz,  $\text{CDCl}_3$ )**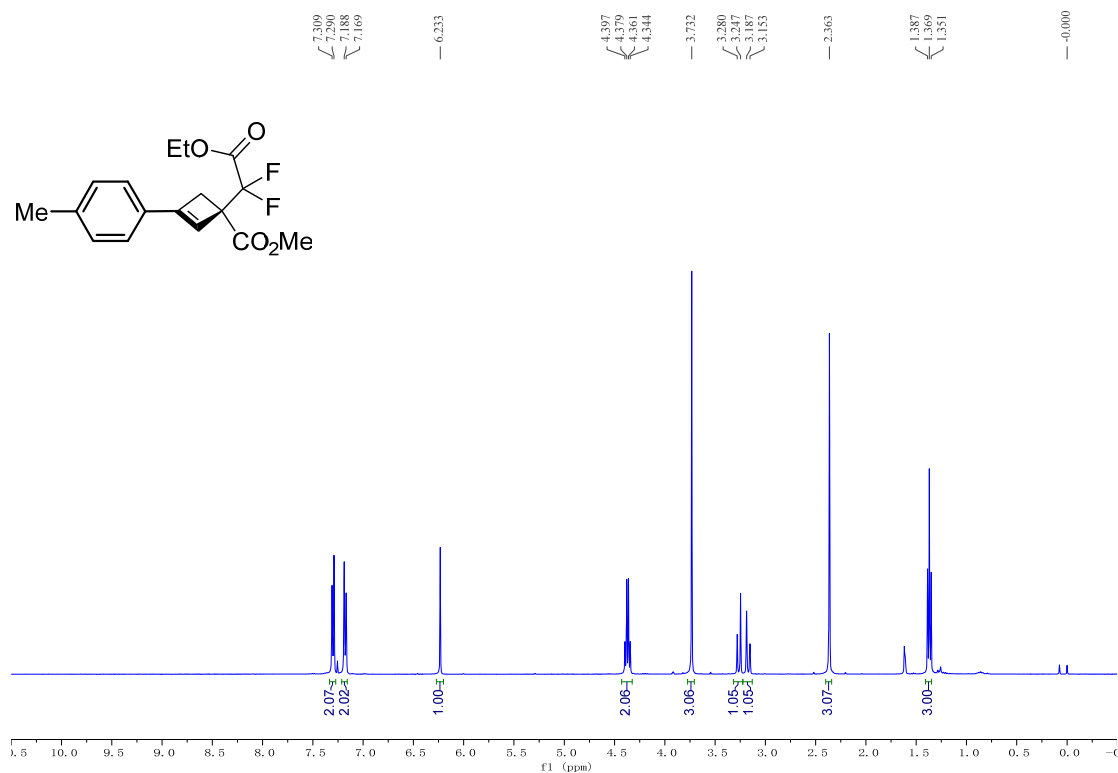 **$^{13}\text{C}$  NMR (100 MHz,  $\text{CDCl}_3$ )**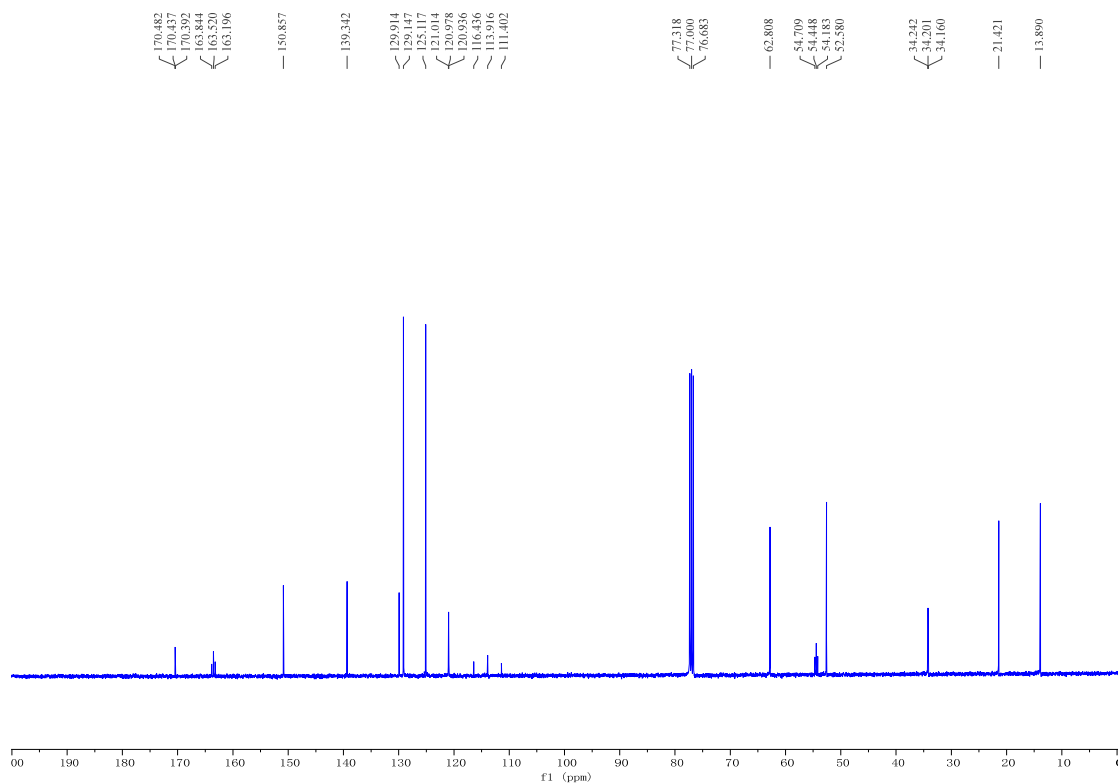



$^{19}\text{F}$  NMR (376 MHz,  $\text{CDCl}_3$ )

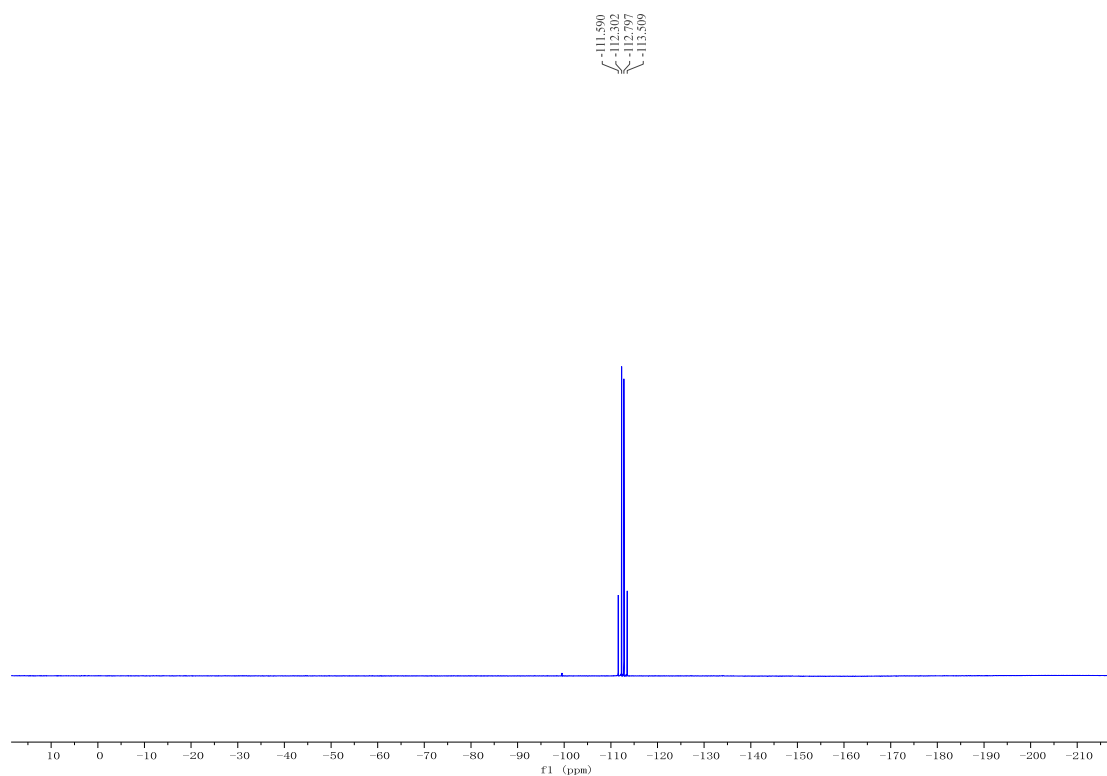

$^1\text{H}$ ,  $^{13}\text{C}$  NMR and  $^{19}\text{F}$  NMR Spectra for Compound 3lu:

$^1\text{H}$  NMR (400 MHz,  $\text{CDCl}_3$ )

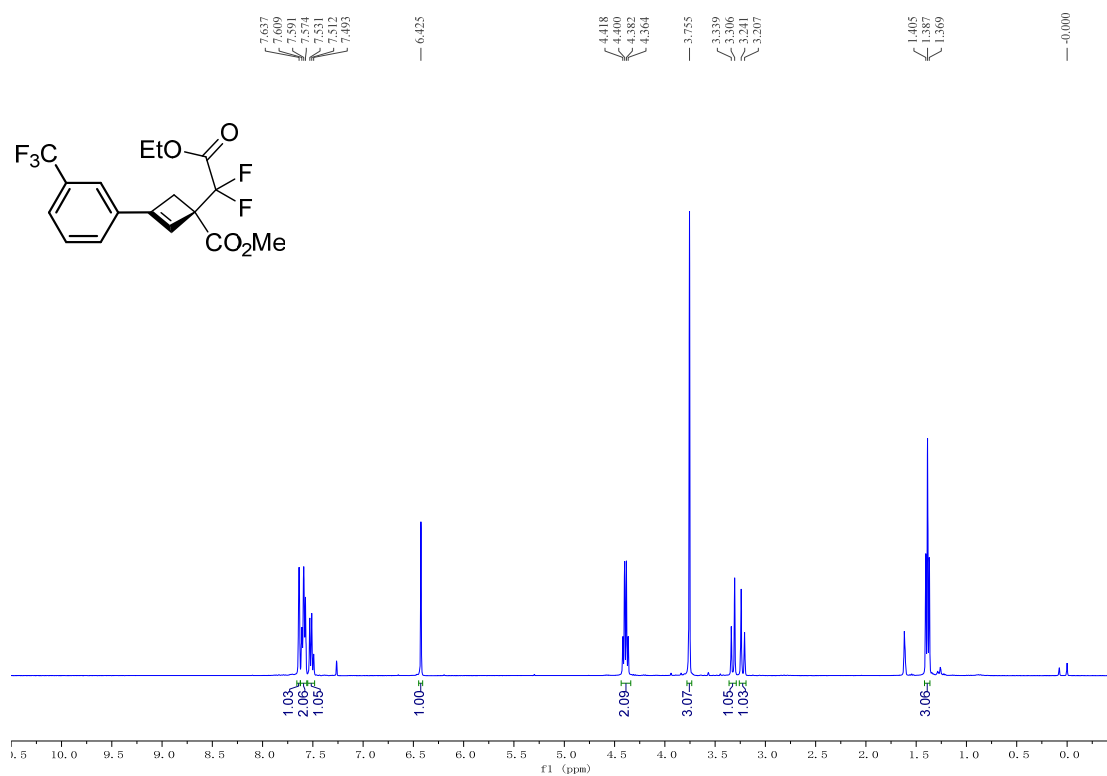

$^{13}\text{C}$  NMR (100 MHz,  $\text{CDCl}_3$ )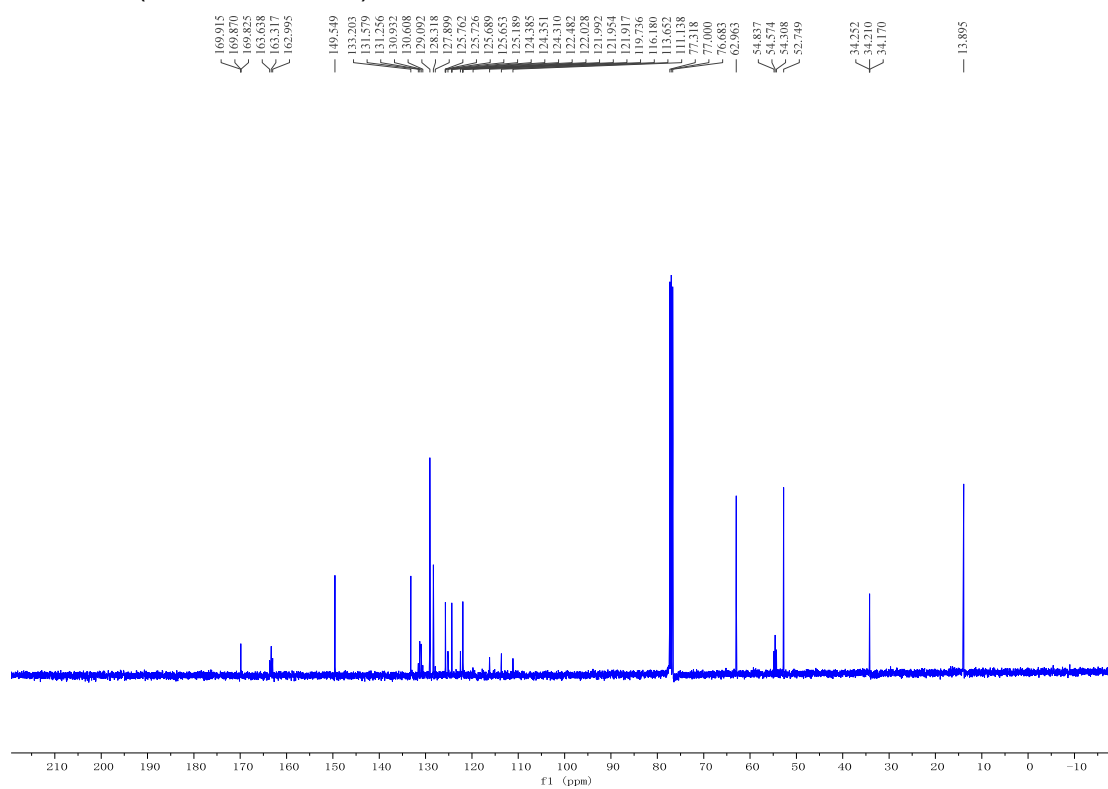 $^{19}\text{F}$  NMR (376 MHz,  $\text{CDCl}_3$ )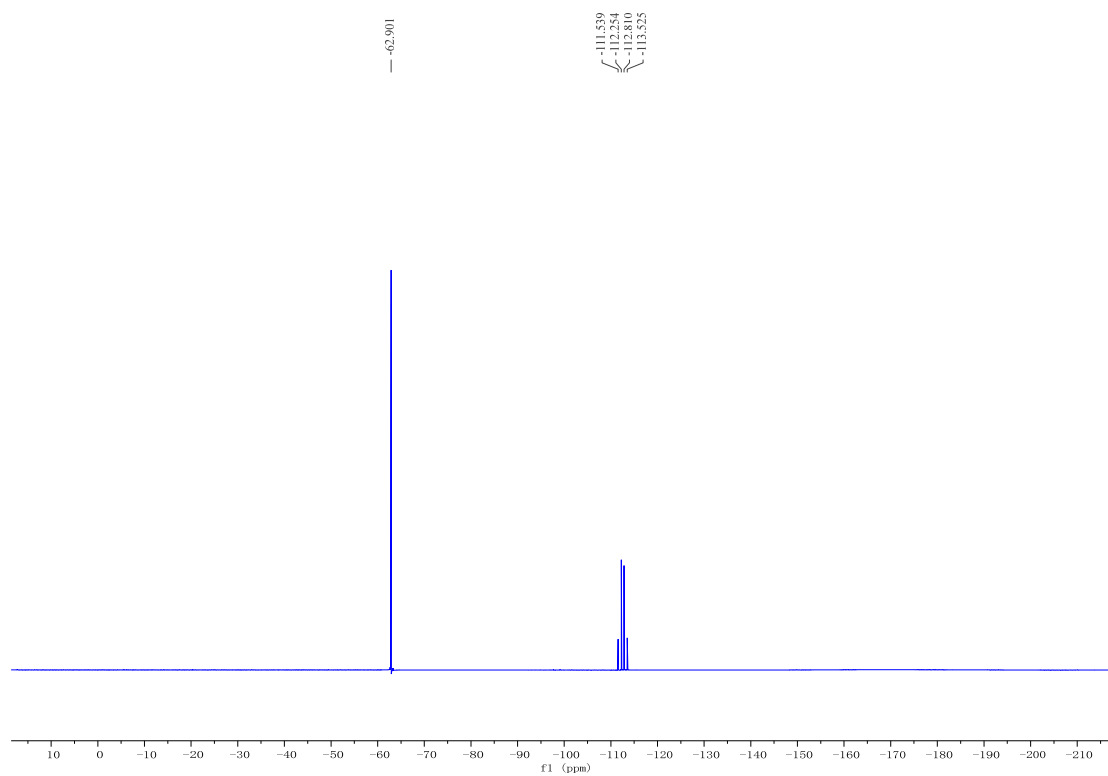

**$^1\text{H}$ ,  $^{13}\text{C}$  NMR and  $^{19}\text{F}$  NMR Spectra for Compound 3mu:** **$^1\text{H}$  NMR (400 MHz,  $\text{CDCl}_3$ )**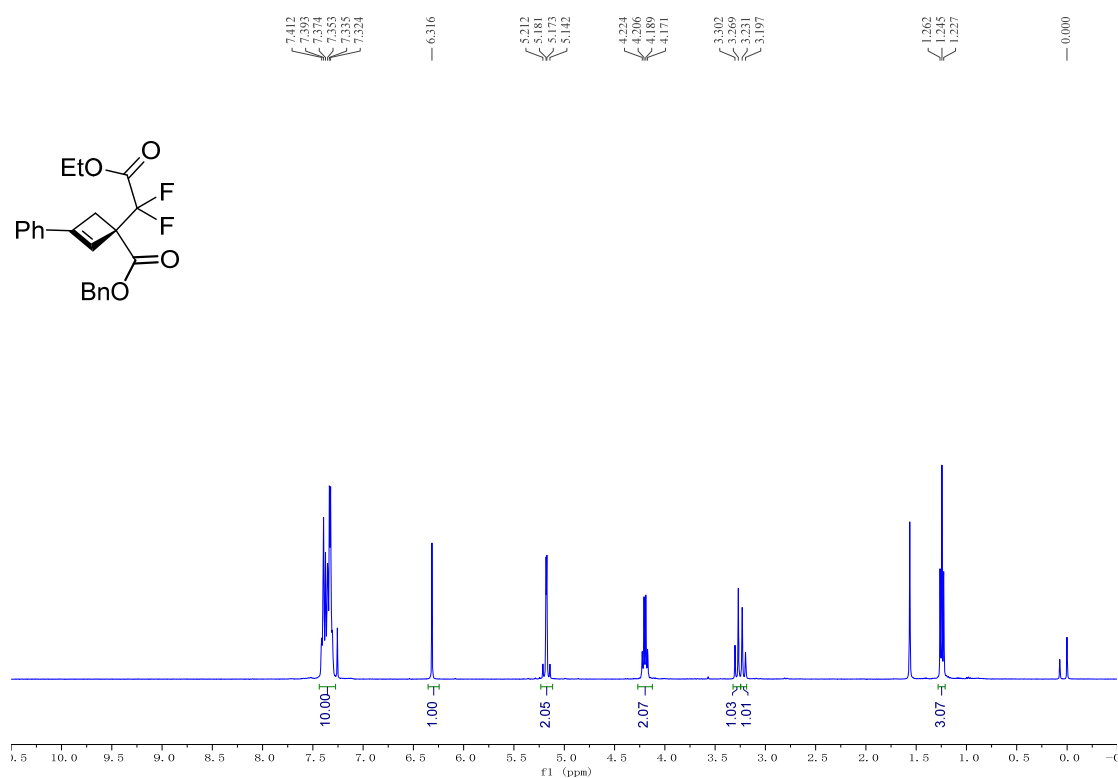 **$^{13}\text{C}$  NMR (100 MHz,  $\text{CDCl}_3$ )**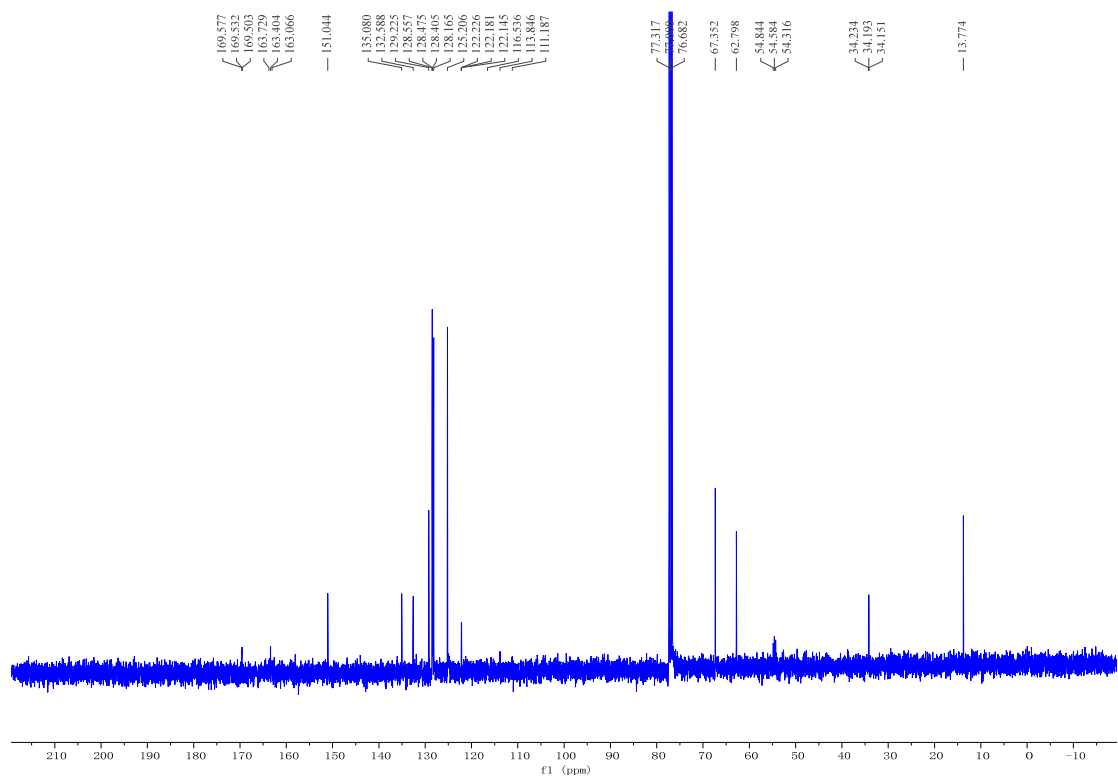

$^{19}\text{F}$ NMR (376 MHz,  $\text{CDCl}_3$ )

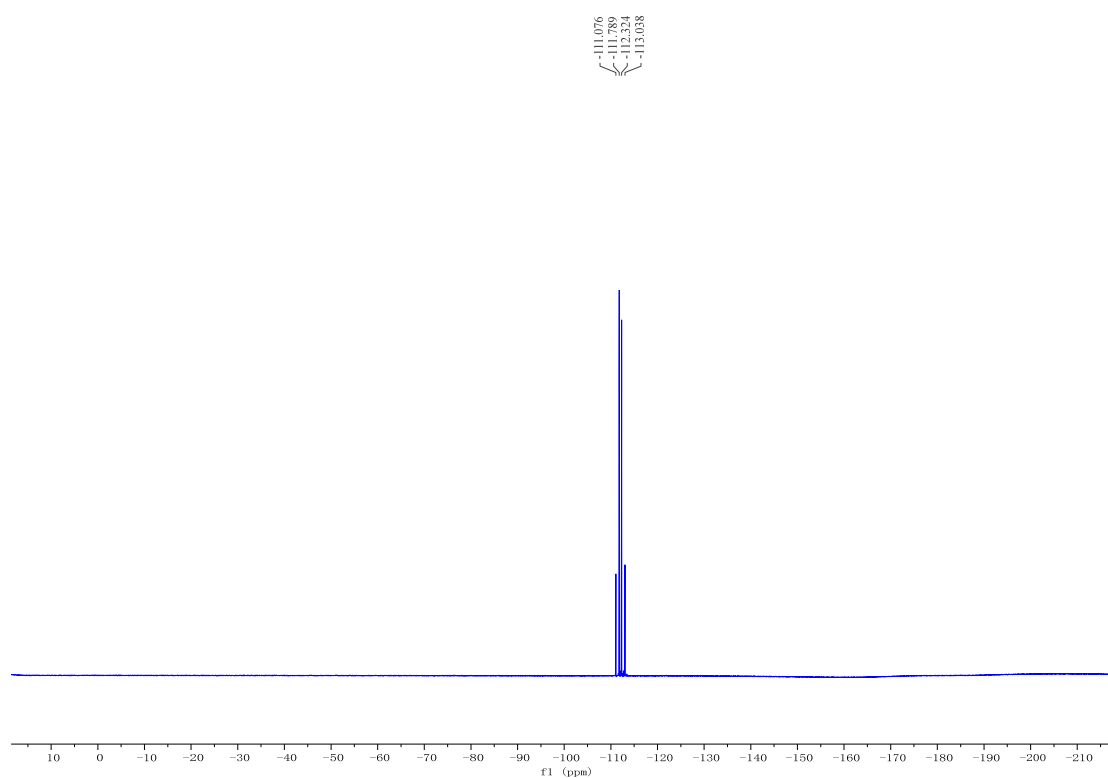

$^1\text{H}$ ,  $^{13}\text{C}$  NMR and  $^{19}\text{F}$  NMR Spectra for Compound 3nu:

$^1\text{H}$  NMR (400 MHz,  $\text{CDCl}_3$ )

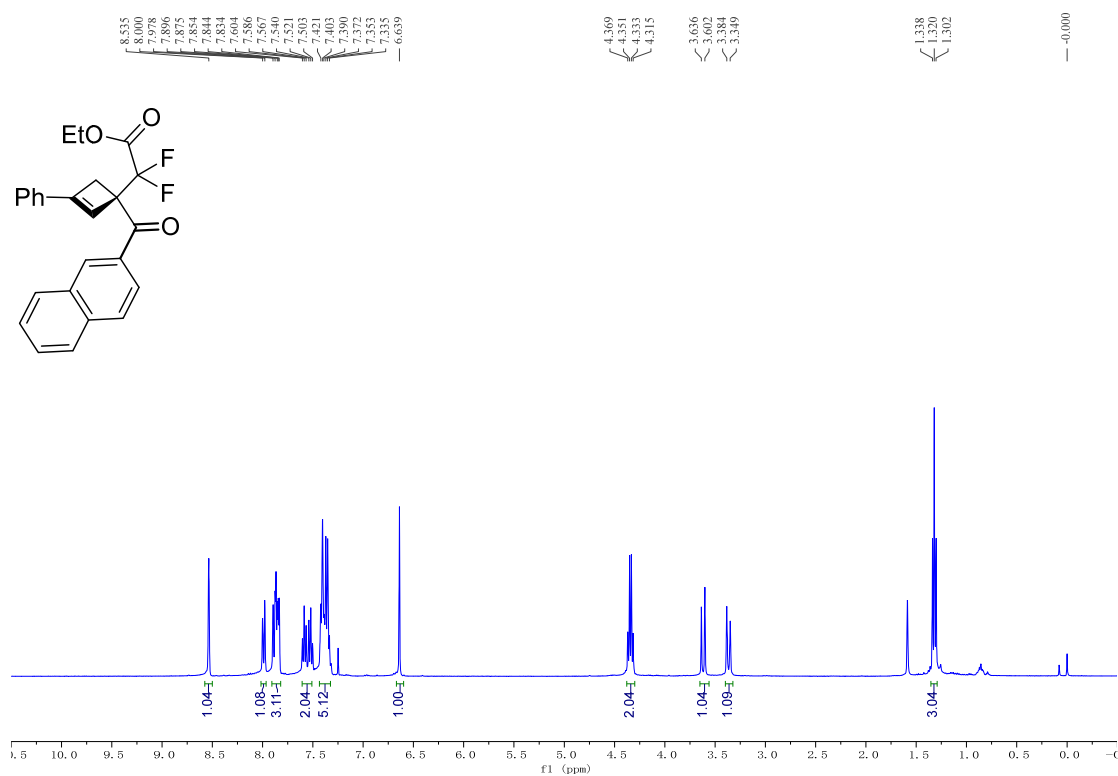

$^{13}\text{C}$  NMR (100 MHz,  $\text{CDCl}_3$ )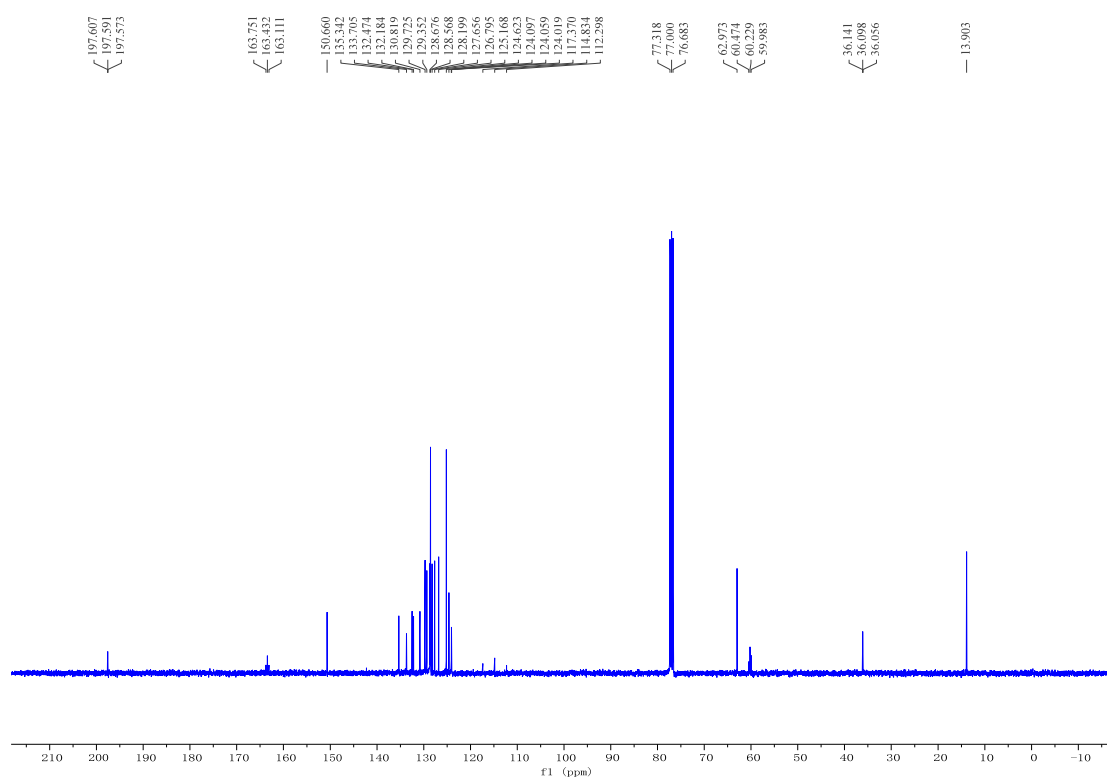 $^{19}\text{F}$  NMR (376 MHz,  $\text{CDCl}_3$ )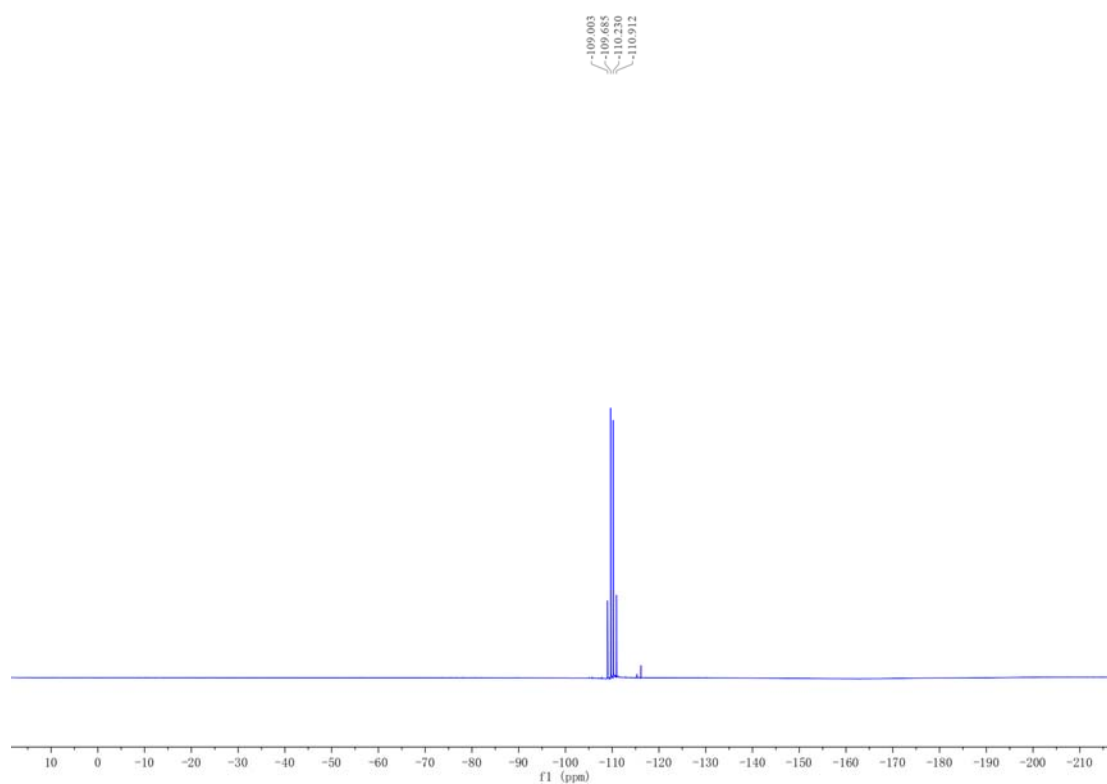

**$^1\text{H}$ ,  $^{13}\text{C}$  NMR and  $^{19}\text{F}$  NMR Spectra for Compound 3ou:** **$^1\text{H}$  NMR (400 MHz,  $\text{CDCl}_3$ )**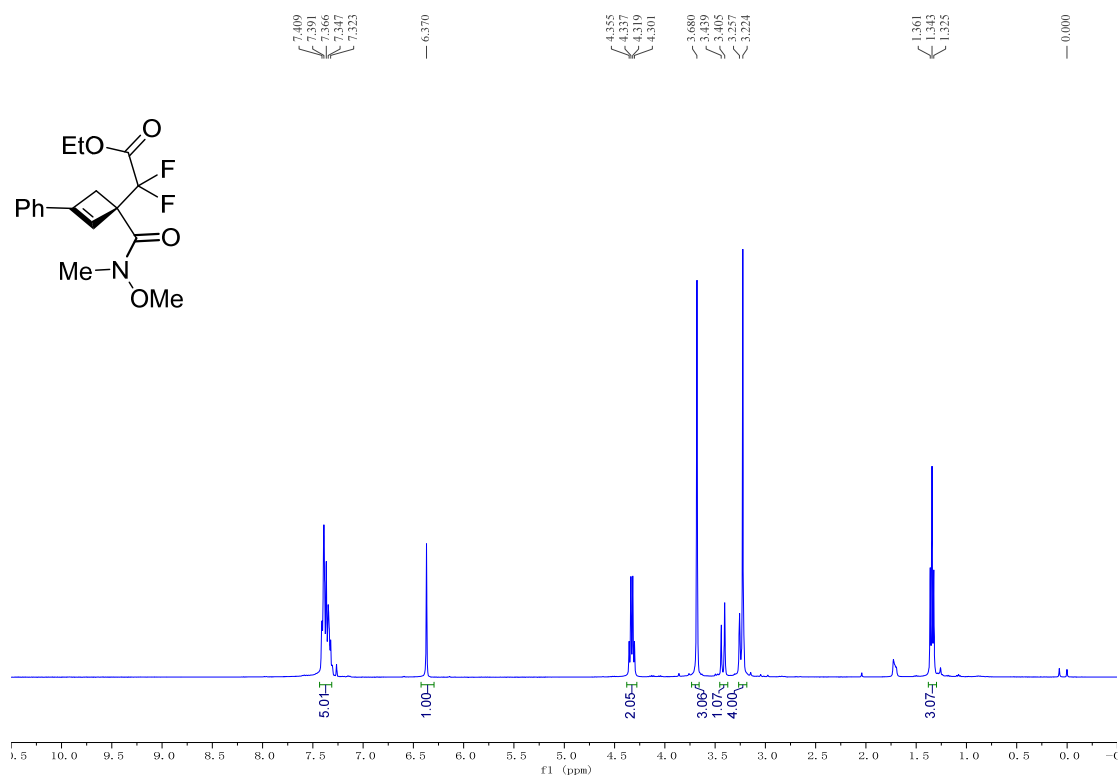 **$^{13}\text{C}$  NMR (100 MHz,  $\text{CDCl}_3$ )**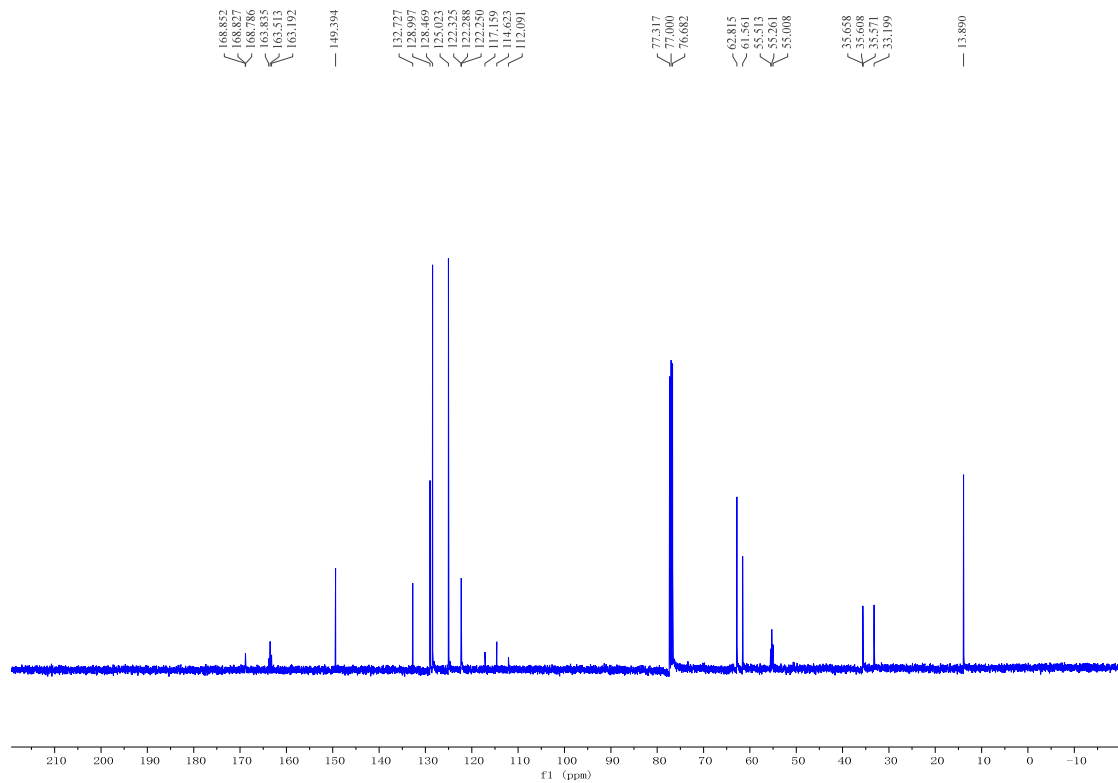

$^{19}\text{F}$  NMR (376 MHz,  $\text{CDCl}_3$ )

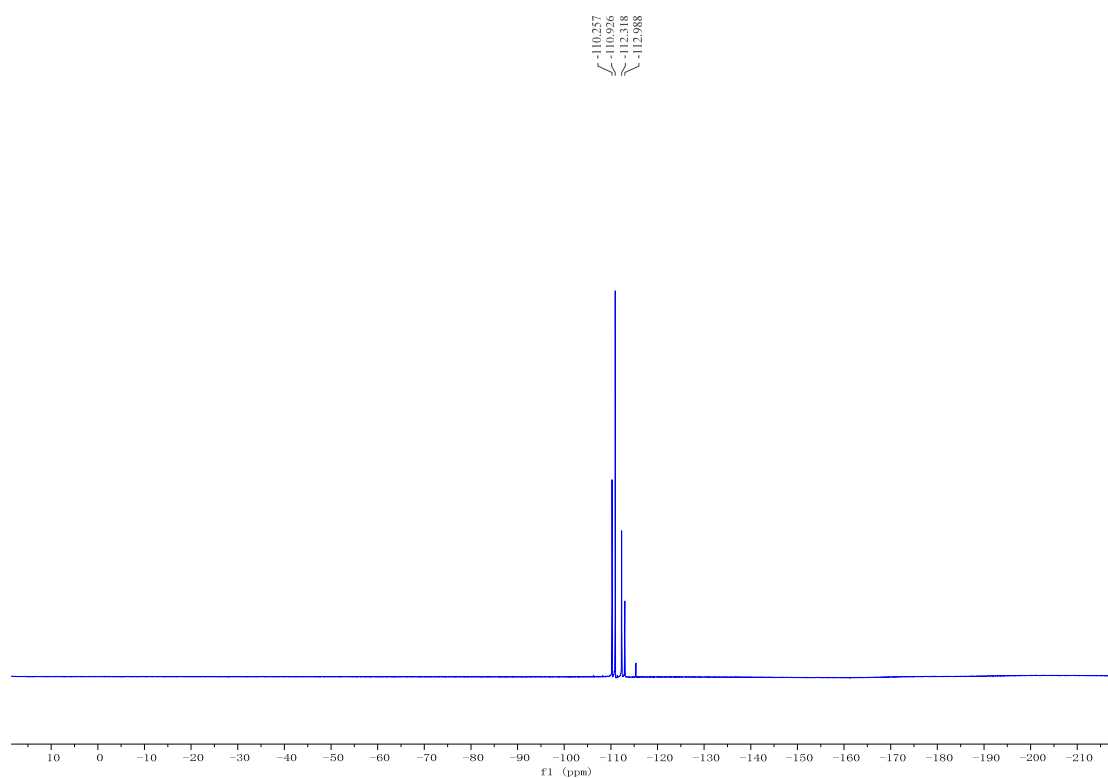

$^1\text{H}$  and  $^{13}\text{C}$  NMR Spectra for Compound 5aa:

$^1\text{H}$  NMR (400 MHz,  $\text{CDCl}_3$ )

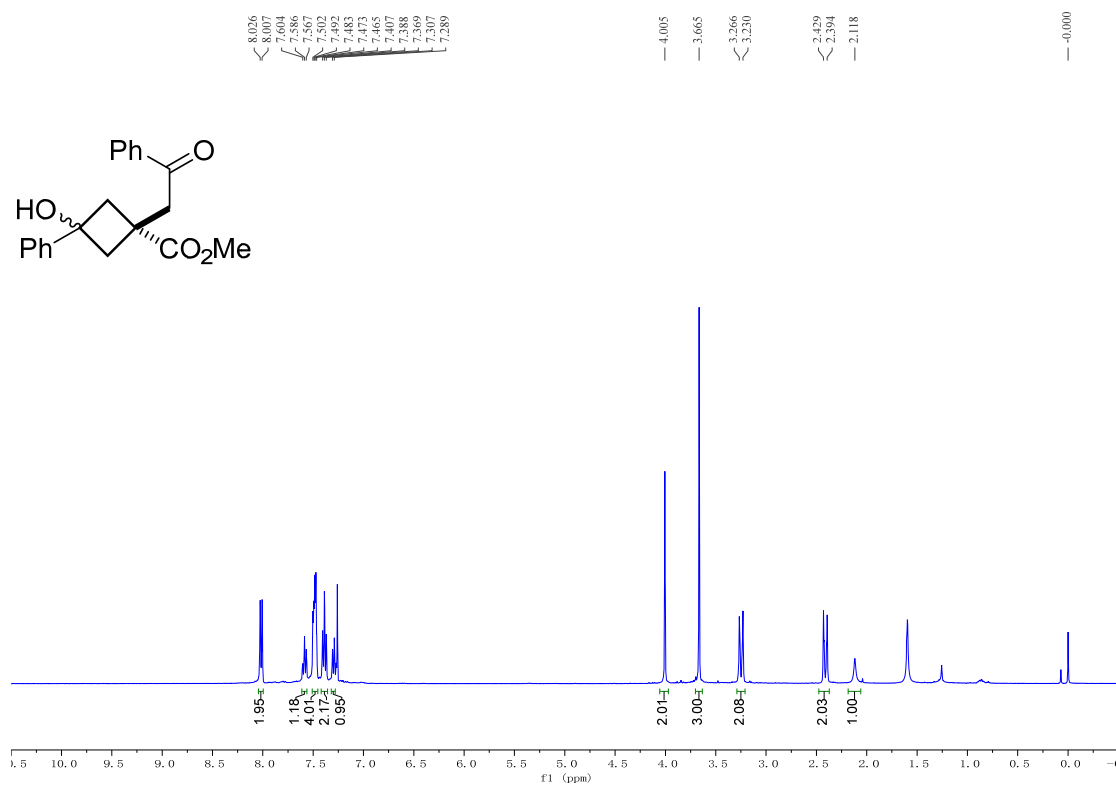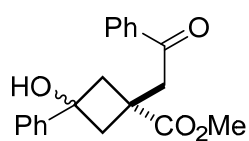

**$^{13}\text{C}$  NMR (400 MHz,  $\text{CDCl}_3$ )**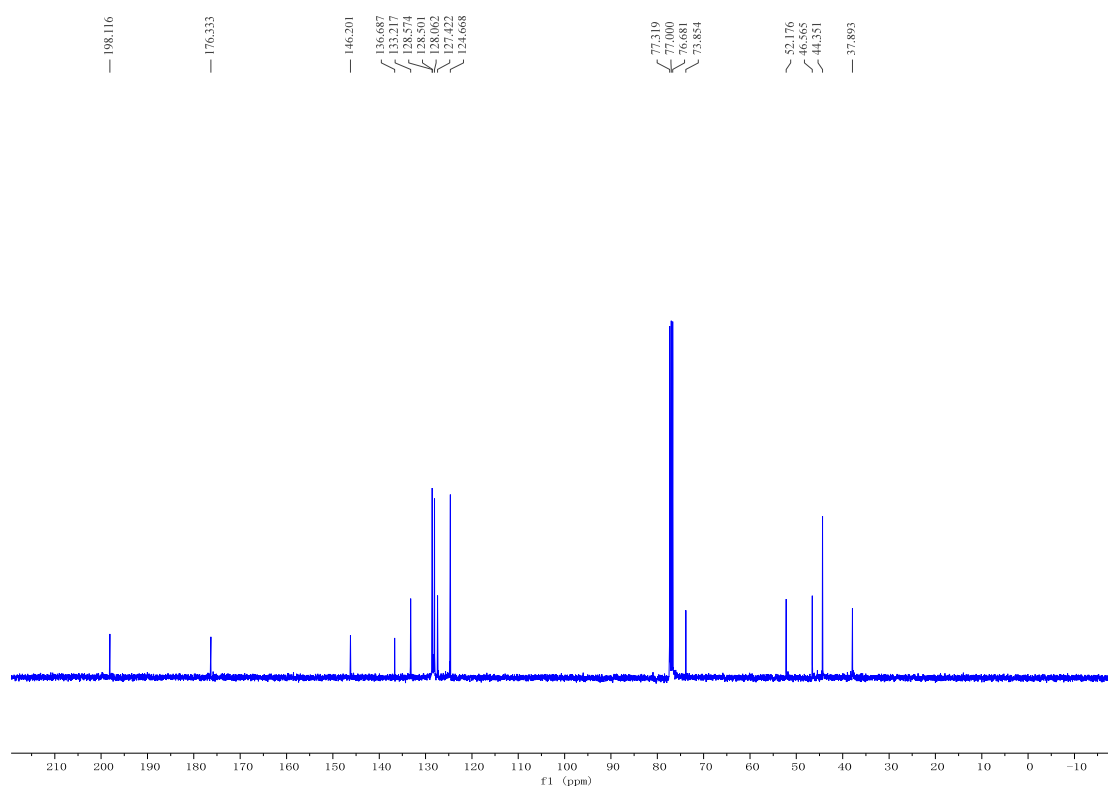 **$^1\text{H}$  and  $^{13}\text{C}$  NMR Spectra for Compound 6:** **$^1\text{H}$  NMR (400 MHz,  $\text{CDCl}_3$ ) for the major diastereomer**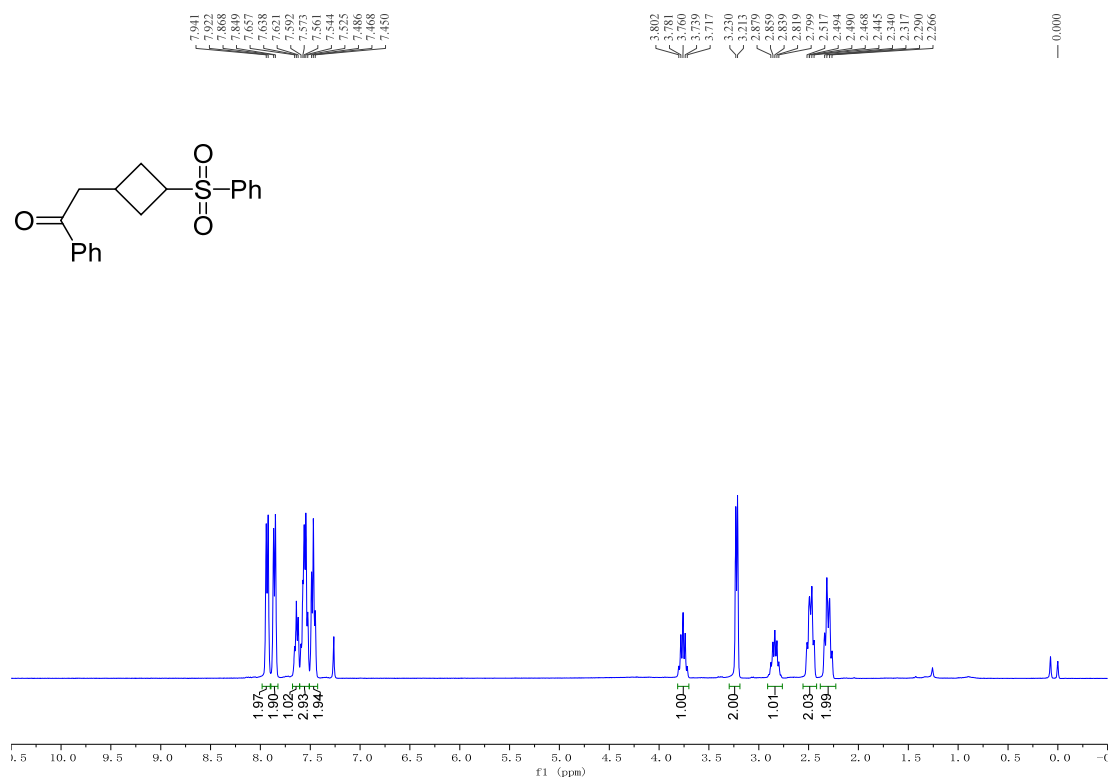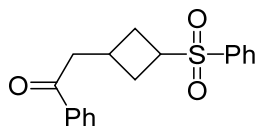



$^{13}\text{C}$  NMR (150 MHz,  $\text{CDCl}_3$ ) for the major diastereomer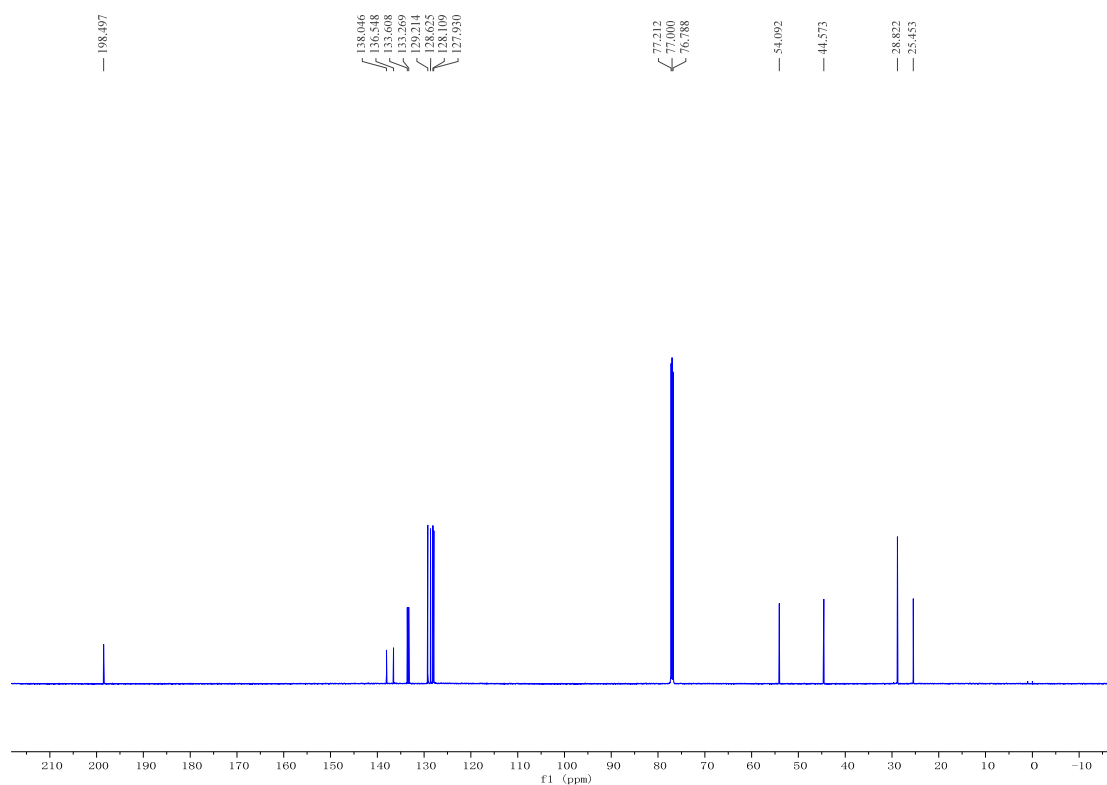 $^1\text{H}$  NMR (400 MHz,  $\text{CDCl}_3$ ) for the minor diastereomer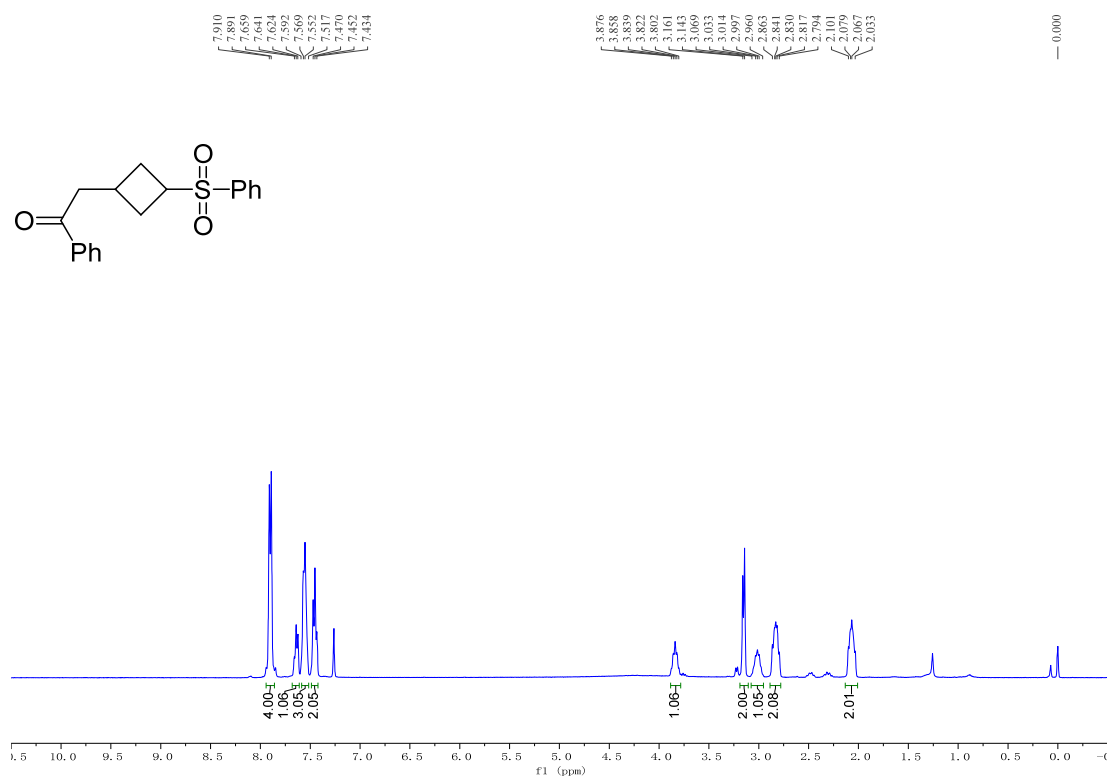

<sup>13</sup>C NMR (150 MHz, CDCl<sub>3</sub>) for the minor diastereomer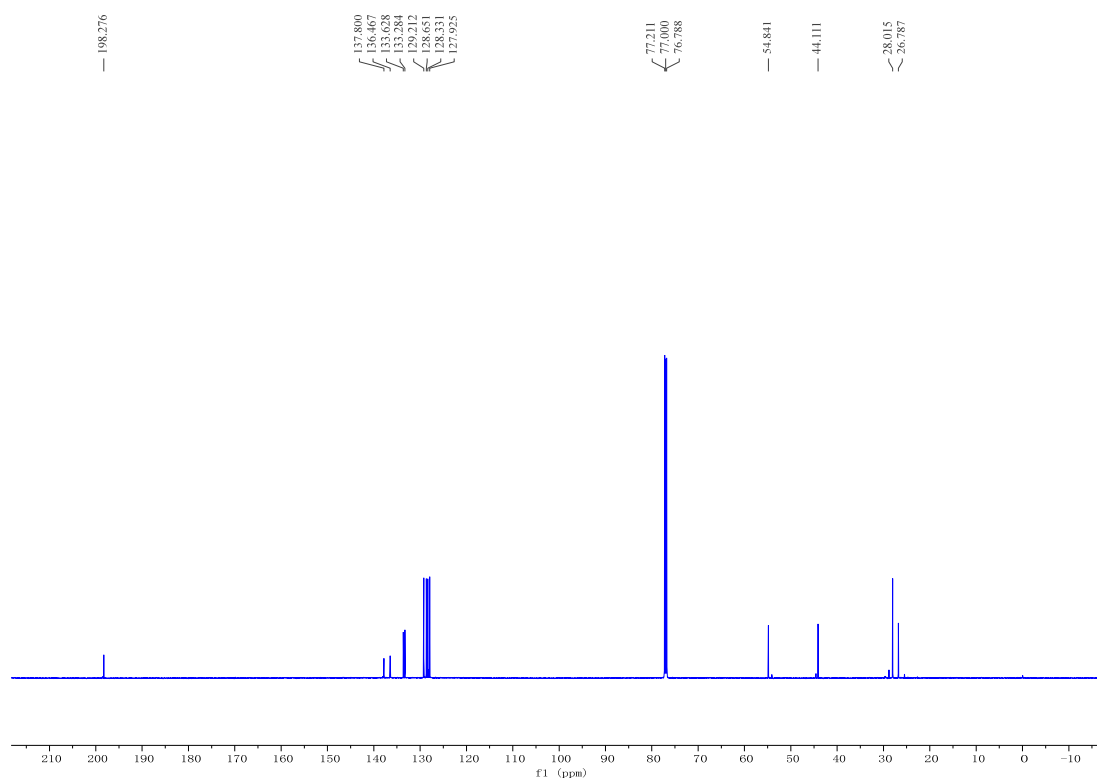<sup>1</sup>H and <sup>13</sup>C NMR Spectra for Compound 7:<sup>1</sup>H NMR (400 MHz, CDCl<sub>3</sub>)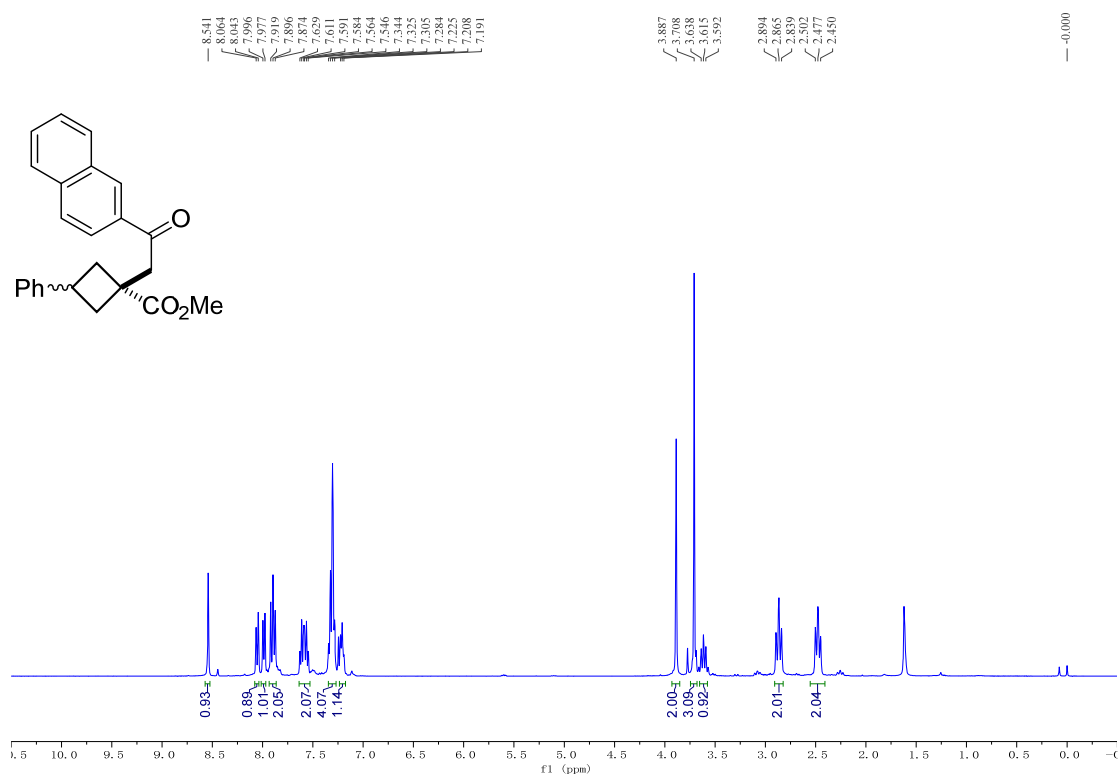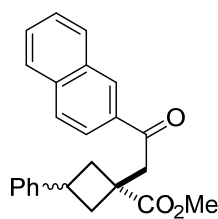

$^{13}\text{C}$  NMR (100 MHz,  $\text{CDCl}_3$ )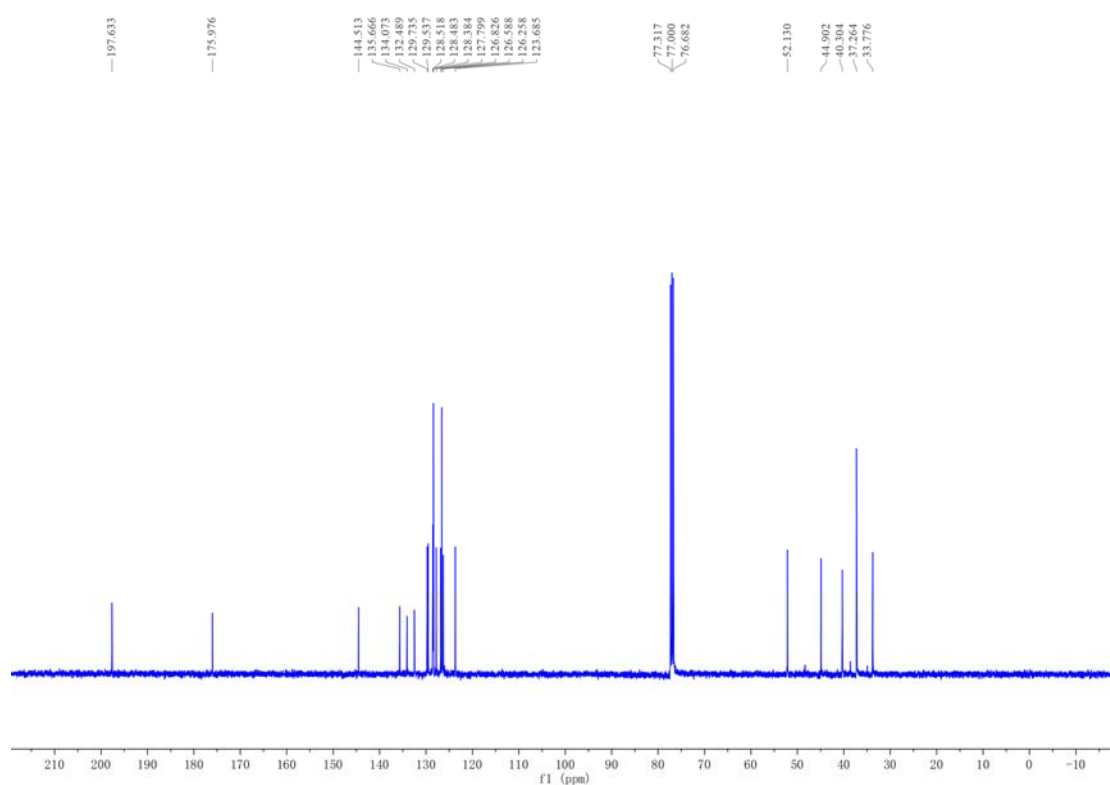 $^1\text{H}$  and  $^{13}\text{C}$  NMR Spectra for Compound 8 $^1\text{H}$  NMR (400 MHz,  $\text{CDCl}_3$ )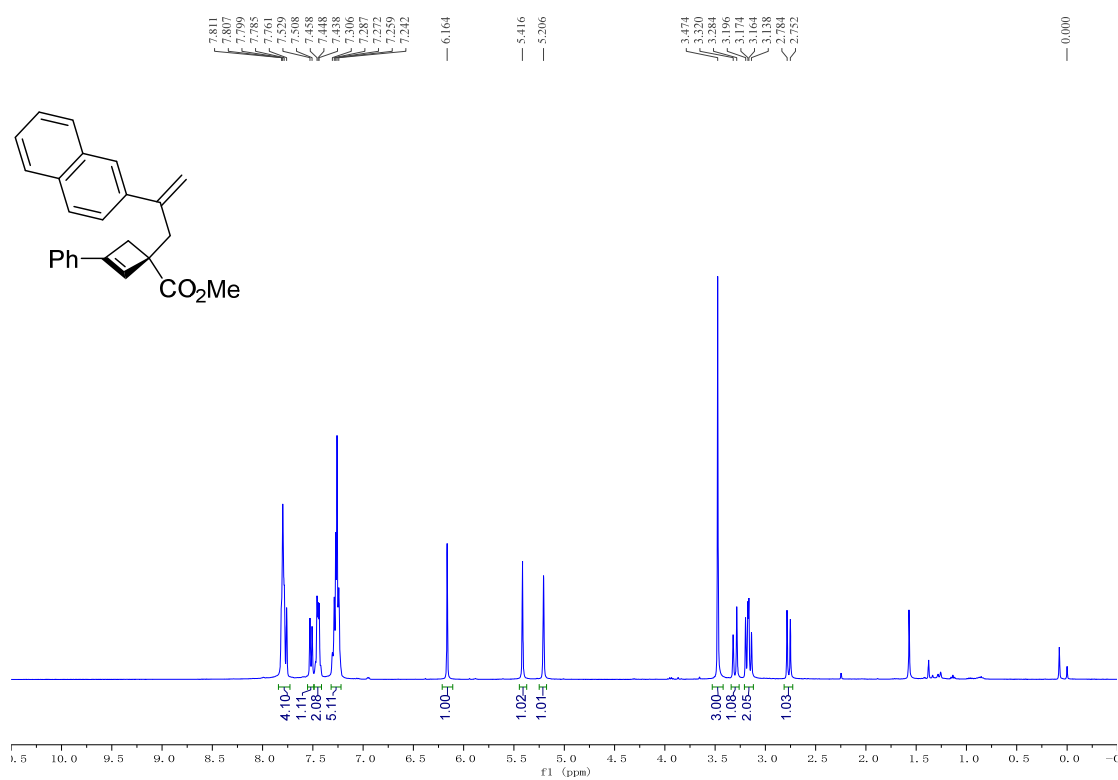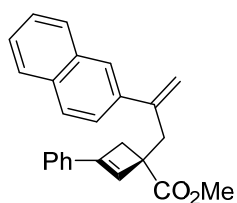

$^{13}\text{C}$  NMR (100 MHz,  $\text{CDCl}_3$ )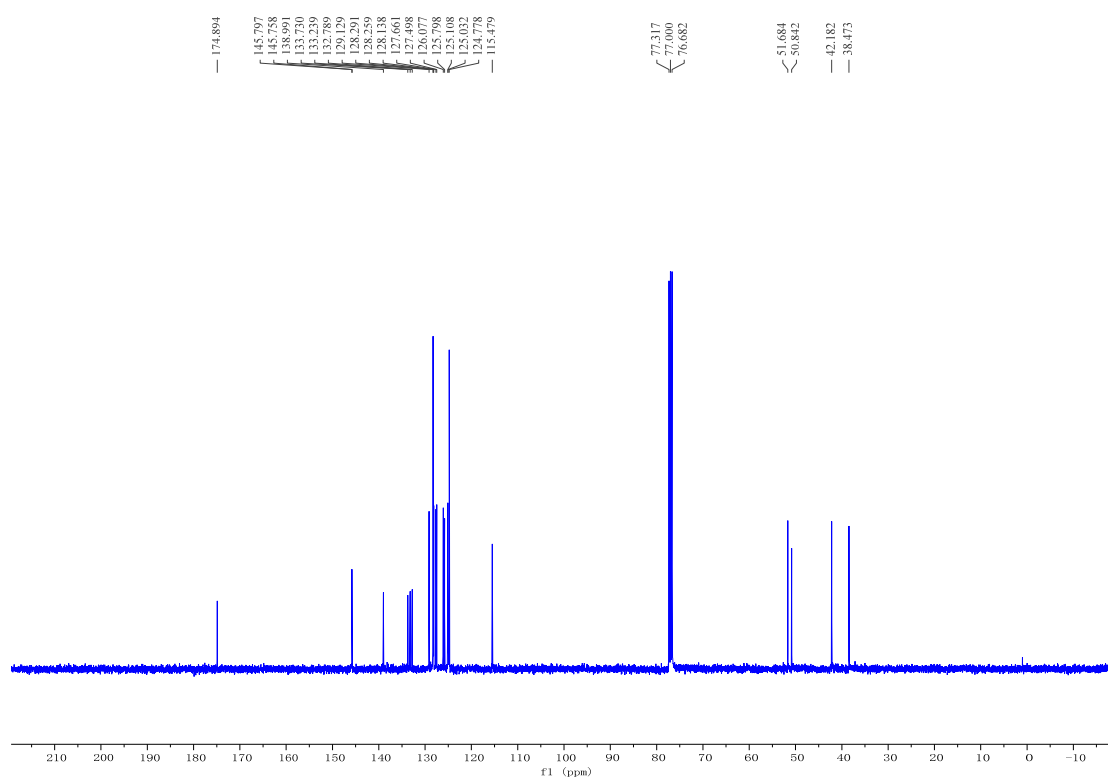 $^1\text{H}$  and  $^{13}\text{C}$  NMR Spectra for Compound 9: $^1\text{H}$  NMR (400 MHz,  $\text{CD}_3\text{COCD}_3$ )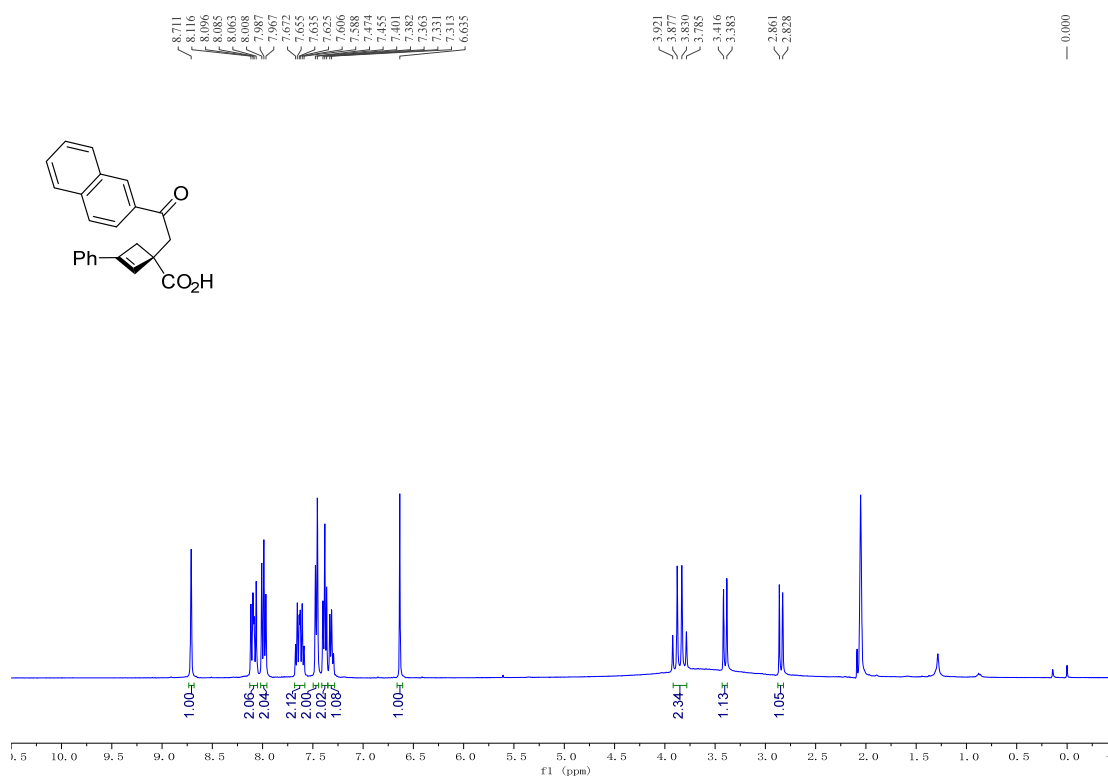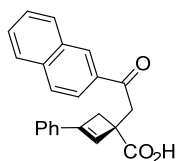

$^{13}\text{C}$  NMR (100 MHz,  $\text{CD}_3\text{COCD}_3$ )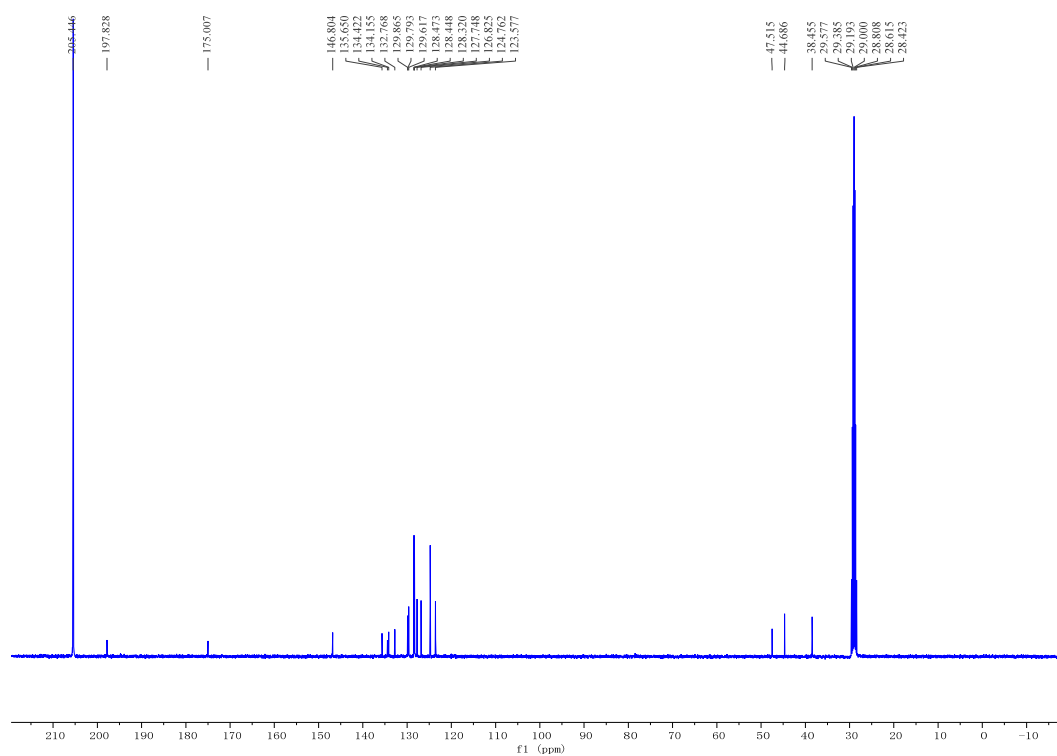 $^1\text{H}$  and  $^{13}\text{C}$  NMR Spectra for Compound 10: $^1\text{H}$  NMR (400 MHz,  $\text{CDCl}_3$ )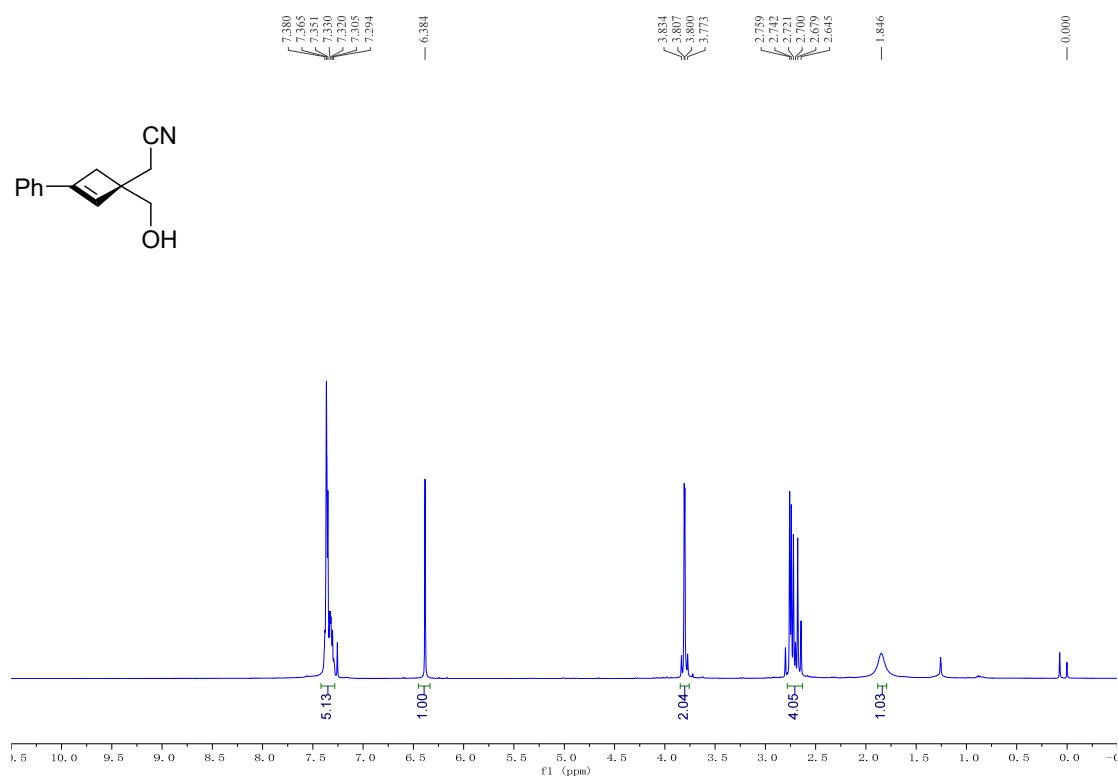

$^{13}\text{C}$  NMR (100 MHz,  $\text{CDCl}_3$ )

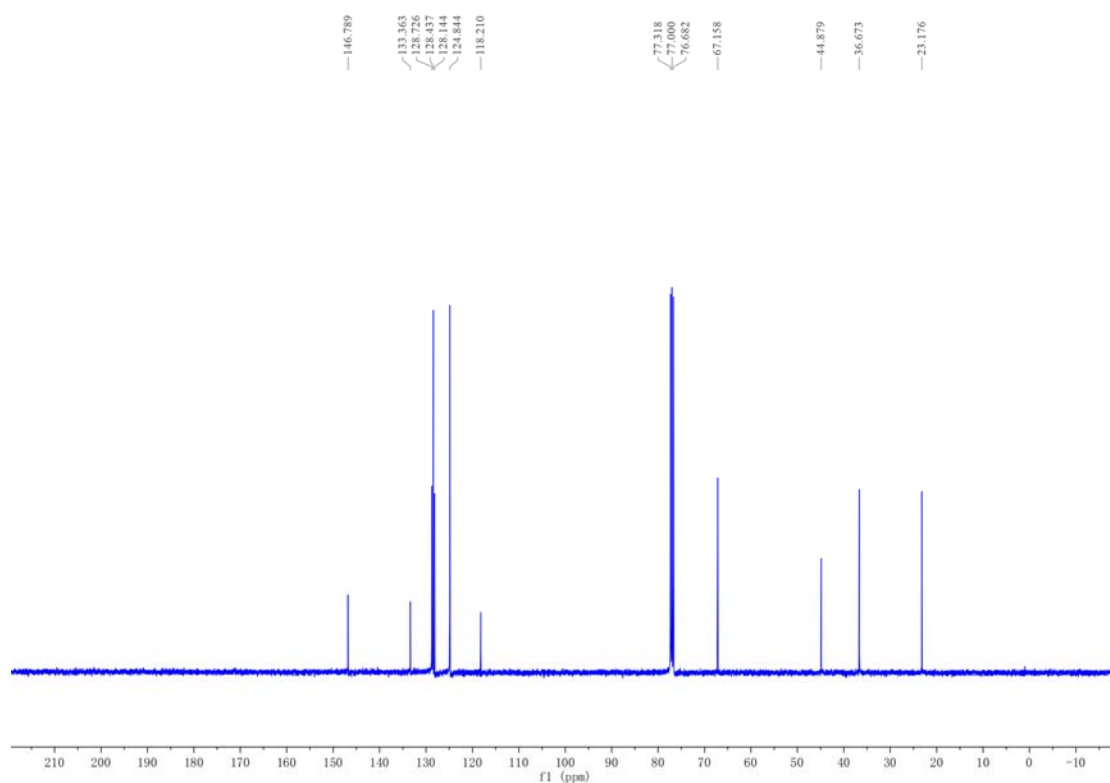

$^1\text{H}$  and  $^{13}\text{C}$  NMR Spectra for Compound 11:

$^1\text{H}$  NMR (400 MHz,  $\text{CD}_3\text{COCD}_3$ )

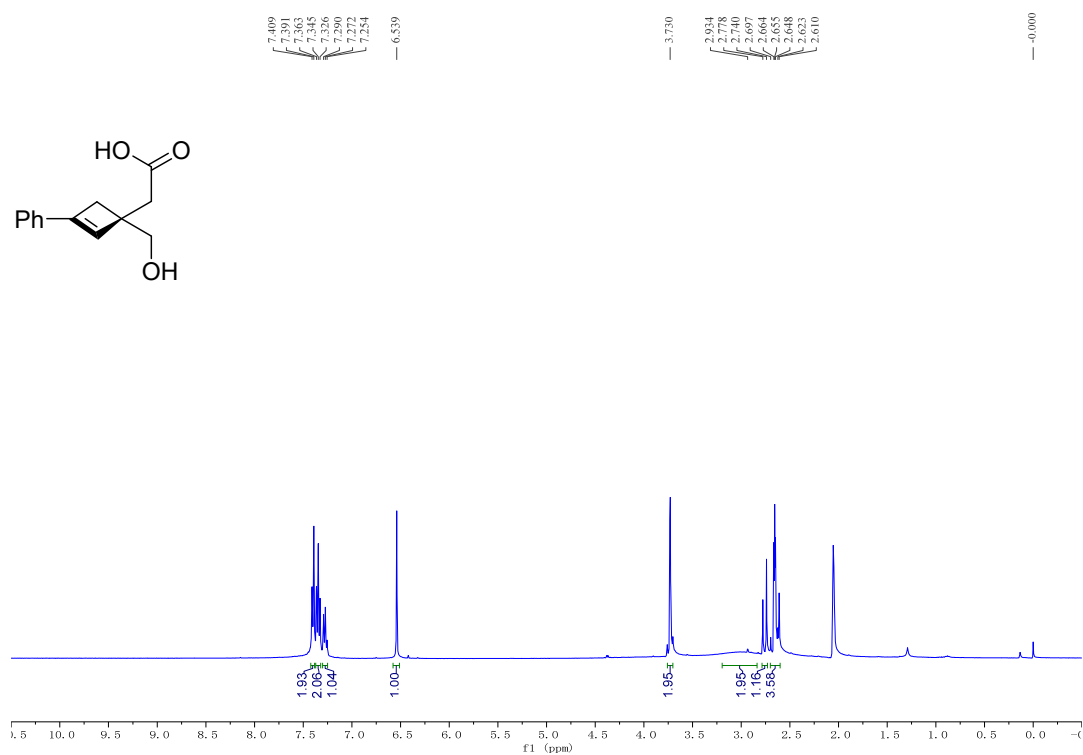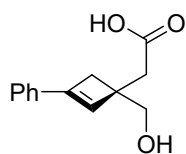

$^{13}\text{C}$  NMR (100 MHz,  $\text{CD}_3\text{COCD}_3$ )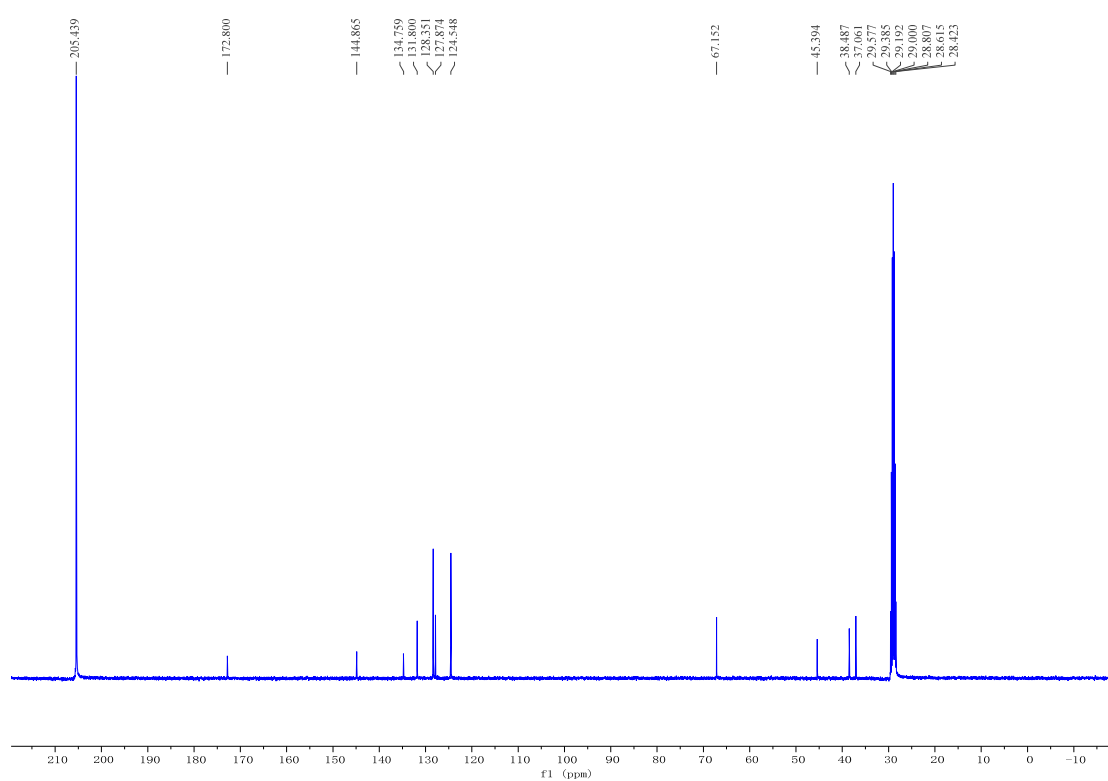 $^1\text{H}$ ,  $^{13}\text{C}$  NMR and  $^{19}\text{F}$  NMR Spectra for Compound 12: $^1\text{H}$  NMR (400 MHz,  $\text{CDCl}_3$ )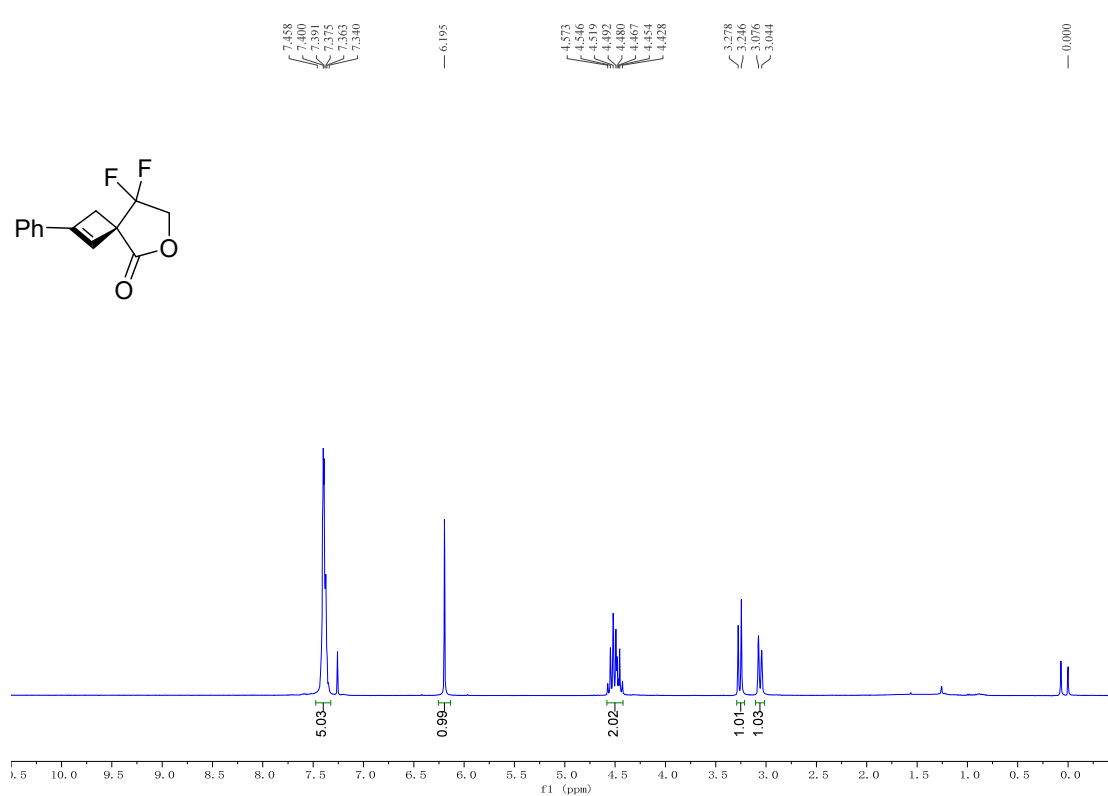

$^{13}\text{C}$  NMR (100 MHz,  $\text{CDCl}_3$ )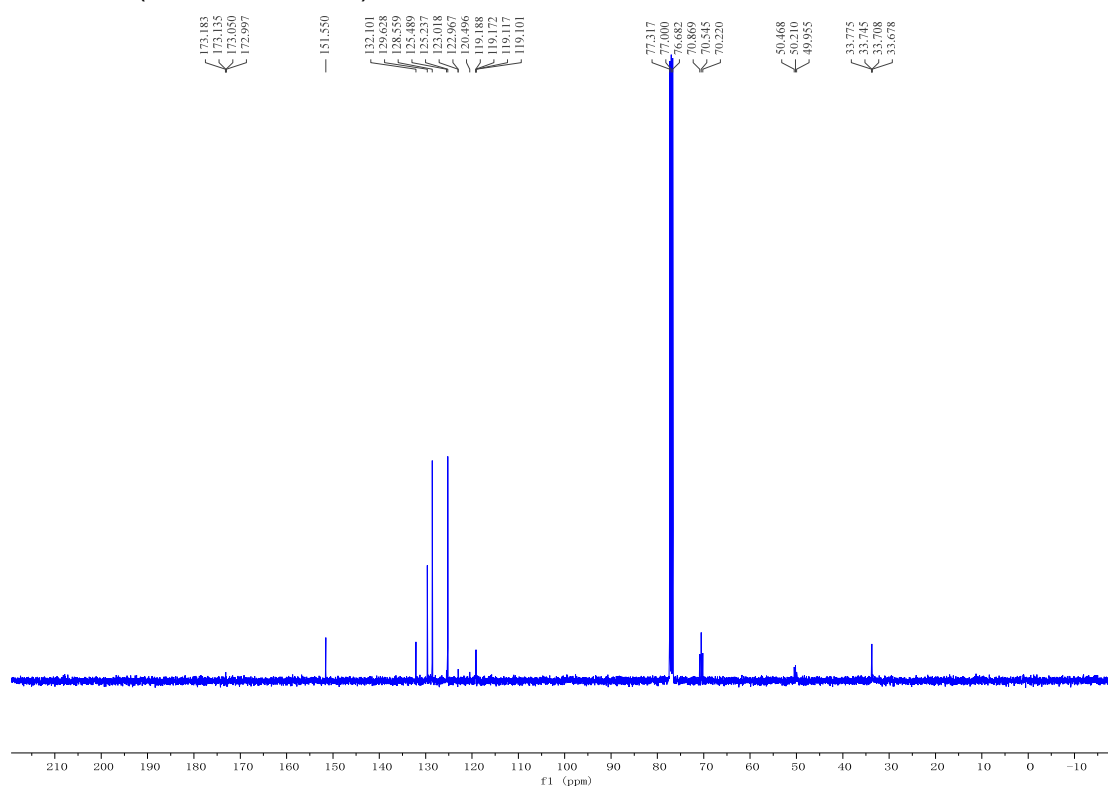 $^{19}\text{F}$  NMR (376 MHz,  $\text{CDCl}_3$ )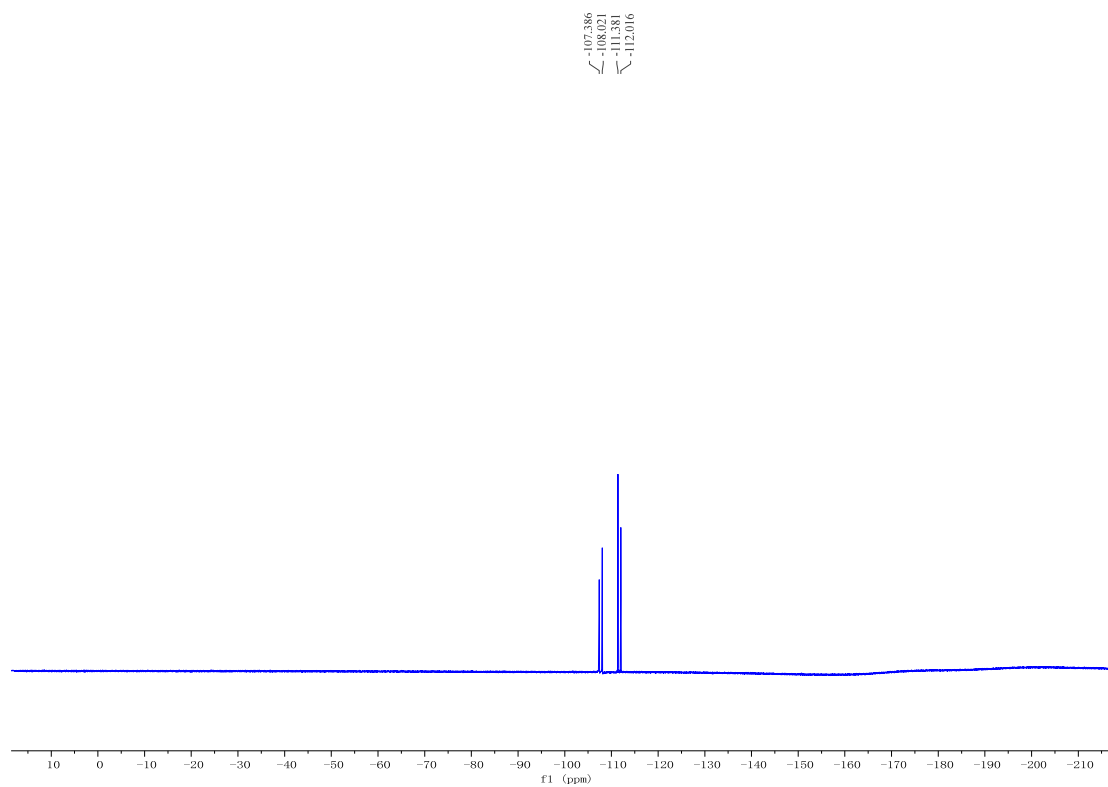



**$^1\text{H}$  and  $^{13}\text{C}$  NMR Spectra for Compound 13:** $^1\text{H}$  NMR (400 MHz,  $\text{CDCl}_3$ )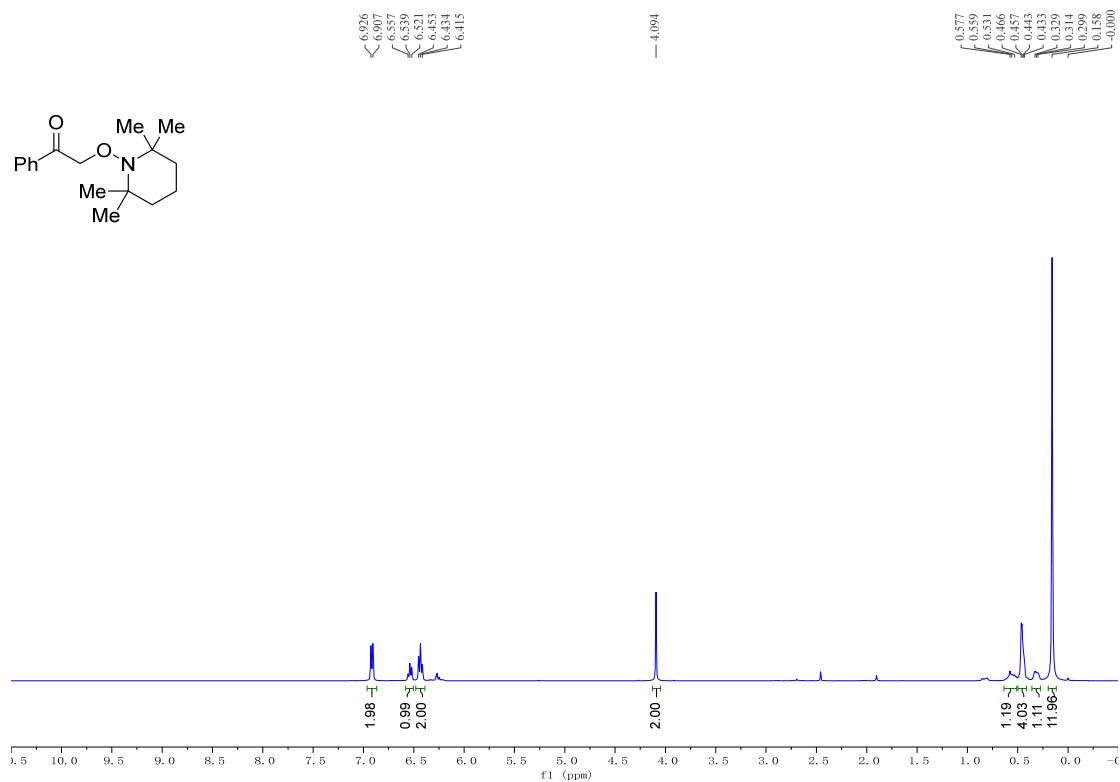 $^{13}\text{C}$  NMR (100 MHz,  $\text{CDCl}_3$ )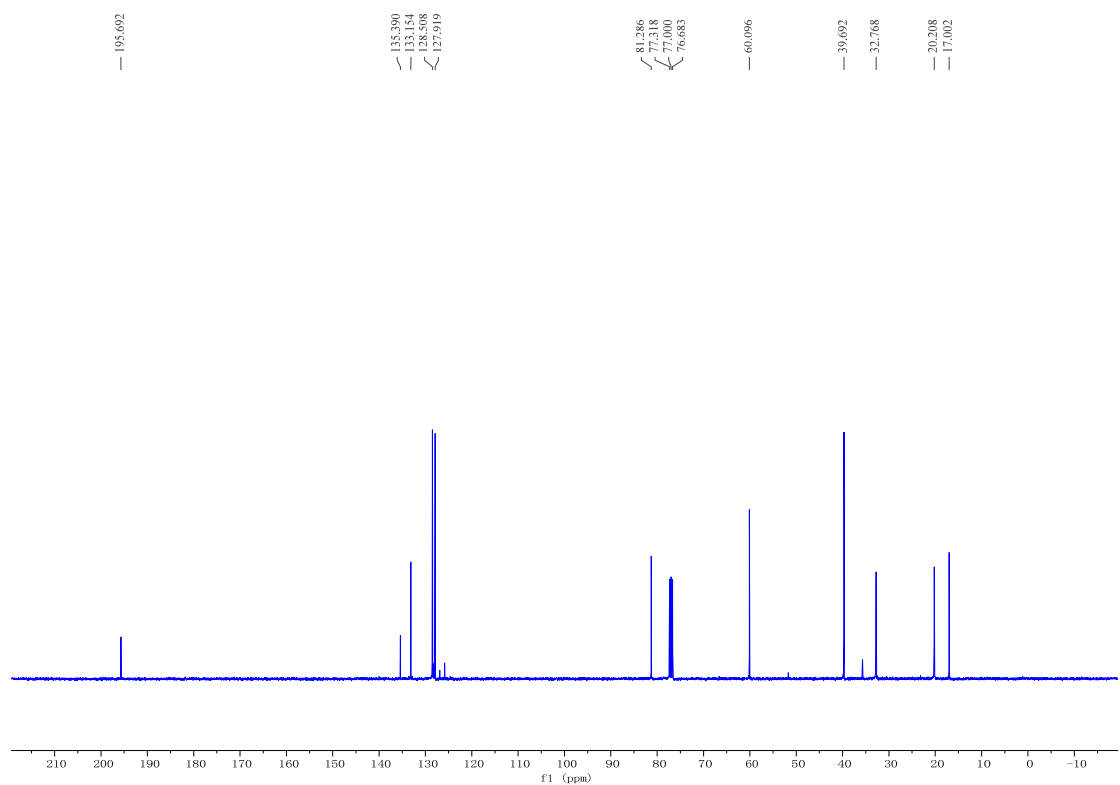

**$^1\text{H}$  and  $^{13}\text{C}$  NMR Spectra for Compound (Z)-14:** **$^1\text{H}$  NMR (400 MHz,  $\text{CDCl}_3$ )**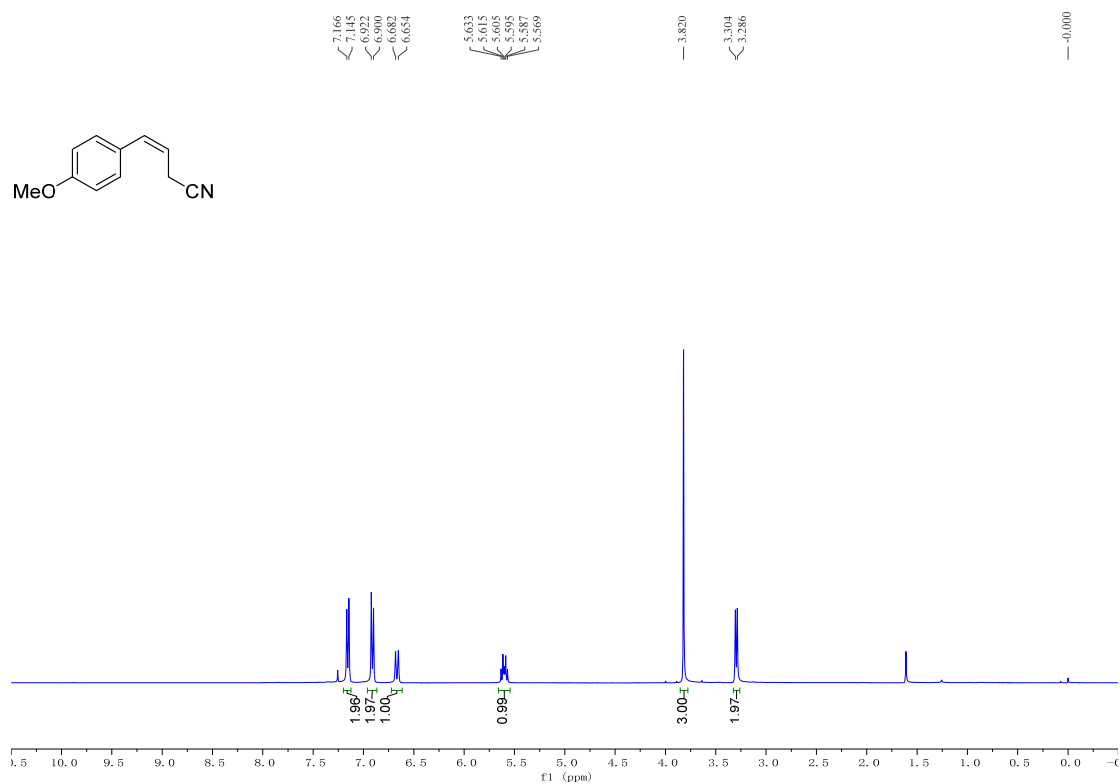 **$^{13}\text{C}$  NMR (100 MHz,  $\text{CDCl}_3$ )**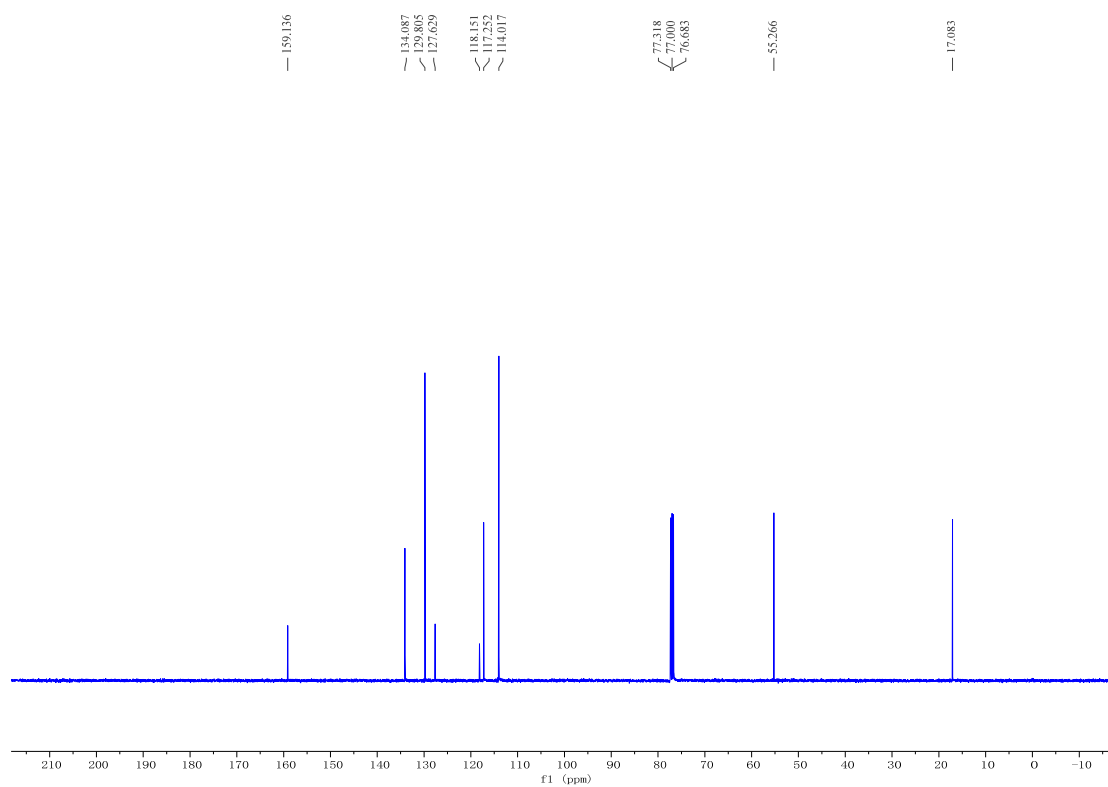

**$^1\text{H}$  and  $^{13}\text{C}$  NMR Spectra for Compound (E)-14:** **$^1\text{H}$  NMR (400 MHz,  $\text{CDCl}_3$ )**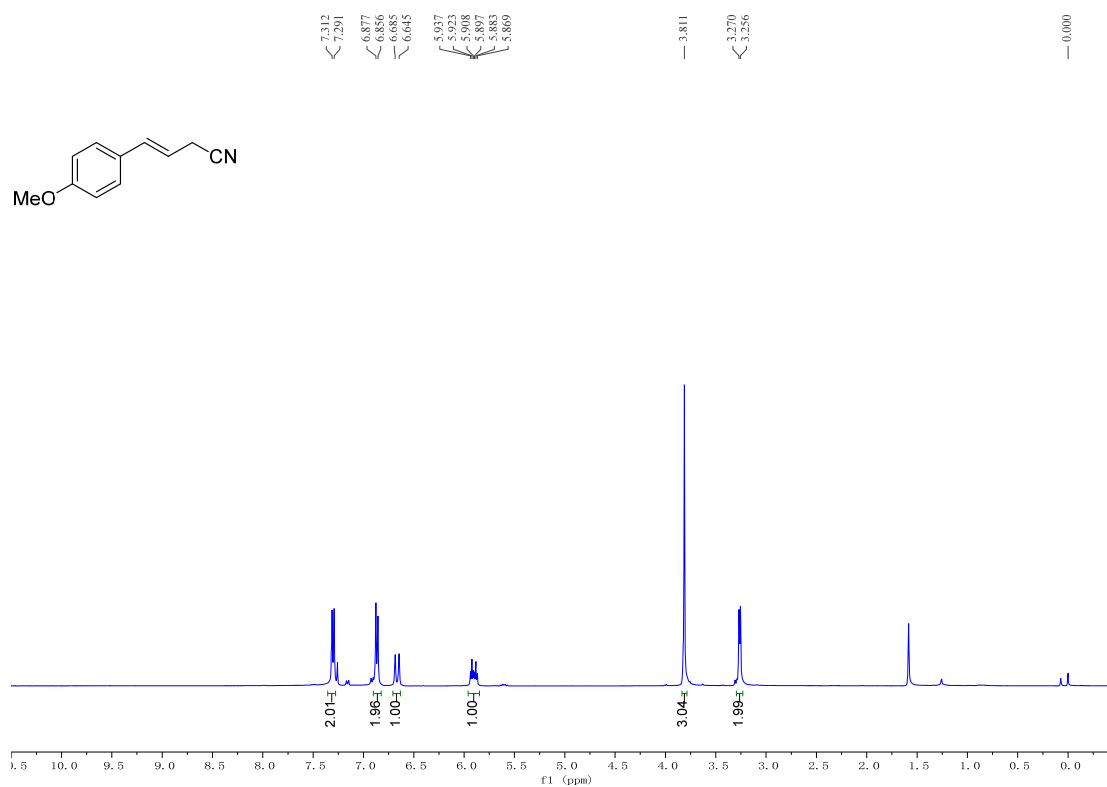 **$^{13}\text{C}$  NMR (100 MHz,  $\text{CDCl}_3$ )**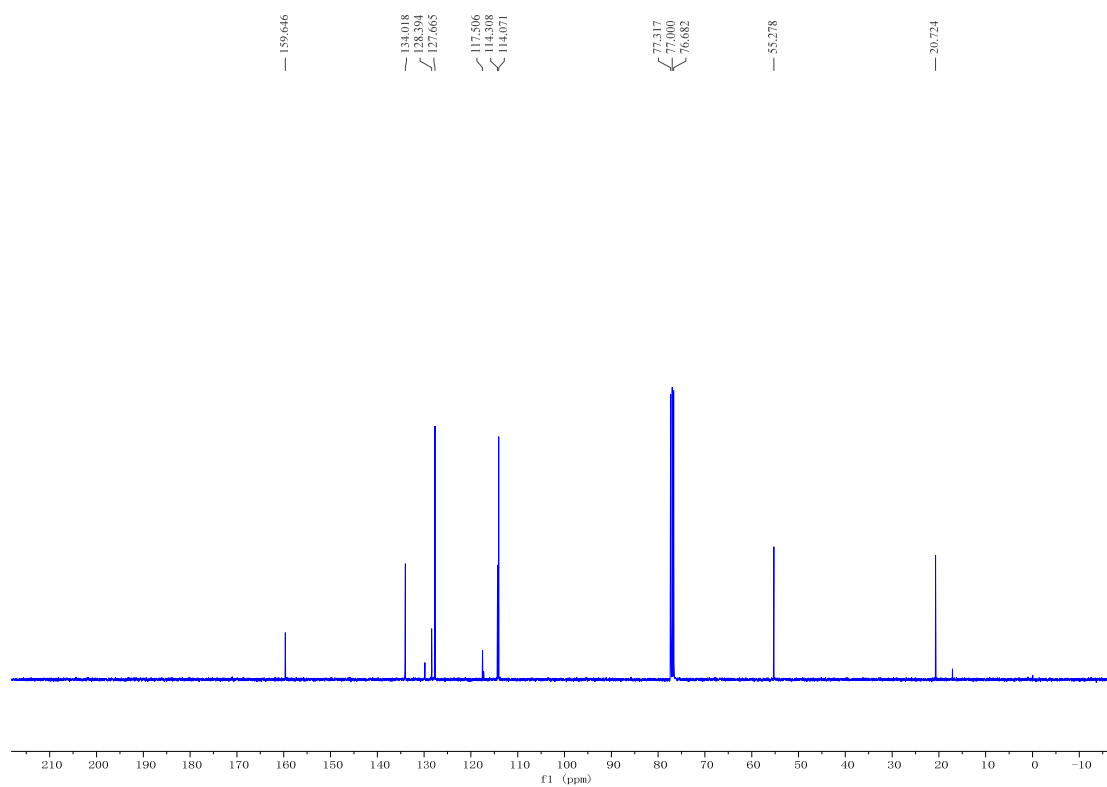

**$^1\text{H}$  and  $^{13}\text{C}$  NMR Spectra for Compound 3pa:**

$^1\text{H}$  NMR (600 MHz,  $\text{CDCl}_3$ ): the desired **3pa** containing unknown by-products that cannot be separated using flash chromatography on silica gel.

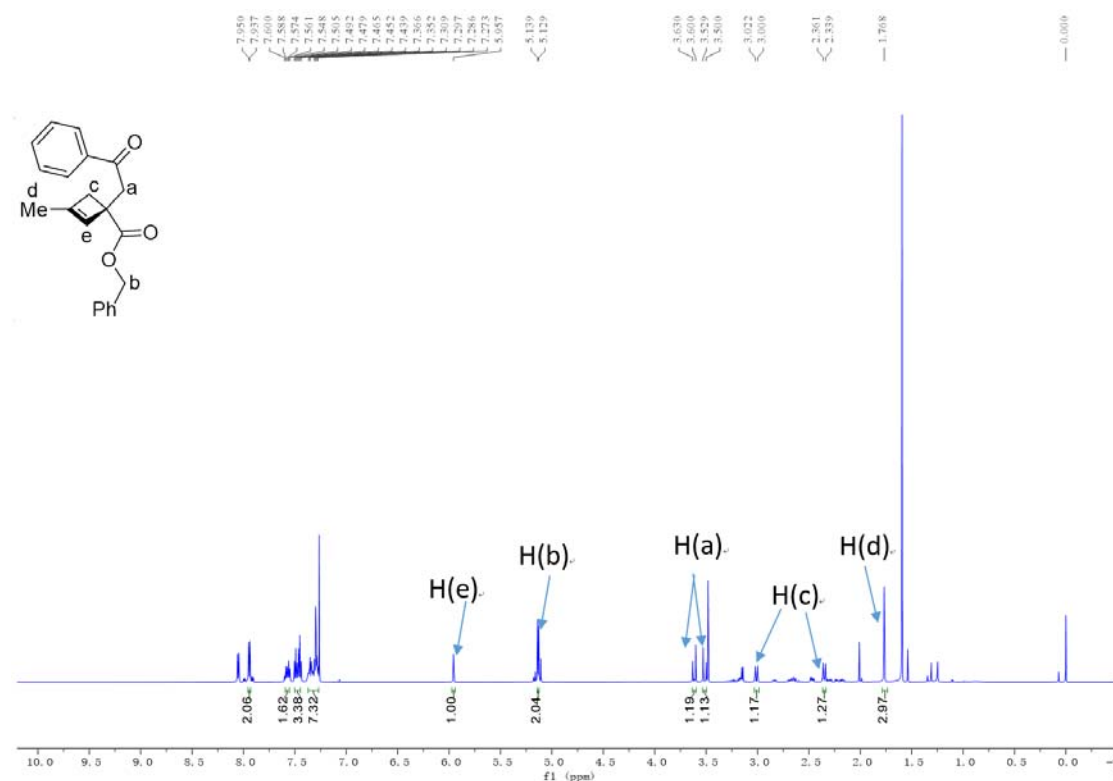 **$^{13}\text{C}$  NMR (150 MHz,  $\text{CDCl}_3$ )**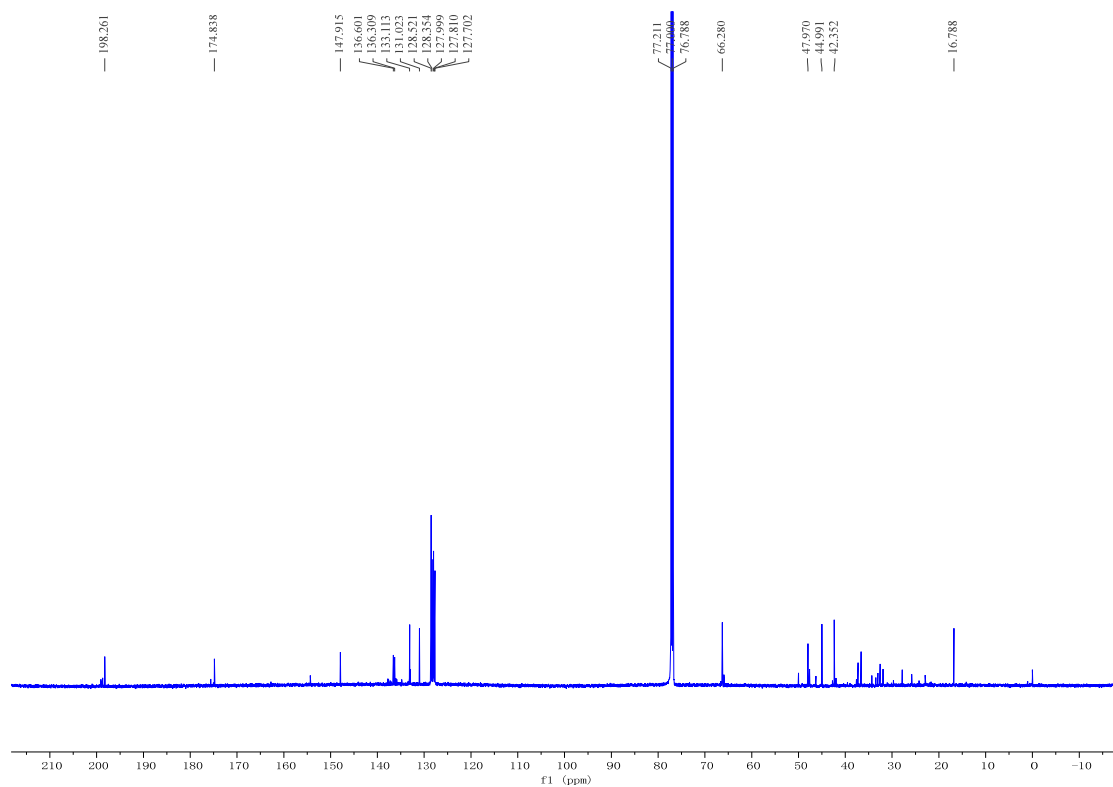

**$^1\text{H}$  and  $^{13}\text{C}$  NMR Spectra for Compound 16:**

$^1\text{H}$  NMR (400 MHz,  $\text{CDCl}_3$ ) for the major diastereomer (containing unknown by-products that cannot be separated using flash chromatography on silica gel.)

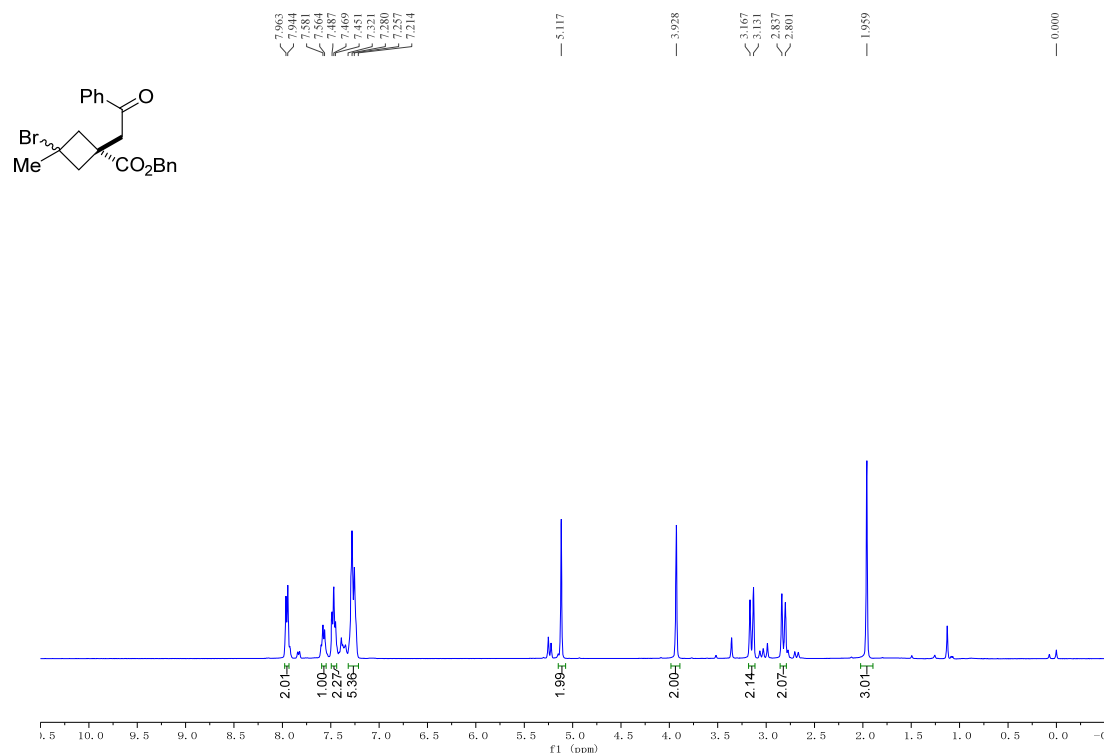

$^{13}\text{C}$  NMR (150 MHz,  $\text{CDCl}_3$ ) for the major diastereomer

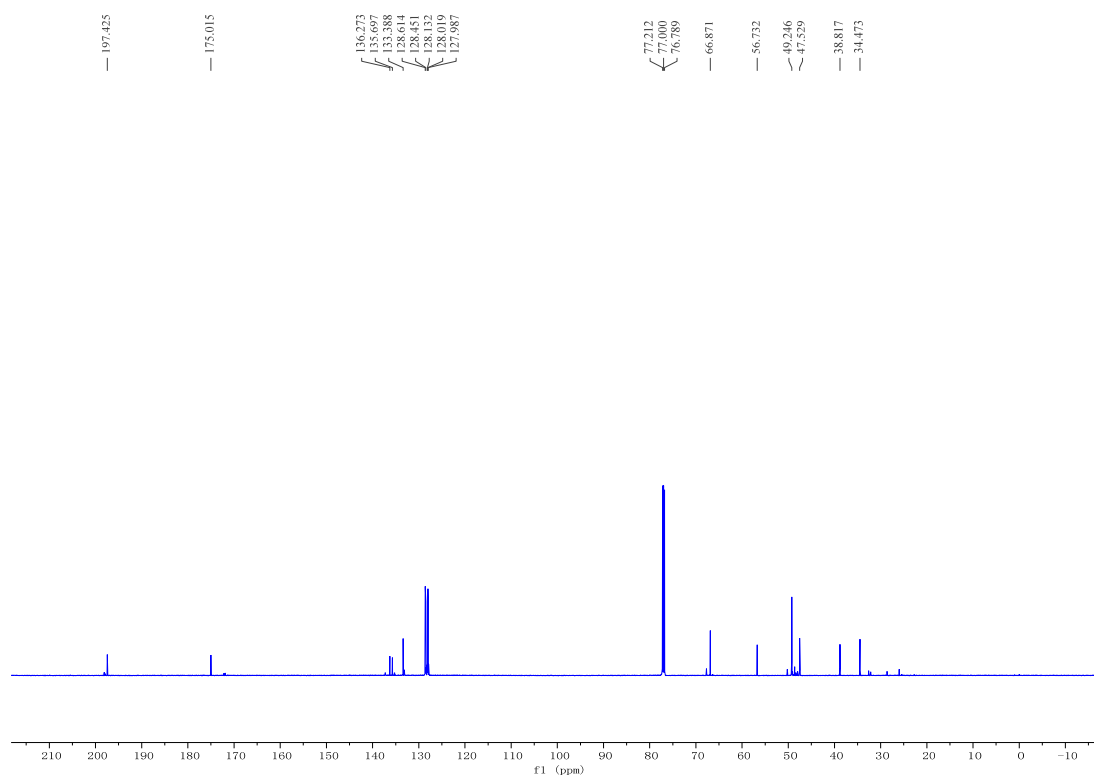

<sup>1</sup>H NMR (400 MHz, CDCl<sub>3</sub>) for the minor diastereomer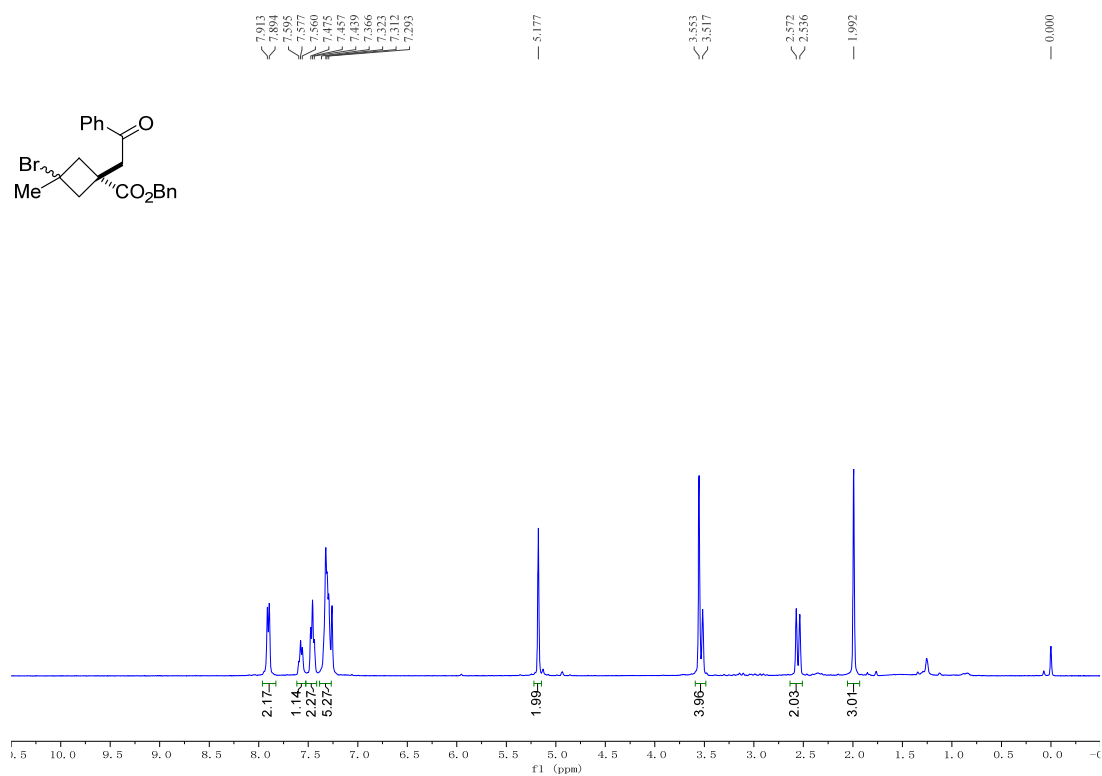<sup>13</sup>C NMR (150 MHz, CDCl<sub>3</sub>) for the minor diastereomer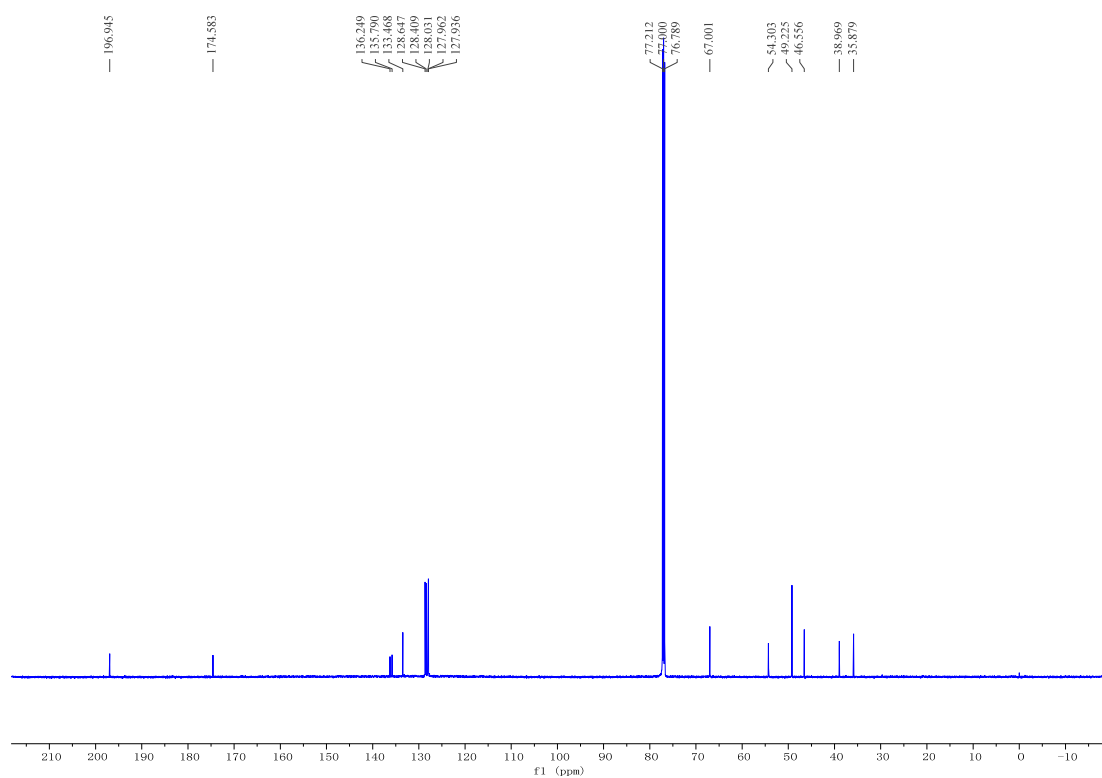

Supplement: d3sc04457b1.pdf [file d3sc04457b1.pdf]
